# 1 Evolutionary Origin of Vertebrate OCT4/POU5 Functions 2 in Supporting Pluripotency

3

4 Woranop Sukparangsi<sup>1,2†</sup>, Elena Morganti<sup>1†</sup>, Molly Lowndes<sup>1</sup>, H el ene Mayeur<sup>3</sup>, Melanie  
5 Weisser<sup>4</sup>, Fella Hammachi<sup>5</sup>, Hanna Peradziryi<sup>1</sup>, Fabian Roske<sup>1</sup>, Jurriaan H olzespies<sup>1</sup>,  
6 Alessandra Livigni<sup>5</sup>, Benoit Gilbert Godard<sup>6</sup>, Fumiaki Sugahara<sup>7</sup>, Shigeru Kuratani<sup>8</sup>,  
7 Guillermo Montoya<sup>4</sup>, Stephen R. Frankenberg<sup>9</sup>, Sylvie Mazan<sup>3\*</sup>, Joshua M Brickman<sup>1\*</sup>

8

## 9 Affiliations

10 1. Novo Nordisk Foundation Center for Stem Cell Medicine (reNEW), University of Copenhagen, 3B  
11 Blegdamsvej, 2200 Copenhagen, Denmark

12 2. Department of Biology, Faculty of Science, Burapha University, Chon Buri, Thailand

13 3. CNRS, Sorbonne Universit e, Biologie Int egrative des Organismes Marins, UMR7232, F-66650  
14 Banyuls sur Mer, France.

15 4. Novo Nordisk Foundation Center for Protein Research, University of Copenhagen, 3B  
16 Blegdamsvej, 2200 Copenhagen, Denmark

17 5. MRC Centre for Regenerative Medicine, Institute for Stem Cell Research, School of Biological  
18 Sciences, 5 Little France Drive, University of Edinburgh, Edinburgh, EH16 4UU, UK

19 6. CNRS, Sorbonne Universit e, UPMC Univ Paris 06, FR2424, Development and Evolution of  
20 Vertebrates Group, Station Biologique, F-29688 Roscoff, France; Present address: CNRS, Sorbonne  
21 Universit e, Laboratoire de Biologie du D eveloppement de Villefranche, UMR7009, F-06234  
22 Villefranche sur Mer, France.

23 7. Division of Biology, Hyogo College of Medicine, Nishinomiya, Hyogo, Japan

24 8. Laboratory for Evolutionary Morphology, RIKEN Center for Biosystems Dynamics Research  
25 (BDR), Kobe, Japan

26 9. Department of Zoology, University of Melbourne, Melbourne, VIC 3010, Australia

27

28 \*Corresponding authors : Joshua M Brickman ([joshua.brickman@sund.ku.dk](mailto:joshua.brickman@sund.ku.dk)) and Sylvie  
29 Mazan ([mazan@obs-banyuls.fr](mailto:mazan@obs-banyuls.fr))

30 †These authors contributed equally to this work.

31

32 **Key words** : OCT4, POU5, POU5F1, POU5F3, pluripotency, self-renewal, cyclostome,  
33 gnathostome, vertebrate, embryonic stem cells

34

35 **Short Title** : Origin of OCT4/POU5 Supported Pluripotency

## 36 **Abstract**

37 The support of pluripotent cells over time is an essential feature of development. In eutherian  
38 embryos, pluripotency is maintained from naïve states in peri-implantation to primed  
39 pluripotency at gastrulation. To understand how these states emerged, we reconstruct the  
40 evolutionary trajectory of the *Pou5* gene family, which contains the central pluripotency factor  
41 OCT4. By coupling evolutionary sequence analysis with functional studies in mouse  
42 Embryonic Stem Cells (ESCs), we found that the ability of POU5 proteins to support  
43 pluripotency originated in the gnathostome lineage, prior to the generation of two paralogues,  
44 *Pou5f1* and *Pou5f3* via gene duplication. In osteichthyans, retaining both genes, the paralogues  
45 differ in their support of naïve and primed pluripotency. This specialization of these duplicates  
46 enables the diversification of function in self-renewal and differentiation. By integrating  
47 sequence evolution, ESC phenotypes, developmental contexts and structural modelling, we  
48 pinpoint OCT4 regions sufficient for naïve pluripotency and describe their adaptation over  
49 evolutionary time.

## 50 Introduction

51 Pluripotency refers to the capacity of a cell to give rise to all lineages of the adult body,  
52 including the germ line. This functional property was historically defined based on the advent  
53 of mouse Embryonic Stem Cells (ESCs), which made the mouse the reference model to define  
54 and explore the molecular basis for pluripotency. As the number of culture models expanded,  
55 it became clear that pluripotent cells exist across a range of cell states and developmental  
56 windows. In mammals, pluripotent cells can be found throughout distinct developmental stages  
57 *in vivo*, transitioning from an initial naïve state to a lineage primed one as development  
58 progresses from pre-implantation stages to gastrulation (reviewed in ref<sup>1</sup>). In mouse, these two  
59 states can be captured and cells can be expanded *ex vivo* in well-defined culture conditions.  
60 Mouse ESCs represent a naïve pluripotent state and their gene expression pattern approximates  
61 that of the Inner Cell Mass (ICM) of pre-implantation embryos. Mouse Epiblast Stem Cells  
62 (EpiSCs) represent a primed pluripotent state, which is more reminiscent of later pre-  
63 gastrulation stages of development<sup>2,3</sup>. The regulation of these pluripotent states has been  
64 extensively investigated and involves the input of extrinsic signals into a complex network of  
65 transcription factors. While naïve and primed cells share expression of a number of transcription  
66 factors, including OCT4 (POU5F1), SOX2 and NANOG, the transition from a naïve to primed  
67 state involves major changes in embryonic environment, transcriptomic profile (with the down-  
68 regulation and up-regulation of state or stage specific pluripotency regulators such as *Esrrb*,  
69 *Prdm15* or *FoxD3*) and enhancer or chromatin landscapes<sup>4-12</sup>. These molecular changes parallel  
70 a remodelling of embryo architecture, including epithelialisation and generation of the amniotic  
71 cavity<sup>13,14</sup>.

72 While the functional definition of pluripotency is unique to mammals, the concept of  
73 pluripotent populations is central to all developmental biology. Even with a plethora of  
74 mechanistic information characterising pluripotent states in the mouse, there is a scarcity of  
75 data on their evolutionary origin and conservation across vertebrates. ESCs exhibiting either  
76 naïve or primed pluripotency have been obtained in humans and other primates<sup>15-20</sup>, but a clear  
77 set of distinct cell types has yet to be defined in marsupials and monotremes<sup>21,22</sup>. Similarly, the  
78 existence of a naïve pluripotent state in the zebrafish embryo, based on early expression  
79 dynamics of a selection of pluripotency markers, remains hypothetical in the absence of  
80 established cell lines exhibiting ESC properties<sup>23</sup>. Altogether, the existence of naïve and primed  
81 pluripotent states, as extensively described in the mouse, remains unclear outside eutherians.  
82 An alternative approach to investigate their origin is to deconstruct their evolutionary trajectory,

83 analysing when the capacity of key members of the pluripotency network to support these states  
84 emerged during evolution. We have used this approach, focusing on class V POU domain  
85 (POU5) transcription factors (OCT4 in the mouse) at key nodes of the vertebrate tree. This  
86 small multigene family comprises two orthology classes, *Pou5f1* and *Pou5f3*, in jawed  
87 vertebrates (gnathostomes)<sup>24,25</sup>. While a number of key nodes in gnathostome evolution retain  
88 both genes, why a single paralogue is retained in many vertebrate species remains a mystery.  
89 In eutherians, *Oct4*, which belongs to the *Pou5f1* class, is the only representative of the gene  
90 family and is a central regulator of pluripotency both *in vivo* and *in vitro*. It is absolutely  
91 required to establish and maintain pluripotency in all contexts, but depending on expression  
92 levels, it can also mediate differentiation into distinct embryonic lineages<sup>26–29</sup>. This functional  
93 complexity is confirmed by *in vivo* analyses, with distinct roles for this factor depending on  
94 both stage and cellular context. Prior to implantation, from early to late blastocyst stages, OCT4  
95 is first required to maintain the ICM and inhibit trophoblast differentiation, then for  
96 specification of both primitive endoderm (PrE) and epiblast<sup>30–32</sup>. At later stages, the loss of  
97 OCT4 from post-implantation epiblast results in multiple abnormalities, including a general  
98 disorganisation of germ layers, impaired expansion of the primitive streak and apoptosis of  
99 primordial germ cells (PGCs)<sup>26,33–34</sup>. In primed pluripotent cells, *in vitro*, the immediate  
100 phenotype in response to inducible removal of OCT4 is a loss of E-cadherin (CDH1) and  
101 impaired adhesion<sup>35</sup>. Thus, mouse OCT4 is required to regulate pluripotency by both supporting  
102 self-renewal and establishing competence for differentiation. It is also at the heart of both  
103 primed and naïve pluripotency networks, but acting to regulate different sets of enhancers in  
104 these distinct pluripotent states<sup>5</sup>. While naïve pluripotency concerns pre-implantation and  
105 appears specific to eutherian mammals, there is support for a conserved POU5 dependent  
106 network regulating aspects of pluripotency in other species. Evidence for a conserved role of  
107 POU5s in the control of pluripotency has been obtained in frog (*Xenopus*), chick, axolotl and  
108 teleosts<sup>36–41</sup>. Similarly, the knock-down of OCT4 homologues in *Xenopus* and zebrafish lead to  
109 gastrulation phenotypes reminiscent of those observed in the mouse and similarly related to  
110 impaired cell adhesiveness<sup>35,42</sup>. In these species, which have lost the *Pou5f1* class, all  
111 pluripotency related functions are fulfilled by POU5F3 rather than POU5F1.

112 A phenotypic complementation, or rescue assay, for OCT4 has been developed in  
113 mouse ESCs, providing a means to evaluate the ability of heterologous POU5 proteins to  
114 substitute for OCT4 in the support of naïve pluripotency and in the control of the balance  
115 between self-renewal and differentiation<sup>43</sup>. POU5 proteins from different species exhibit  
116 varying abilities to rescue in this assay, irrespective of the orthology class. For instance, human,



117 platypus and axolotl POU5F1s, as well as *Xenopus* XIPOU91 (XIPOU5F3.1), one of the three  
118 POU5F3 forms identified in this species, are endowed with a similar rescue capacity, indicating  
119 that they harbour essential structural determinants required to support naïve pluripotency in  
120 mouse ESCs. In contrast, moderate or undetectable rescue ability was observed for chick and  
121 zebrafish POU5F3, respectively<sup>36,38</sup>. The existence of homologues with varying OCT4-like  
122 activity suggests that the role of this factor in pluripotency has undergone functional  
123 diversification across vertebrates. Here, we take advantage of the OCT4 complementation  
124 system to explore when POU5 proteins acquired the capacity to fulfil mouse OCT4 functions  
125 and how they evolved in the context of the duplication that gave rise to the POU5F1 and  
126 POU5F3 forms. Our results indicate that the capacity of POU5 proteins to support naïve  
127 pluripotency is a gnathostome characteristic, which emerged prior to the duplication giving rise  
128 to the *Pou5f1* and *Pou5f3* orthology classes and was elaborated in the sarcopterygian lineage.  
129 This was a result of a stepwise process, involving specialisations of the two paralogues  
130 impacting the structural orientation of two regions of the protein that allowed neo-  
131 functionalisation and reversion. Altogether, these data unveil an ancient evolutionary history  
132 for pluripotency that suggests that the states, extensively analysed in eutherians, existed long  
133 before the advent of placental development.

## 134 **Results**

### 135 **Evolutionary dynamics of the *Pou5* gene family in vertebrates**

136 Previous characterisation of *Pou5f1* and *Pou5f3* has highlighted multiple losses of either  
137 one of the two paralogues in many osteichthyan (including tetrapod) lineages<sup>24</sup>. To explore the  
138 evolutionary dynamics of the *Pou5* gene family across vertebrates, we performed a  
139 comprehensive survey of these genes in a broad sampling of vertebrates, taking advantage of  
140 available genomic databases (Supplementary Table 1). Deduced amino acid sequences were  
141 submitted to sequence comparisons, phylogenetic and synteny analyses (Fig. 1a-c,  
142 Supplementary Information 1). All vertebrate full-length coding sequences predicted from our  
143 genomic searches exhibited a very similar organisation into five coding exons, with conserved  
144 locations of intron-exon boundaries, albeit with a reverse order between exons 4-5 and 2-3 in  
145 *E. burgeri*, possibly related to a genome assembly error (Supplementary Table 1). Their  
146 assignment to the *Pou5* gene family is supported by the high level of conservation of the POU  
147 specific domain and POU homeodomain with residues identified as POU5 synapomorphies  
148 (L146<sup>(POU16)</sup>, K149<sup>(POU19)</sup>, C245<sup>(POU115)</sup>, Supplementary Information 1; ref<sup>44</sup>) and the presence  
149 of a N-terminal motif shared by all POU5 proteins (Supplementary information 1). While  
150 sequence comparisons highlight a few signature residues of osteichthyan POU5F1 and POU5F3  
151 in the POU specific domain and homeodomain (residue D/E at D205<sup>(POU75)</sup> and residue -/R  
152 between K226<sup>(POU96)</sup> – R227<sup>(POU97)</sup>; Fig. 1a; ref<sup>24</sup>), these candidate class hallmarks are not  
153 maintained in orthologous chondrichthyan sequences, suggesting the fixation of novel selective  
154 constraints in the osteichthyan lineage (Fig. 1a). Lamprey and hagfish POU5 share a number of  
155 residues not found in their gnathostome counterparts, supporting the monophyly of cyclostome  
156 POU5 (Supplementary Information 1).

157 In osteichthyans, *Pou5f1* and/or *Pou5f3*-related genes can be unambiguously identified  
158 in all species analysed. Furthermore, this analysis confirmed a complex pattern of paralogue  
159 loss/retention: (i) the presence of both forms in the last common ancestor of sarcopterygians  
160 (e.g. lungfish), (ii) independent *Pou5f1* losses/*Pou5f3* retention in actinopterygians (except  
161 reedfish), anurans (e.g. frog) and birds (e.g. emu) and (iii) independent *Pou5f3* losses/*Pou5f1*  
162 retention in eutherians (e.g. human and mouse) and squamates (e.g. lizard and snake) (Fig. 1b  
163 and Supplementary Information 1). It also resolves the timing of paralogue loss/retention events  
164 with an increased resolution. For instance, we identified an unambiguous *Pou5f3* coding  
165 sequence in the tuatara *Sphenodon punctatus* (Supplementary Table 1), which implies that the  
166 loss of this paralogue in squamates followed their split from sphenodonts. Similarly, both

167 *Pou5f1* and *Pou5f3* can be identified in the genome of *Alligator sinensis* (Fig. 1b), in line with  
168 a retention of both paralogues not only in turtles as previously documented<sup>24</sup>, but also in  
169 archosaurs, their sister group, prior to the loss of *Pou5f1* in birds. In actinopterygians, both  
170 paralogues are present in the reedfish *Erpechoichtys calabaricus*, implying that the loss of  
171 *Pou5f1* previously documented in this group followed the split between cladistians and  
172 actinopteri (Fig. 1b). In all chondrichthyans (cartilaginous fishes) analysed, we obtained robust  
173 evidence for the presence of both paralogues with full length coding sequences found in  
174 elasmobranchs, including sharks (small-spotted catshark *Scyliorhinus canicula*, white shark  
175 *Carcharodon carcharias*, brownbanded bamboo shark *Chiloscyllium punctatum*, whale shark  
176 *Rhincodon typus*) and skates (little skate *Leucoraja erinacea* and thorny skate *Amblyraja*  
177 *radiata*), as well as full length *Pou5f3* and partial *Pou5f1* sequences in the holocephalan  
178 *Callorhinchus milii* (Supplementary Table 1; Supplementary Information 1). Finally, in  
179 cyclostomes, searches in the genomes of two lampreys, *Lethenteron reissneri* and *Petromyzon*  
180 *marinus*, and in the genome of the hagfish *Eppratetus burgeri* indicated the presence of only  
181 one *Pou5*-related coding sequence in each one of these species. These coding sequences could  
182 not be assigned to either one of the gnathostome POU5F1 or POU5F3 classes based on amino  
183 acid sequence comparisons or phylogenetic analysis (Supplementary Table 1; Supplementary  
184 Information 1).

185 Synteny analyses show that gnathostome *Pou5f1* and *Pou5f3* are respectively located in  
186 conserved chromosomal environments, containing in their close vicinity orthologues of *Lsm2*,  
187 *Tcf19*, *Cchcr1*, *Ddx39b* for *Pou5f1*, and of *Fut7*, *Abca2*, *Paxx* for *Pou5f3* (Fig. 1b;  
188 Supplementary Information 1). Three pairs of paralogues shared between the *Pou5f1* and  
189 *Pou5f3* loci (*Clic1/Clic3*; *Traf2l/Traf2*; *Npdc1l/Npdc1*; Fig. 1c) and retained in  
190 chondrichthyans, actinopterygians and sarcopterygians can additionally be detected at higher  
191 chromosomal distances, in line with their presence in the ancestral locus prior to the duplication  
192 generating the two forms (Fig. 1c; Supplementary Information 1). The chromosomal  
193 environment of the unique *Pou5* gene identified in the lamprey species shares characteristics of  
194 both gnathostome *Pou5f1* and *Pou5f3* loci, including conserved linkages with *Tcf19/Cchcr1*  
195 and *Fut7* homologues as observed in the vicinity of gnathostome *Pou5f1* and *Pou5f3* genes  
196 respectively (Fig. 1b). Taken together, these data highlight the fixation of significant differences  
197 between the gnathostome *Pou5f1* and *Pou5f3* genes following the duplication, which generated  
198 them.

## 199 **Heterogeneous evolutionary rates of POU5 proteins across vertebrates**

200 In order to gain insight into the molecular constraints acting on POU5 protein sequences, we  
201 characterised their evolutionary rate variations using a bayesian Markov chain Monte Carlo  
202 algorithm. We first focused on the POU domain (containing the POU specific, linker and  
203 homeodomain) in a broad sampling of vertebrates, containing all the cyclostome and  
204 chondrichthyan sequences available and a representative sampling of osteichthyans, including  
205 teleosts, amphibians, sauropsids and mammals (Fig. 1d). This analysis indicates the occurrence  
206 of the most pronounced evolutionary rate accelerations in the branches of lamprey POU5 (after  
207 their splitting from hagfish), both mammalian and reptilian POU5F1, mammalian POU5F3 (but  
208 not sauropsid POU5F3) and the triplicate *Xenopus* POU5F3 proteins (but not their single copy  
209 counterpart in salamander). A remarkably high evolutionary rate is also observed in crocodiles  
210 for POU5F1, prior to its loss in birds (Fig. 1d). This analysis was refined for mammalian  
211 POU5F1 and actinopterygian POU5F3, using more exhaustive species sampling in these taxa  
212 and taking into account the C-terminal part of the protein in addition to the POU specific domain  
213 and homeodomain (Supplementary Information 1). In the former, higher POU5F1 evolutionary  
214 rates are observed in the lineage of therians versus monotremes and in the lineage of eutherians  
215 versus marsupials. Heterogeneities are also detected across eutherians, for example, relatively  
216 high evolutionary rates in Murinae (mouse and rats) and most rodents, as well as in Chiroptera  
217 (bats). Concerning POU5F3, an acceleration in evolutionary rate is detected early in the  
218 actinopterygian lineage, with a higher rate of evolution in the actinopterygian versus  
219 sarcopterygian (represented by a crossopterygian, coelacanth POU5F3) branch, as well as in  
220 the neopterygian (versus chondrosteian) lineage. Such an acceleration may explain the reduced  
221 capacity of zebrafish POU5F3 to support OCT4-null mouse ESCs<sup>37</sup>. This heterogeneity in  
222 evolutionary rates observed in teleosts is unlikely to be related to hidden paralogy in the context  
223 of the whole genome duplication known to have occurred early in the teleost lineage<sup>45</sup>. Both  
224 copies generated by the teleost-specific duplication of *Traf2*, *Npdc1* and *Fut7* have been  
225 retained in the teleosts analysed and, in all cases, the unique *Pou5f3* gene lies in synteny  
226 with the same paralogues (*Traf2b*, *Npdc1a*, *Fut7a*). In summary, we recurrently observe  
227 significant increases in evolutionary rates associated with paralogue gains and losses,  
228 suggesting modifications of the functional constraints acting on coding sequences. However,  
229 analysis of non-synonymous to synonymous substitution failed to reveal evidence for protein  
230 positive evolution, possibly due to the globally very high conservation of the POU specific  
231 domain and POU homeodomain.

232

## 233 **The functional capacity of different sarcopterygian POU5 paralogues to rescue OCT4-** 234 **null ESCs**

235 To explore the functional evolution of POU5F1 and POU5F3 when both genes are  
236 retained, we asked whether both paralogous proteins were able to support naïve pluripotency  
237 in a heterologous mouse OCT4-rescue assay. We first focused on sarcopterygians and examined  
238 the activities of POU5 proteins from a representative sampling of species that carry both  
239 paralogues: the coelacanth (*Latimeria chalumnae*), the axolotl (*Ambystoma mexicanum*), the  
240 turtle (*Chrysemys picta bellii*) and the tammar wallaby (*Macropus eugenii*). To better visualize  
241 evolutionary trends of POU5 activity in sarcopterygians, POU5s from species that have lost  
242 either *Pou5f1* or *Pou5f3* were included, African-clawed frog (*Xenopus laevis*) and python  
243 (*Python molurus*) (Fig. 2a). Among the three *Pou5f3* paralogues produced by tandem gene  
244 duplications in the frog, only two (*XIPou5f3.1* and *XIPou5f3.2*, encoding for X91 and X25  
245 proteins, respectively) were analysed, as the third one (*XIPou5f3.3*; *X60*) is dispensable for  
246 normal development (Fig. 2a). To assess POU5 activity in supporting pluripotency, we used an  
247 *Oct4*<sup>-/-</sup> mouse ESC line carrying a tetracycline (Tc)-suppressible *Oct4* transgene (ZHBTe4)<sup>27</sup>.  
248 We introduced cDNAs encoding heterologous POU5 proteins (coding sequences listed in  
249 Supplementary Table 1) into ZHBTe4 cells (in the presence or absence of tetracycline) and  
250 determined the rescue potential relative to a mouse OCT4 (mOct4) cDNA control (Fig. 2b).  
251 Upon OCT4 loss, ESCs differentiate towards trophoblast, while OCT4 over-expression (when  
252 both heterologous cDNA and the *Oct4* transgene are expressed simultaneously) induces  
253 differentiation towards extra-embryonic mesoderm and endoderm<sup>27</sup>. With the OCT4-rescue  
254 assay we can assess the capacity of heterologous proteins to support an undifferentiated ESC  
255 phenotype in the absence of mOct4, as well as the capacity to induce differentiation when  
256 expressed in the presence of mOct4 (over-expression). The degree to which a particular POU5  
257 rescued mOct4 activity was assessed based on a colony formation assay, comparing the number  
258 of alkaline phosphatase positive colonies (AP<sup>+</sup>; purple) in the presence versus the absence of  
259 tetracycline (rescue index) (Fig. 2c, upper panel).

260 We found that all POU5F1 orthologues from species with either one or two POU5  
261 homologues could rescue OCT4-null ESCs, producing both high levels of undifferentiated  
262 colonies (AP<sup>+</sup>) and high rescue indices (Fig. 2c-d, Supplementary Fig. 1a-d). In contrast, the  
263 colonies produced by any of the POU5F3 orthologues, except X91, had varied morphologies  
264 and overall lower rescue indices (Fig. 2c-d, Supplementary Fig. 1a-b). The majority of  
265 POU5F3-rescued colonies retained an undifferentiated centre (AP<sup>+</sup>) surrounded by unstained  
266 differentiated cells (Fig. 2d). Quantification of the distinct morphologies produced by these

267 POU5-rescued colonies shows that all POU5F1 proteins produced high percentages of  
268 undifferentiated colonies, while POU5F3 proteins supported high numbers of mixed and  
269 differentiated colonies (Fig. 2e). Taken together, these observations support the notion that  
270 sarcopterygian POU5 paralogues evolved distinct abilities to support pluripotency and self-  
271 renewal.

272

### 273 **POU5F1 and POU5F3 support distinct ESC phenotypes**

274 To understand the differences between ESCs supported by the different POU5 proteins,  
275 we generated stable cell lines from either POU5F1- or POU5F3-rescued colonies (strategy  
276 summarised in Fig. 3a) and confirmed that all cell lines were maintained solely by the  
277 heterologous POU5s (Fig. 3b, Supplementary Fig. 2a-c, e). After several passages, almost all  
278 clonal lines supported by POU5F1 showed sustained self-renewal and expanded better than  
279 those supported by POU5F3 (Supplementary Fig. 2d). POU5F1-rescued ESCs resembled  
280 mOct4-rescued controls with homogenous E-cadherin (CDH1) expression and the majority of  
281 cells KLF4-positive (Fig. 3b-c). In contrast, POU5F3-rescued ESCs showed mixed  
282 morphologies (except for frog X91), with cells expressing either trophectoderm (TE; CDX2<sup>+</sup>)  
283 or primitive endoderm (PrE; GATA6<sup>+</sup>) markers (Fig. 3b-c). Moreover, ESCs supported by  
284 coelacanth, axolotl or tammar wallaby POU5F3s were prone to differentiate toward TE, while  
285 frog X25-rescues differentiated toward PrE and turtle POU5F3-rescues toward both TE and  
286 PrE (Fig. 3b-c). Consistent with our previous observations<sup>35,38</sup>, frog X91-rescues were  
287 indistinguishable from those supported by mOct4 or the other POU5F1 proteins (Fig. 3b-c).

288 In agreement with the protein expression data, qRT-PCR showed that POU5F1-rescues  
289 expressed high levels of the naïve markers *Esrrb* and *Prdm14* and low levels of the TE marker  
290 *Cdx2*, while the reverse generally held true for POU5F3 homologues (with the exception of  
291 frog X91) (Fig. 3d). Python POU5F1-rescues expressed *Nanog*, *Prdm14*, *Klf4* and *Fgf4* to  
292 similar levels as mOct4-rescued cells, suggesting that POU5F1 from species that have lost  
293 POU5F3 have similar capacity to support naïve ESC self-renewal (Supplementary Fig. 2f).

294

### 295 **The ability of POU5s to support ESC self-renewal correlates with induction of** 296 **pluripotency**

297 To test the functionality of the different POU5 homologues in another context, we  
298 compared their capacity to support ESC self-renewal with their ability to induce  
299 reprogramming. In frog embryos, X60 is expressed maternally and down regulated at  
300 gastrulation, both X91 and X25 are expressed in cells about to undergo germ layer induction<sup>38</sup>



301 and only X91 is expressed in PGCs<sup>46</sup>, correlating with its capacity to rescue OCT4-null ESCs.  
302 To explore the ability of these proteins to induce a pluripotent state, as well as monitor  
303 reprogramming dynamics, we used a mouse embryonic fibroblast (MEF) line containing a  
304 green fluorescent protein expressed from the Nanog locus (Nanog-GFP; Fig. 4a).  
305 Reprogramming was performed using a stoichiometric ratio-based infection of equivalent  
306 amounts of retroviruses encoding the three factors KLF4, SOX2, c-MYC and a POU5 protein:  
307 mOct4, X91 or X25. While both mOct4 and X91 were able to induce Nanog-GFP<sup>+</sup> colonies,  
308 X25 could not. (Fig. 4b, upper panel). However, Nanog-GFP<sup>+</sup> colonies could be obtained when  
309 the dosage of X25 was increased to a 5:1:1:1 ratio with the viruses encoding the other factors  
310 (Fig. 4b, lower panel). When compared side by side, X91-iPSCs exhibited less spontaneous  
311 differentiation and higher levels of NANOG and SSEA1 (Fig 4c, Supplementary Fig. 3a).  
312 Despite the induction of endogenous OCT4 (Fig. 4c), X25-iPSCs exhibited an extensive  
313 NANOG negative population (seen in only one X91-iPSC clone), similar to the spontaneous  
314 differentiation observed in X25-rescued ESCs (Fig. 3, b and c). Additionally, we observed  
315 heterogeneous expression of the pluripotency markers c-KIT and PECAM-1, both within and  
316 across different iPSC clones (Fig 4d), with the lowest number of completely reprogrammed  
317 cells, both Nanog-GFP<sup>+</sup> and c-KIT<sup>+</sup>, in X25-iPSCs (Supplementary Fig. 3b). The enhanced  
318 capacity of X91 to induce naïve pluripotency was also observed in a higher naïve gene  
319 expression signature (Fig. 4e). Similarly, tammar wallaby POU5 proteins (MeP1 and MeP3)  
320 could induce AP<sup>+</sup> iPSCs, although MeP1 was significantly more efficient, correlating with their  
321 distinct rescue indices (Supplementary Fig. 3c-d; Fig. 2). Taken together, the difference in  
322 reprogramming ability of POU5 proteins validates the functional divergence with regard to  
323 pluripotency, as seen in the OCT4-rescue assay.

324

### 325 **Sarcopterygian POU5s exhibit functional segregation of naïve versus primed** 326 **pluripotency**

327 The functional analyses discussed above suggest that in sarcopterygians retaining both  
328 POU5F1 and POU5F3, the former has an enhanced ability to support naïve pluripotency while  
329 the latter supports a less stable pluripotent state, giving rise to higher levels of spontaneous  
330 differentiation. To characterise this functional divergence and generate a more comprehensive  
331 picture of the cell states supported by POU5F1 or POU5F3, we analysed the transcriptome of  
332 OCT4-null ESCs rescued by each paralogue. For this analysis, we focused on the coelacanth  
333 POU5F1 (LcP1) and POU5F3 (LcP3) forms, which diverged from their tetrapod counterparts  
334 around 400 million years ago and exhibit slow rates of evolution (Fig. 1d; Fig. 2a).



335 Global gene expression analysis on three independent clones for each rescue: LcP1,  
336 LcP3 and mOct4, identified 4903 differentially expressed genes (ANOVA with 2-fold change  
337 and False Discovery Rate (FDR)  $\leq 0.05$ ). We used Morpheus to hierarchically cluster all  
338 significantly changing genes based on mean Euclidean distance. The clustering, visualised as a  
339 heatmap (Fig. 5a), showed that LcP1-rescued cells were similar to mOct4-rescued cells.  
340 Furthermore, naïve pluripotency markers, including germ cell markers, were found in clusters  
341 of highly expressed genes in both LcP1- and mOct4-rescued cells while primed pluripotency  
342 markers were present in clusters of highly expressed genes in LcP3-rescued cells (Fig. 5a). We  
343 also performed pairwise comparisons to explore the subtle differences in global gene  
344 expression. This analysis confirmed that the patterns of up-regulated and down-regulated genes  
345 of mOct4-rescued cells and LcP1-rescued cells were very similar (Fig. 5b left panel). We next  
346 performed GO enrichment analysis on the 605 genes up-regulated in both mOct4 and LcP1-  
347 rescued cells compared to LcP3 and identified various naïve state-related categories, e.g. stem  
348 cell population maintenance and reproductive process (Fig. 5c top panel). In addition, we found  
349 that among the reproduction-related genes up-regulated in both mOct4 and LcP1-rescues, most  
350 genes were related to germ cell development, such as spermatogenesis and female gamete  
351 generation (Supplementary Fig. 4a). We next identified a set of 1199 genes that were expressed  
352 specifically in LcP3-rescued cells and enriched for GO terms including cell junction and tissue  
353 development (Fig. 5c lower panel, Supplementary Table 2). Both E-cadherin (*Cdh1*) and N-  
354 cadherin (*Cdh2*), as well as other adhesion markers, were significantly up-regulated in POU5F3  
355 as compared to POU5F1-rescued cells (Supplementary Fig. 4b). This link between POU5F3  
356 proteins and positive regulators of adhesion is consistent with what we have previously  
357 described<sup>34</sup> for POU5 protein function as safeguarding epithelial integrity at gastrulation and  
358 blocking differentiation as a consequence of epithelial to mesenchymal transition (EMT).  
359 Furthermore, among genes common to LcP3- and mOct4-rescued cells, 31 genes were EpiSCs  
360 specific (compared to ESCs<sup>47</sup>) and were associated with cell adhesion and extracellular matrix  
361 (Supplementary Fig. 4b). In summary, the distinct transcriptomic profiles of ESCs supported  
362 by LcP1 and LcP3, suggests alternative roles for these paralogues in naïve versus primed  
363 pluripotency, respectively.

364 To test the hypothesis that paralogous POU5 proteins have specialized to support either  
365 naïve or primed pluripotency, we assessed the ability of both LcP1 and LcP3 to sustain different  
366 pluripotent states. Thus, we adapted POU5-rescued cells to either a defined naïve culture with  
367 inhibitors of MEK, GSK3 and LIF (2iL), a culture condition that approximates an intermediate  
368 pluripotency state, known as rosette-like<sup>13</sup> or a primed culture Epiblast-like cells (EpiLC)<sup>47</sup>

369 (Fig. 5d). In line with the transcriptome analysis (Fig. 5a-c), LcP3-rescued cells showed higher  
370 levels of primed gene expression in standard serum/LIF (SL) culture (Fig. 5e and  
371 Supplementary Fig. 4c). While all rescued cells appeared to eventually adopt a naïve state in  
372 2iL conditions, LcP1 and mOct4-rescued cells adapted faster and showed normal 2iL  
373 morphology (Fig. 5d-e). In rosette medium, LcP3-rescued cells showed the highest level of  
374 *Otx2*. Finally, when differentiated to EpiLCs, mOct4 and LcP3-rescued cells more effectively  
375 up-regulated primed pluripotency markers *Cdh2*, *Oct6* and *Fgf5* (Fig. 5e). Taken together, our  
376 data suggest a functional segregation of the sarcopterygian POU5s, with POU5F1 supporting  
377 naïve pluripotency and POU5F3 supporting a primed pluripotency gene regulatory network  
378 associated with later stages of development, multi-lineage differentiation and gastrulation.

379

### 380 **POU5-mediated mammalian pluripotency first emerged after the gnathostome-** 381 **cyclostome split.**

382 To gain insight into the origin of POU5 pluripotency maintenance activity in vertebrates  
383 and into the timing of its functional partitioning between POU5F1 and POU5F3 paralogues in  
384 the gnathostome lineage, we analysed the expression pattern of chondrichthyan *Pou5* genes and  
385 assessed functionality with the OCT4-rescue assay. We focused on paralogues from one batoid  
386 (little skate *Leucoraja erinacea*) and two selachians (whale shark *Rhincodon typus* and small-  
387 spotted catshark *Scyliorhinus canicula*). Furthermore, we included the unique POU5 identified  
388 in the cyclostome hagfish *Eptatretus burgeri*, which harbours a slowly evolving deduced  
389 protein sequence compared to its counterpart in lampreys (Fig. 1d) and is therefore more likely  
390 to retain ancestral activities. A simplified phylogenetic tree of the species tested for their POU5  
391 function is depicted in Fig. 6a. First, we analysed the expression of catshark *Pou5f1* (*ScPou5f1*)  
392 and *Pou5f3* (*ScPou5f3*) from blastocoel formation to neural tube closure (Fig. 6b and  
393 Supplementary Information 2). These data show a very similar expression profile for *ScPou5f1*  
394 and *ScPou5f3*, with both being broadly expressed in the early embryo, prior to the establishment  
395 of the major embryonic lineages (Fig. 6b, i-vi and viii-xiii). At later stages of development,  
396 their territories segregate and each paralogue exhibits expression specificities, such as  
397 developing PGCs selectively expressing *ScPou5f1* (Fig. 6b, vii) or the anterior hindbrain and  
398 tailbud expressing *ScPou5f3* only (Fig. 6b, xiv-xvi).

399 We then tested the ability of catshark POU5 proteins (ScP1 and ScP3) to support  
400 pluripotency using the OCT4-rescue assay (Fig. 2b). Due to a missing N-terminal domain  
401 sequence in *ScPou5f1* and based on our finding that the POU domains from frog X91  
402 sufficiently converted the activity of X25 into a POU5F1-like function in the OCT4-rescue

403 assay (Supplementary Fig. 5a-b), we assessed the functionality of ScP1 using a chimeric protein  
404 containing the POU domains of ScP1 and the N- and C-terminal domains of ScP3 (named S313)  
405 (Fig. 6c). While the chimeric construct was able to support ESC colony formation, differences  
406 between the chimeric catshark POU5F1- and POU5F3-supported colonies were hard to  
407 distinguish (Fig. 6c-d).

408 Next, we assessed POU5 homologues from the other chondrichthyans (whale shark *R.*  
409 *typus* and little skate *L. erinacea*) and a cyclostome species (hagfish *E. burgeri*). The number  
410 of AP<sup>+</sup> colonies generated in this OCT4-rescue assay showed that both POU5F1 and POU5F3  
411 proteins from whale shark and little skate (respectively RtP1, RtP3, LeP1 and LeP3) were able  
412 to partially support ESC self-renewal in the absence of OCT4, with variable colony  
413 morphologies (Fig. 6e). In contrast, hagfish POU5 (EbP5) completely lacked rescue capacity.  
414 Unlike sarcopterygians, the average rescue indices obtained with the chondrichthyan  
415 paralogues were comparable and generally lower than those obtained with the mOct4 control  
416 (Fig. 6f).

417 To better characterize the functionality of chondrichthyan POU5s, we expanded rescued  
418 ESC colonies (cultured in SL +Tc) to generate stable clones and analysed the expression of  
419 pluripotency and differentiation markers. As the hagfish POU5 was unable to support any  
420 colony formation, clonal lines were generated in the presence of *Oct4* transgene (SL -Tc) and  
421 later characterized following subsequent OCT4 removal (Supplementary Fig. 5c). We  
422 confirmed that all rescued lines expressed similar levels of both heterologous cDNAs  
423 (Supplementary Fig. 5d) and exogenous POU5 proteins (Fig. 6g; Supplementary Fig. 5e). Any  
424 variations in the expression of these POU5 proteins did not correlate with their ability to rescue  
425 OCT4 activity in ESCs (Supplementary Fig. 5f).

426 Differences in cellular phenotypes between chondrichthyan POU5F1/3-rescued cells  
427 were assessed by immunostaining and qRT-PCR. All rescued lines exhibited a modest level of  
428 undifferentiated cells (KLF4<sup>+</sup>) with the exception of EbP5-rescued cells. EbP5-rescues, fixed  
429 five days after Tc addition, exhibited similar levels of CDX2 expression as un-rescued control  
430 ZHBTc4 cells (Empty) (Fig. 6g). The capacity of chondrichthyan POU5s to rescue pluripotency  
431 was confirmed by qRT-PCR, with robust, but variable expression of *Nanog*, *Prdm14* and *Esrrb*  
432 (Fig. 6h). Even though chondrichthyan POU5s appeared to support expression of pluripotency  
433 genes, they all exhibited low expression of differentiation markers, such as *Cdx2* and *Fgf5* (Fig.  
434 6g-h). Taken together, these data show that all tested chondrichthyan POU5s have some  
435 capacity to support mouse ESC self-renewal, with roughly equivalent activities between  
436 paralogues, while this capacity is totally absent in the hagfish POU5. This suggests that the

437 determinants underlying specialized POU5 pluripotency-related activities emerged in the  
438 gnathostome lineage, after the cyclostome-gnathostome split.

439

#### 440 **Structural modelling of POU5 paralogues predicts conserved 3D-elements across** 441 **vertebrates with the position of specific helices correlating with function in pluripotency**

442 As the POU domains in different homologues, including cyclostomes, have both highly  
443 conserved and less conserved regions at the amino acid level (Supplementary Fig. 6), and  
444 exhibited variable capacity to rescue OCT4 function, we asked if this difference was reflected  
445 at the three-dimensional level of the proteins. For this purpose, we calculated structural  
446 predictions for all POU5 homologues using AlphaFold2, an AI system developed by DeepMind  
447 to predict three-dimensional protein structures based on their amino acid sequences<sup>48</sup>.  
448 AlphaFold2 outputs include measurements of confidence per residue, termed pLDDT, on a  
449 scale from 0-100. In all POU5 models, AlphaFold2 predicted the presence of helices in the  
450 POU-specific domain (POU-S;  $\alpha$ -helices 1-4) and in the POU homeodomain (POU-HD;  $\alpha$ -  
451 helices 1-3), with folds and most positions being predicted with “very high” confidence  
452 (pLDDT>90). In addition, the beginning of the linker between the POU-S and POU-HD was  
453 predicted as a helix (Linker  $\alpha 1'$ ), but with variable degrees, from “confident” (90>pLDDT>70)  
454 to “low” confidence (70>pLDDT>50). The region between linker  $\alpha 1'$  and POU-HD as well as  
455 the N- and C-terminal tails were predicted with “low” to “very low” (pLDDT<50) model  
456 confidence, suggesting that the latter are unstructured (Supplementary Information 3).

457 To compare the structures from different species, we asked how the two POU domains,  
458 the POU-S (including the linker  $\alpha 1'$ ) and the POU-HD, potentially interacted with DNA. We  
459 compared them to an existing crystal structure of mOct4 bound to the *PORE* (Palindromic Oct  
460 factor Recognition Element) DNA element (PDB ID: 3L1P, ref<sup>49</sup>). We created POU5-*PORE*  
461 DNA structural prediction models for each POU5 homologue by 3D-aligning isolated POU  
462 domains with selected conserved amino acid sequences of mOct4 (from PDB 3L1P) and  
463 combined them with the 3D coordinates of the *PORE* DNA (from PDB 3L1P). We performed  
464 geometry validation and minimization of the resulting POU5-*PORE* DNA models to prevent  
465 geometrical clashes (Supplementary Information 3). Before further analysis, isolated structures  
466 were verified by Phenix (structural assessment using MolProbity) to ensure a low clash score  
467 (cut-off at ten, compared PDB: 3L1P OCT4 on *PORE*<sup>49</sup>) and to ensure that the analysed residues  
468 were Ramachandran favoured (Supplementary Information 3). Finally, we examined how the  
469 newly modelled protein-DNA interfaces differed in terms of folds, hydrogen bonding patterns

470 and electrostatic interactions between the POU5 homologue structures and the original mOct4-  
471 *PORE* structure.

472 The super-imposition of all POU5-*PORE* DNA models with mOct4-*PORE* showed  
473 similar positioning of all helices, except linker  $\alpha 1'$  ( $L\alpha 1'$ ), with hagfish having the greatest shift  
474 in position, suggesting a correlation with its inability to rescue mOct4 activity (Supplementary  
475 Fig. 7a). Furthermore, we observed a shift in the orientation of the second helix of the POU-S  
476 domain ( $S\alpha 2$ ) when comparing coelacanth and hagfish proteins (Figure 7a). We then examined  
477 the predicted hydrogen bonding (H-bond) interactions between the POU-S-L/POU-HD residues  
478 and the *PORE* DNA element for all homologues (Supplementary Fig. 7b). Generally, the  
479 predicted protein:DNA H-bonds involved residues located in helices previously reported to  
480 interact with DNA<sup>49</sup> and residues conserved across all species (Supplementary Figures 6 and  
481 7b). Specifically, predicted H-bonds observed in all species, involved residues in the fully  
482 conserved third helix of the POU-S domain (Q157<sup>(POU27)</sup>, Q174<sup>(POU44)</sup>, and T175<sup>(POU45)</sup>) and the  
483 mostly conserved third helix of the POU-HD (N273<sup>(POU143)</sup>); of note, Q174<sup>(POU44)</sup> and  
484 N273<sup>(POU143)</sup> have been reported to be essential for iPSCs generation<sup>49</sup> (Supplementary Figures  
485 6 and 7b). The greatest variation in H-bonds between homologues was predicted for POU-HD  
486 residues, showing both species and paralogue-specificity, but not correlating with naïve vs  
487 primed POU5 activity.

488 As the structural changes observed in different POU5 proteins occurred in mOct4  
489 regions identified as essential for reprogramming and support of pluripotency<sup>49-54</sup> (Figure 7b  
490 and Supplementary Fig. 6), we sought to identify the sequences responsible for these structural  
491 shifts. For this purpose, we generated a series of *in silico* predictions for chimeras containing  
492 elements of the coelacanth POU5F1 and hagfish POU5, focusing on regions less conserved in  
493 cyclostomes (Figure 7b, red percentages). The largest swap contained the full region from  $S\alpha 4$   
494 to second helix of the POU-HD ( $H\alpha 2$ ), with the others containing sections of this region (Fig.  
495 7c). The structures show that only the EbP5<sup>S4LH2</sup> and EbP5<sup>LH2</sup> chimeras could re-align  $L\alpha 1'$  and  
496  $S\alpha 2$ , which were shifted in the hagfish POU5, as compared to mOct4 (Fig. 7d and  
497 Supplementary 7c). In particular, the linker together with  $H\alpha 1-2$  from LcP1 were required to  
498 bring  $S\alpha 2$  of EbP5 back in close proximity with  $L\alpha 1'$ , making the interaction of key residues  
499 (the interface formed by L210<sup>(POU80)</sup> and Q211<sup>(POU81)</sup> with Y/F155<sup>(POU25)</sup>) more favourable (Fig.  
500 7d, box 1, Supplementary Fig. 7c). Furthermore, we investigated the electrostatic surface  
501 potentials of the POU5-*PORE* structural models, specifically focusing on the solvent-exposed  
502 surface areas with low amino acid sequence conservation,  $S\alpha 2$ ,  $S\alpha 4$ ,  $L\alpha 1'$  and  $H\alpha 1-2$   
503 (Supplementary Fig. 8). While we observed general differences in surface charge distribution

504 between homologues, the hagfish POU5 solvent-exposed surfaces appeared to be the most  
505 neutral. Specifically, the surface charge distribution observed in the region of S $\alpha$ 2 and L $\alpha$ 1'  
506 was rescued by chimeric proteins EbP5<sup>S4LH2</sup> and EbP5<sup>LH2</sup>, but not by EbP5<sup>S4L</sup> or EbP5<sup>H1H2</sup> (Fig.  
507 7e). Similarly, when mOct4-mSox2 polar contacts were predicted (from PDB 6HT5), we found  
508 that EbP5 had two additional interactions that were not in mOct4 and were rescued in EbP5<sup>S4LH2</sup>  
509 and EbP5<sup>LH2</sup> (Fig. 7f). Taken together, our *in silico* modelling suggests that the region including  
510 the linker and the first two helices of the homeodomain play a key role in orienting the structure,  
511 resulting in specific helix-helix and protein-protein interactions.

512 To test whether the re-orientation of L $\alpha$ 1' and S $\alpha$ 2 was sufficient to support  
513 pluripotency *in vitro*, we engineered two chimeras, EbP5<sup>S4LH2</sup> and EbP5<sup>LH2</sup>, and evaluated their  
514 functionality using the OCT4-rescue assay (Fig. 2b; Fig. 8a). Both chimeras supported  
515 formation of undifferentiated colony, but showed differences in their proliferative ability, as  
516 seen by the reduced size of the EbP5<sup>LH2</sup>-rescued colonies (Fig. 8b, c). To understand the  
517 phenotypic differences between EbP5<sup>S4LH2</sup> and EbP5<sup>LH2</sup>-rescued cells, we established clonal  
518 cell lines with stable chimeric protein expression (Fig. 8d) and compared their gene expression  
519 profiles by qRT-PCR (Fig. 8e). Both chimeras supported the expression of key pluripotency  
520 markers, such as *Nanog*, *Prdm14*, *Esrrb* and *Fgf4* and efficiently suppressed *Cdx2* expression,  
521 similarly to mOct4 and LcP1.

522 In conclusion, with a combination of sequence alignments, structural modelling and  
523 domain swapping, we pinpointed the region of gnathostome POU5F1 that is sufficient to inhibit  
524 differentiation and support naïve ESC self-renewal in the absence of mOct4. This suggests that  
525 the 3D position of the linker and the regions flanking it may have been key evolutionary targets  
526 for the establishment of an Oct4-centric gene regulatory network associated with pluripotency.



## 527 Discussion

528 Here we show that since their emergence in vertebrates, POU5 proteins have undergone  
529 a complex step-wise evolution, enabling the eventual emergence of the naïve and primed  
530 pluripotency states of mammals. This evolutionary history involves the segregation and  
531 integration of multiple spatial and temporal inputs into a core network safe-guarding cell  
532 potency, which can be traced back to the origin of gnathostomes (Fig. 9).

533 Pinpointing the timing of gene losses and duplications is an essential stepping stone in  
534 understanding functional evolution of a multigene family. The identification of *Pou5f1* and  
535 *Pou5f3* orthologues in chondrichthyans and a single gene in cyclostomes, without a clear  
536 relationship to a specific class, indicates that the gene family emerged in the vertebrate lineage  
537 prior to the split between gnathostomes and cyclostomes, and that the *Pou5f1/Pou5f3*  
538 duplication predated gnathostome radiation (Fig. 9). Analysis of key amino acid positions  
539 supports the monophyly of the group containing the lamprey and hagfish *Pou5* genes, in line  
540 with the phylogenetic position of these species and of the group containing both gnathostome  
541 paralogues<sup>55</sup>. The detection of extended conserved synteny between gnathostome *Pou5f1* and  
542 *Pou5f3* loci suggests that the duplication generating these two forms was a part of the two  
543 rounds of whole genome duplications (WGDs) that took place in early vertebrate evolution<sup>56,57</sup>.  
544 The timing of these two rounds was recently clarified, with the first round occurring prior to  
545 the gnathostome-cyclostome split, and the second one occurring in the gnathostome lineage,  
546 prior to its radiation<sup>58</sup>. The detection of extended synteny between the gnathostome *Pou5f1*  
547 and *Pou5f3* loci indicates that these classes were generated by a large-scale, possibly genome  
548 wide, duplication event and the monophyly of gnathostome *Pou5* supported by our sequence  
549 analyses further suggests that this duplication may have been part of the second round of  
550 vertebrate WGD (Supplementary Fig. 9a-c).

551 A key finding of our OCT4-rescue assay is that the hagfish POU5 protein is unable to  
552 support pluripotency, while all osteichthyan POU5F1 or POU5F3 proteins tested exhibit some  
553 capacity to do so. This also holds true for chondrichthyan POU5 proteins, although the degree  
554 to which they support pluripotent phenotypes is variable. Altogether, this indicates that the  
555 origin of the structural determinants, which underlie the regulation of the OCT4-centric  
556 pluripotency network in ESCs, can be traced back to the origin of gnathostomes, prior to the  
557 duplication, which generated the two classes. The broad expression of both paralogues in  
558 chondrichthyans combined with their similar modest functional activity is consistent with



559 potential roles in germ cell and gastrulation stage pluripotency, suggesting these properties were  
560 fixed early in the gnathostome lineage.

561 Our systematic search for *Pou5* genes in a broad sampling of gnathostomes shows that  
562 despite losses of either paralogue (ref<sup>24</sup>; this study), both *Pou5f1* and *Pou5f3* were retained at  
563 the base of the chondrichthyan, actinopterygian and sarcopterygian lineages, as well as in the  
564 last common ancestor of actinistians, amphibians, sauropsids and mammals (Fig. 9). This  
565 suggests that distinct selective forces acted to preserve both paralogues shortly after duplication,  
566 in agreement with evolutionary models for maintenance of duplicate genes<sup>59</sup>. In line with an  
567 early specialization of each form in gnathostomes, chondrichthyan POU5F1 and POU5F3  
568 display unique expression characteristics, selectively maintained in osteichthyans. For instance,  
569 in the catshark, the anterior hindbrain expresses *Pou5f3*, similar to chick, frog and  
570 zebrafish<sup>36,38,60,61</sup>—while the developing yolk sac endoderm exhibits a *Pou5f1* expression  
571 reminiscent of *Oct4* in the primitive endoderm of mammals<sup>30,62</sup>. These territories may reflect  
572 ancient class-specific expression features, fixed prior to gnathostome radiation, which  
573 contributed to the early preservation of both paralogues, either by neo-functionalisation, or  
574 duplication-degeneration-complementation. A dosage selection effect may also have been  
575 involved, consistent with the expression of the two catshark paralogues and with the dose  
576 sensitivity of OCT4 in ESCs<sup>27</sup>. This initial expression diversification of the two classes at the  
577 gene level may have paved the way to subsequent specializations at the protein level, further  
578 contributing to their maintenance. In agreement, our analysis shows that sarcopterygian  
579 POU5F1 orthologues, from species harbouring both paralogues, were significantly more able  
580 to support naïve pluripotency, while POU5F3s showed a higher capacity to support primed  
581 pluripotency, unlike chondrichthyan paralogues. These findings suggest that the dual  
582 functionality observed for mOct4, has an alternative resolution in sarcopterygians that retain  
583 both genes, through the segregation of paralogues into either naive or primed pluripotency  
584 functions. Specialisation of duplicates is consistent with an evolutionary mode of escape from  
585 adaptive conflict, whereby the duplication of an ancestral bi-functional gene results in the  
586 specialisation of each paralogue, optimising its capacity to fulfil one function, while impeding  
587 its capacity to perform the other<sup>59</sup>. We propose that this process led to a functional  
588 diversification of POU5F1 and POU5F3 proteins early in the osteichthyan lineage, such that  
589 POU5F1 orchestrated the preservation of the germ line, insulating it from extrinsic  
590 differentiation signals, while POU5F3 specialised to manage gastrulation specific signals,  
591 through the regulation of adhesion, migration and differentiation.

592 Even though the functional specialisation of POU5F1 and POU5F3 appeared to be  
593 maintained in a number of sarcopterygian taxa, our data highlight multiple losses of either one  
594 of the two paralogues (Fig. 9). How can organisms cope with the loss of genes harbouring  
595 specialised functions? Perhaps evolutionary innovation focused on the region that was  
596 responsible for the emergence of the POU5-centric pluripotency network. Supporting this idea,  
597 we found a coding sequence in LcP1 that influences key structural elements in POU5 proteins  
598 and conveys POU5 activity to the hagfish protein, not only endowing this protein with  
599 chondrichthyan-like POU5 activity, but with POU5F1-like capacity to support naïve  
600 pluripotency. Central to these structural elements are a number of residues that are crucial for  
601 the support or induction of pluripotency by mOct4 (Fig. 7b and Supplementary Fig. 6), such as  
602 the POU-S domain residues D159<sup>(POU29)</sup> required for the mOct4-mSox2 interaction and iPSC  
603 formation<sup>53</sup> and V166<sup>(POU36)</sup> required for optimal reprogramming<sup>49</sup>. In addition, multiple  
604 positions in the first helix of the linker region have been identified as important for  
605 reprogramming<sup>49</sup>, including positions N206<sup>(POU76)</sup>, N207<sup>(POU77)</sup>, N209<sup>(POU79)</sup>, L210<sup>(POU80)</sup> and  
606 Q211<sup>(POU81)</sup>. Simultaneous mutation of N206<sup>(POU76)</sup>, N207<sup>(POU77)</sup>, N209<sup>(POU79)</sup> and L210<sup>(POU80)</sup>  
607 abolishes OCT4-rescue activity<sup>49</sup>. However, all of these amino acids are ultimately conserved  
608 in both POU5F1 and POU5F3, and as result their identity does not explain the differences in  
609 naïve versus primed pluripotency observed here. Therefore, we looked for residues that were  
610 unique to the specific paralogues. Although we identified variations within the linker, no  
611 obvious naïve motif was apparent. While position D205<sup>(POU75)</sup> in mOct4 is conserved in LcP1,  
612 but is an E in LcP3, the RK motif in LcP3 contains an extra R and there is homeodomain  
613 position, L250<sup>(POU120)</sup>, that is conserved in mOct4 and LcP1, but is a S in LcP3. However, these  
614 specific differences are not found in X91, have not been identified via mutational screens, and  
615 have no clear assigned function. Therefore, it is not our contention that these residues give  
616 POU5F1 its capacity to support naïve pluripotency. Instead, we favour an explanation that  
617 involves the coevolution of multiple changes that preserve the structural integrity of protein-  
618 protein interaction surfaces, including the influence of positions in the homeodomain on the  
619 structure of the linker and the POU-S domain. In *Xenopus*, where loss of *Pou5f1* was followed  
620 by gene duplication, one of the three POU5F3 proteins evolved the ability to support a naïve-  
621 like pluripotency. Sequence comparisons highlighted a rapid rate of evolution and extensive  
622 divergence of the POU domain relative to other POU5F3 proteins, suggesting multiple  
623 compensatory interactions that could re-orient the two key structural motifs discussed here.

624           Upon the loss of a paralogue, perhaps higher concentrations of the remaining POU5  
625 could compensate for the loss of the other form and any co-evolved binding partner specificity;  
626 potentially also resulting diversifications of developmental strategies. For instance, the timing  
627 and mechanism whereby PGCs segregate from somatic cells extensively vary across  
628 metazoans, and the study of model organisms has highlighted two radically different modes:  
629 pre-formation and epigenesis. The first relying on an early specification by maternal  
630 determinants, while the second depends on a later induction from surrounding tissues<sup>63</sup>.  
631 Intriguingly, all osteichthyans that have lost *Pou5f1* employ pre-determination, a derived trait  
632 in vertebrates (chick, *Xenopus*, sturgeon, zebrafish<sup>63,64</sup>), while closely related species that have  
633 retained this paralogue use induction, such as the axolotl in amphibians, or the turtle in  
634 amniotes<sup>65,66</sup>. This correlation suggests that an epigenesis strategy for PGC specification was a  
635 driving force to preserve *Pou5f1* in osteichthyans, in line with the specialisation of the protein  
636 into naïve pluripotency. This selective constraint was relaxed upon the transition to a pre-  
637 formation mode, involving an early determination of the germ line. Supporting this hypothesis,  
638 a remarkably high evolutionary rate of POU5F1 is observed in crocodylians, while the gene is  
639 lost in the bird lineage. The biological significance of the *Pou5f3* losses observed in eutherians  
640 and squamates is less clear. While mouse and human OCT4 have robust capacity to support  
641 primed and naïve pluripotency, we have also found a similar naïve POU5F1 activity in snakes.  
642 The specific expression of the *Pou5f3* class in the anterior hindbrain and tailbud, as well as their  
643 support of primed pluripotency, suggest that related developmental processes may have  
644 diversified. All sarcopterygian POU5F1 proteins tested were endowed with the capacity to  
645 repress spontaneous trophoblast differentiation in ESC cultures. This property was not shared  
646 by chondrichthyan POU5 proteins, but is clearly encoded in the region spanning the POU-S-L  
647 and POU-HD domains encoded in the earliest sarcopterygian POU5F1 (coelacanth) tested and  
648 can be transferred to heterologous proteins. These data suggest an early emergence of the  
649 corresponding structural determinants of POU5 proteins in gnathostomes, followed by an  
650 elaboration phase taking place selectively in the POU5F1 lineage, after the gnathostome  
651 radiation. In line with this hypothesis, repression of a *Cdx* family member by POU5 proteins  
652 has been reported in *Xenopus*<sup>38</sup>, and *Cdx2*, *Pou5f1* and *Pou5f3* expression at the level of  
653 elongating posterior arms in the catshark are consistent with an ancient origin of this regulatory  
654 node (this study; ref<sup>48</sup>). A key innovation of mammals may have been its co-option into the  
655 developmental context of the blastocyst, regulating the trophoblast lineage commitment, as  
656 observed in the mouse<sup>30,32</sup>.

657 Pluripotency is a specific functional definition that was initially coined to describe the  
658 capacity of mammalian cells to differentiate in response to experimental manipulation and  
659 evolved to become a developmental concept describing the state or the potential of early  
660 embryonic progenitors, as compared to immortal cell lines derived from early mammalian  
661 embryos. While underlying gene regulatory networks, or more specifically, pluripotency  
662 networks, have been extensively analysed in eutherian mammals, attempts to extend this notion  
663 to species outside mammals have been plagued by ambiguous sequence comparisons or non-  
664 conservation of functional activities. Despite the fundamental importance of preserving potency  
665 in early development, the extent to which key regulators of the pluripotency network have  
666 shifted during evolution has been surprising. By exploring the functional evolution of one of  
667 the fundamental regulators in the pluripotency network, we have traced the origins of an OCT4-  
668 centric network to the emergence of gnathostomes and showed that its evolution is intimately  
669 linked to the strategy used to preserve the germ line from extrinsic differentiation signals. Our  
670 work sheds light on the evolutionary forces, which drive the extensive diversification of  
671 pluripotency networks across gnathostomes, including developmental contexts, the mode of  
672 germ line specification and variations in early embryonic architecture. In conclusion, we present  
673 a highly nuanced story describing the evolution of POU5 family and suggest that phenotypic  
674 studies restricted to a single model organism can only provide a snapshot of the pluripotency  
675 network linked to this pivotal component.

## 676 **Methods**

### 677 **Plasmid construction**

678 Expression plasmids carrying *Pou5* coding sequence (CDS) were generated for ZHBTc4 ESC  
679 rescue experiment by inserting the triple flag-tagged (3xflag) *Pou5* coding sequences into  
680 pCAGIP vector<sup>43,67</sup> between the CAG promoter and the *IRES-PAC* (Puromycin resistant gene  
681 encoding puromycin N-acetyl-transferase). The sources of *Pou5* genes used for the rescue assay  
682 are listed in Supplementary Table 1. *Pou5* CDS for *CpP1*, *CpP3*, *EbP5*, *LcP1*, *LcP3*, *LeP1*,  
683 *LeP3*, *MeP1*, *MeP3*, *RtP1*, *RtP3*, *ScP3* and chimeric constructs *S313*, *EbP5<sup>LH2</sup>* and *EbP5<sup>S4LH2</sup>*  
684 were synthesised by gBlock (IDT) and Gene synthesis (Invitrogen) services. *XhoI/NotI* sites  
685 were used to insert *Pou5* fragments into the pCAG 3xflag mOct4 vector in replace of the mouse  
686 *Oct4* CDS. For *LcP1*, *AmP1*, *AmP3* with *XhoI* sites present in the CDS, GeneArt® Seamless  
687 Cloning & Assembly (Invitrogen) was used to subclone the *Pou5* CDS into pUCL19 carrying  
688 a 3xflag sequence. The 3xflag *Pou5* CDS were then inserted by transfer a *XbaI/NotI* fragment  
689 into the same sites in the pCAG vector. DNA sequencing was performed by GATC Biotech.

690

### 691 **Mouse ESC culture**

692 Mouse ESCs were routinely cultured as described by ref<sup>38</sup>. Briefly, complete mouse ESC  
693 medium was composed of Glasgow Minimum Essential Medium (GMEM) containing 0.1 mM  
694 non-essential amino acids, 2 mM L-glutamine, 1.0 mM sodium pyruvate, 0.1 mM  $\beta$  –  
695 mercaptoethanol, 10% Fetal Bovine Serum (FBS) and murine LIF (homemade). The  
696 flasks/dishes (Corning) for ESC culture were coated with 0.1% gelatin in PBS. 2iL, Rosette and  
697 EpiLC culture conditions were described in Supplementary Table 3.

698

### 699 **ZHBTc4 ESC rescue experiment**

700 pCAGIP-POU5 expression vectors were linearised with *ScaI* or *PvuI*. ZHBTc4 ESCs ( $1 \times 10^7$ )  
701 were electroporated with 100  $\mu$ g of linearised pCAG-IP-POU5 plasmid (Gene Pulser Xcell™  
702 Electroporation Systems at 0.8 kV, 10  $\mu$ F, 0.4 mm cuvette). Electroporated cells ( $1 \times 10^6$ ) were  
703 then plated onto gelatinised 100 mm culture dishes containing ESC medium with and without  
704 tetracycline (Tc, 2  $\mu$ g/mL). At day 2 post electroporation, the medium was replaced with ESC  
705 medium supplemented with 1  $\mu$ g/mL puromycin (with and without Tc) to select the cells  
706 expressing transfected *POU5* genes and the medium was changed every other day thereafter.  
707 At day 9 post electroporation, several ESC colonies were big enough to be picked for expansion  
708 and used to generate stable ESC lines from both plus and minus Oct4 conditions (without and

709 with Tc). The ESC colonies were also fixed and stained for alkaline phosphatase activity. To  
710 better elucidate the phenotypes of stable POU5 rescued lines, three clonal cell lines were  
711 characterised at passage 6, for each POU5-rescue experiment.

712

### 713 **IPSC generation**

714 To produce retrovirus particle for infecting Nanog-GFP MEF cells, packaging cell lines Plat-E  
715 were transiently transfected using Lipofectamine LTX (Invitrogen) with two expression  
716 vectors: pMXs-vector carrying gene of interest and pCL-ECO containing modified gene  
717 encoding retroviral components. Retrovirus supernatant or medium containing virus particles  
718 was harvested at day 2 post transfection and concentrated by Retro-Concentrator (Clontech)  
719 solution. The titer of retrovirus was measure by Retro-X qRT-PCR Titration Kit (Clontech).  
720 For iPSC generation, transgenic mouse embryos at embryonic stage 13.5 were collected for  
721 MEF derivation. The embryos were from the cross of male Nanog-eGFP mice (Ian Chambers,  
722 University of Edinburgh) with female 129S2/ScPasCrl (Charles Reiver) Nanog-eGFP/129. For  
723 ethical approval, the mice were maintained, bred, and manipulated at University of  
724 Copenhagen, SUND transgenic core facility (animal work was authorized by project licenses  
725 2012-15-2934-00142, 2013-15-2934-00935 and 2018-15-0201-01520, Danish National  
726 Animal Experiments Inspectorate (Dyreforsøgstilsynet)). For iPSC induction, Nanog-GFP  
727 MEF cells were infected with ectopic retrovirus carrying Oct4 or POU5 homologue gene (X25  
728 or X91) together with other retrovirus carrying Sox2, Klf4 and c-Myc. The infection was done  
729 at day 0 and day 1 under MEF medium. On day 3, MEF medium was replaced with defined  
730 iPSC induction medium. On day 4, induced cells were seeded onto irradiated feeders. Medium  
731 was changed daily from day 6 to day 10 and every two-day from day 12 onward. Infected cells  
732 and iPSCs were cultured on the irradiated feeders and in defined iPSC induction medium  
733 composed of DMEM high glucose (ThermoFisher), 20% KnockOut Serum Replacement  
734 (ThermoFisher), 0.1 mM non-essential amino acids (Sigma), 2 mM L-glutamine  
735 (ThermoFisher), 0.1 mM  $\beta$ -mercaptoethanol (Sigma), LIF (homemade), 20  $\mu$ g/mL Vitamin C  
736 (L-ascorbic acid, Sigma), 0.5  $\mu$ M Alk5 inhibitor (A83-01, Tocris).

737

### 738 **Alkaline phosphatase (AP) staining**

739 The Leukocyte Alkaline phosphatase kit was used for AP staining according to the  
740 manufacturer's instructions. Briefly, cells were fixed with a fresh mixture of 25 mL citrate  
741 solution, 8 mL 37% formaldehyde and 65 mL acetone. The fixed cells were then washed twice  
742 with tap water and stained with fresh AP solution, which was generated by mixing 400  $\mu$ L of



743 FRV alkaline phosphatase solution and 400  $\mu$ L of sodium nitrate solution and incubating the  
744 mixture in the dark for 2 minutes. Subsequently, the mixture was added to 18 mL of water and  
745 mixed well, followed by addition of 400  $\mu$ L of naphthol. A volume of 5 mL of this mixture was  
746 immediately added to the fixed cells, followed by a 25 minutes incubation in the dark at room  
747 temperature. The stained cells were washed twice with tap water and air dried overnight. Images  
748 of AP colonies were acquired using a Leica-5500B microscope and then processed using Fiji  
749 ImageJ image processing software. The stained colonies were categorised into 3 classes,  
750 undifferentiated, mixed and differentiated, based on the intensity of AP staining. The rescue  
751 index was calculated by dividing (1) the number of rescued AP positive ESC colonies obtained  
752 in the absence of endogenous Oct4 with (2) the number of colonies obtained in the presence of  
753 endogenous Oct4 for a given transfection.

754

### 755 **Immunofluorescence**

756 POU5-rescued ESCs at passage 6 were seeded onto 8-well 15 $\mu$ -Slide (Ibidi) at a density 20,000  
757 cells/well. The cells were grown for two days and then fixed with 4% paraformaldehyde (PFA).  
758 The list of antibodies and details of their application is provided in Supplementary Table 3.  
759 Primary antibodies were diluted in blocking solution (containing TritonX 100, serum and BSA)  
760 and used to stain cells overnight at 4° C. Cells were then stained with secondary antibodies  
761 diluted 1:800 in blocking solution for 1 hour at room temperature in the dark. Cells were washed  
762 three times with PBS after each antibody incubation. Samples were imaged on a Leica AP6000  
763 microscope and within each experiment, all images were acquired using identical acquisition  
764 settings and analysed by Fiji<sup>68</sup>. E-cadherin (CDH1) and p120 catenin (CTNND1) was chosen  
765 as membrane-associated marker to observe cell morphology. KLF4, CDX2 and GATA6 are  
766 markers for undifferentiated naïve ESCs, trophoctodermal lineage and PrE, respectively.  
767 Immunofluorescence quantification was performed using CellProfiler<sup>69</sup>. Briefly, fluorescent  
768 images for KLF4, GATA6, CDX2 or DAPI staining of POU5-rescued cells were uploaded and  
769 run on CellProfiler software using a revised pipeline (Supplementary Information 2). The  
770 output showing the number of accepted objects indicates the number of cells with specific  
771 signals. Number of KLF4, GATA6 or CDX2 positive cells against DAPI positive cells (total  
772 cells in fluorescent image) were calculated as a percentage to compare between different POU5-  
773 rescued lines. Data points in the bar charts are the percentage of each biological clone.

774



## 775 **Western Blots**

776 Cells were washed once with PBS and then lysed directly on the plate by addition of 2x  
777 Laemmli buffer (4% (w/v) SDS, 20% (v/v) glycerol, 120 mM Tris-HCl pH 7.4). Samples were  
778 heated for 5 min at 70° C, sonicated for 10 secs at 40% power using a Sonopuls mini20  
779 (Bandelin) and centrifuged for 10 mins at 14,000 x g to clear the lysates. Protein concentration  
780 was determined using NanoDrop 2000 (Thermo Scientific). A sample volume of 20 µl  
781 containing 40 µg of protein, supplemented with 2 µl of 1 M DTT and 1 µl of bromophenol blue,  
782 was loaded per lane on NuPAGE 4–12% Bis-Tris Protein Gels (Invitrogen). Electrophoresis  
783 was performed in 1x NuPAGE MES SDS running buffer (Invitrogen) at 190 V for 45 min.  
784 Proteins were transferred to Nitrocellulose blotting membranes (GE Healthcare) at 400 mA for  
785 70 min on ice in cold transfer buffer (25 mM Tris base, 190 mM Glycine, 20% Methanol). After  
786 washing in TBST (20 mM Tris (pH 7.5), 150 mM NaCl, 0.1% Tween 20), membranes were  
787 blocked for >1 hr at RT in TBST containing 10% Skim milk powder. All primary antibody  
788 incubations (overnight at 4 °C) were performed in TBST containing 5% BSA, followed by three  
789 washes in TBST and secondary antibody incubations (2hrs at RT) were performed in TBST  
790 containing 5% Skim milk powder. Blots were imaged on a Chemidoc MP (Biorad), and then  
791 quantified using ImageJ.

792

## 793 **Quantitative RT-PCR (qRT-PCR)**

794 RNA and cDNA preparations were performed using the RNeasy™ Mini Kit and SuperScript®  
795 III Reverse Transcriptase, respectively, according to manufacturer's instructions. Quantitative  
796 RT-PCR was performed using the Roche Universal ProbeLibrary (UPL) System and UPL  
797 primers were designed using the Roche Assay Design Centre. All UPL primers and probes used  
798 in this study are listed in Supplementary Table 3. PCR reactions were performed using the  
799 LightCycler® 480 Probes Master Mix. Briefly, a 10 µl reaction of UPL qRT-PCR was  
800 composed of 5 µL of Probes Master Mix, 0.45 µL of 10 µM forward/left primer, 0.45 µL of 10  
801 µM reverse/right primer, 0.1 µL of specific probe, 2 µL of diluted first strand cDNA, and 2 µL  
802 of RNase-free water. Concentration value for each gene of interest were normalised to that of  
803 the housekeeping gene *Tbp* to obtain the relative transcript level.

804

## 805 **Microarray Processing and Analysis**

806 Global gene expression profiles of POU5-rescued ESC lines were obtained using Agilent one-  
807 colour microarray-based gene expression analysis according to the manufacturer's instructions.  
808 High quality total RNA (RNA integrity number = 10) was labelled with Cyanine 3 CTP using

809 the Low Input Quick Amp Labelling Kit (Agilent Technologies- 5190-2305), and purified using  
810 Qiagen's RNeasy Mini Spin Columns. The quantity of purified Cy3 labelled cRNA was  
811 measured using a Nanodrop spectrophotometer. Fragmentation was performed on 600 ng of  
812 cRNA from each sample and the fragmented cRNA was then hybridised to Agilent Mouse  
813 8X60K slides (Grid\_GenomicBuild, mm9, NCBI37, Jul2007) for 17 hours at 65 °C. Hybridised  
814 slides were then washed with Agilent wash buffers and scanned on an Agilent Scanner (Agilent  
815 Technologies, G2600D SG12524268), and probe intensities were obtained by taking the  
816 gProcessedSignal from the output of Agilent feature extraction software using default settings.  
817 Probe annotation and statistical testing was performed using the NIA Array Analysis Tool as  
818 described in ref<sup>70</sup>. Significant genes were clustered and heatmap analysis was performed using  
819 Morpheus (<https://software.broadinstitute.org/morpheus>). Gene lists in each cluster were  
820 analysed for enriched Gene annotation (GO)-term for Biological Process and Cellular  
821 Components using ShinyGO v0.66<sup>71</sup> to generate lists of functional enrichment.

822

### 823 **Flow cytometry**

824 ESCs were collected and stained with the indicated primary antibody dilutions (Supplementary  
825 Table 3) in FACS buffer (10% FBS in PBS) for 15 minutes on ice. The cells were washed three  
826 times with FACS buffer and re-suspended in cold FACS buffer containing DAPI (1 µg/mL). If  
827 secondary antibodies were required, the cells were further stained with a dilution 1:800 of  
828 secondary antibodies for 15 minutes on ice, washed three times with PBS and re-suspended in  
829 cold FACS buffer containing DAPI. All experiments included unstained E14Tg2A ESCs as a  
830 non-fluorescent control that was used to establish appropriate gates. Flow cytometry was  
831 carried out on a BD LSRFortessa (BD Bioscience) and data analysis was performed in FCS  
832 Express (De Novo Software).

833

### 834 ***In situ* hybridisation**

835 Whole-mount *in situ* hybridisations (ISH) and sections of catshark embryos were conducted  
836 using standard protocols, as described in ref<sup>72</sup>. Catshark breeders were purchased from local  
837 professional fishermen and maintained by the Oceanological Observatory Aquariology Service  
838 of Banyuls sur Mer (France) with aquatic infrastructure based on national regulations (license  
839 number A6601601).

840

## 841 **Structural model prediction by AlphaFold2**

842 Protein sequences of POU5 homologues used for AlphaFold2 structural prediction<sup>48</sup> are listed  
843 in Supplementary Information 3. We performed AlphaFold2 with Colab notebook (Link is  
844 noted in Supplementary Table 3). We obtained 3D coordinates, per-residue confidence metric  
845 called pLDDT and Predicted Aligned Error from each POU5 structure (shown in  
846 Supplementary Information 3). From AlphaFold2 output, non-structural regions including N-  
847 /C-terminal domains and a region between  $\alpha 1'$ -helix of the linker and  $\alpha 1$  helix of POU-HD  
848 were removed by PyMol<sup>73</sup> to obtain isolated POU-S-Linker (POU-S-L) and isolated POU-HD.  
849 In PyMol, isolated domains were also superimposed to each corresponding domain in mOct4  
850 on *PORE* sequence (PDB: 3L1P<sup>49</sup>). Isolated domains of POU5 protein and *PORE* sequence  
851 were saved to obtain new structural model on *PORE* DNA (POU5-*PORE* structure). This  
852 combined POU5-*PORE* structures were verified for the clash score (steric clashes) by Phenix<sup>74</sup>  
853 using MolProbity<sup>75</sup> (Supplementary Information 3-Table 3). The structures with low clash score  
854 (<10) were further analysed for H-bonding interaction to *PORE* DNA using ChimeraX<sup>76</sup> H-  
855 bonding prediction parameters included distance tolerance at 0.750Å and angle tolerance at  
856 20.000°.

## 857 **Acknowledgements**

859 We thank Gillian Morrison for POU5 plasmids, Yasunori Murakami and Chris Amemiya for  
860 assisting with preliminary cyclostome *POU5* analysis, Charlotte Bouleau and Charline Jamin  
861 for technical help in *ScPou5fl* ISH, William Hamilton for critical comments and revision, Gelo  
862 Victoriano Dela Cruz for flow cytometry technical assistance. We appreciate the contribution  
863 of python *Pou5fl* mRNA sequence from Moises Mallo. We also thank the Oceanological  
864 Observatory Aquariology Service of Banyuls sur Mer for care of catsharks and EMBRC-France  
865 for the support of marine infrastructure. This work was supported by University of Copenhagen  
866 studentship (to W.S.), Lundbeck Foundation Grant (to J.M.B, R198-2015-412), région  
867 Bretagne doctoral fellowship (to B.G.) and AsymBrain ANR grant (to S.M., ANR-16-CE13-  
868 0013-02). Work in the NNF Center for Stem Cell Medicine is funded by the Novo Nordisk  
869 Foundation (NNF17CC0027852 and NNF21CC0073729).

## 870 **Accession Numbers**

872 The Gene Expression Omnibus (GEO) accession number for the DNA microarray data reported  
873 in this study is GSE148167 (LcP1/LcP3/mOct4 rescued ESCs).

874

875 **Author contributions**

876 W.S., E.M., M.L., S.M. and J.M.B. designed the study. S.F. obtained tammar wallaby, turtle,  
877 coelacanth POU5F1 and POU5F3 coding sequences. S.M. and H.M. obtained hagfish and  
878 chondrichthyan POU5 sequences, generated phylogenetic trees and evolutionary rate analyses  
879 of POU5. Oct4 null ESC rescue assay and the generation of clonal cell lines was conducted by  
880 W.S (for coelacanth, turtle, axolotl, tammar wallaby POU5), E.M. (for catshark, whale shark,  
881 little skate and hagfish POU5), H.P. and F.R. (for catshark and chimeric coelacanth-catshark  
882 POU5), A.L. (for *Xenopus* XIPOU25 (XIPOU5F3.2) and XIPOU91 (XIPOU5F3.1)), and F.H.  
883 (for *Xenopus* POU5 chimeric proteins). W.S. and E.M. performed analysis of POU5 rescued  
884 clonal lines by immunofluorescence, qRT-PCR and microarray. J.H. analysed the microarray  
885 dataset. M.W., G.M. and W.S. performed AlphaFold2 structural modelling prediction and  
886 interpreted the results. B.G. conducted *in situ* hybridizations in catshark embryos. F.S. and S.K.  
887 provided the arctic lamprey unpublished transcriptome database, lamprey embryos for POU5  
888 sequence analysis and assisted with lamprey POU5 protein sequence analysis. W.S., M.L.,  
889 E.M., S.M. and J.M.B. interpreted the results. W.S., E.M., M.L. S.M. and J.M.B. wrote the  
890 paper with input from all authors.

891

892 **Declaration of Interests**

893 The authors declare no competing interests.

## 894 **References**

- 895 1. Morgani, S., Nichols, J. & Hadjantonakis, A.-K. The many faces of Pluripotency: in vitro  
896 adaptations of a continuum of in vivo states. *BMC Dev. Biol.* **17**, 7 (2017).
- 897 2. Brons, I. G. M. *et al.* Derivation of pluripotent epiblast stem cells from mammalian embryos.  
898 *Nature* **448**, 191–195 (2007).
- 899 3. Tesar, P. J. *et al.* New cell lines from mouse epiblast share defining features with human  
900 embryonic stem cells. *Nature* **448**, 196–199 (2007).
- 901 4. Bell, E. *et al.* Dynamic CpG methylation delineates subregions within super-enhancers  
902 selectively decommissioned at the exit from naive pluripotency. *Nat. Commun.* **11**, 1112  
903 (2020).
- 904 5. Buecker, C. *et al.* Reorganization of enhancer patterns in transition from naive to primed  
905 pluripotency. *Cell Stem Cell* **14**, 838–853 (2014).
- 906 6. Factor, D. C. *et al.* Epigenomic comparison reveals activation of ‘seed’ enhancers during  
907 transition from naive to primed pluripotency. *Cell Stem Cell* **14**, 854–863 (2014).
- 908 7. Festuccia, N. *et al.* Esrrb extinction triggers dismantling of naïve pluripotency and marks  
909 commitment to differentiation. *EMBO J.* **37**, (2018).
- 910 8. Li, M. & Izpisua Belmonte, J. C. Deconstructing the pluripotency gene regulatory network.  
911 *Nat. Cell Biol.* **20**, 382–392 (2018).
- 912 9. Mzoughi, S. *et al.* PRDM15 safeguards naive pluripotency by transcriptionally regulating  
913 WNT and. *Nat. Genet.* **49**, 1354–1363 (2017).
- 914 10. Okashita, N. *et al.* PRDM14 drives OCT3/4 recruitment via active demethylation in the  
915 transition from primed to naive pluripotency. *Stem Cell Rep.* **7**, 1072–1086 (2016).
- 916 11. Respuela, P. *et al.* Foxd3 promotes exit from naive pluripotency through enhancer  
917 decommissioning and inhibits germline specification. *Cell Stem Cell* **18**, 118–133 (2016).
- 918 12. Yamaji, M. *et al.* PRDM14 ensures naive pluripotency through dual regulation of signaling  
919 and epigenetic pathways in mouse embryonic stem cells. *Cell Stem Cell* **12**, 368–382 (2013).
- 920 13. Neagu, A. *et al.* In vitro capture and characterization of embryonic rosette-stage  
921 pluripotency between naive and primed states. *Nat. Cell Biol.* **22**, 534–545 (2020).
- 922 14. Shahbazi, M. N. *et al.* Pluripotent state transitions coordinate morphogenesis in mouse and  
923 human embryos. *Nature* **552**, 239–243 (2017).
- 924 15. Debowski, K. *et al.* The transcriptomes of novel marmoset monkey embryonic stem cell  
925 lines reflect distinct genomic features. *Sci. Rep.* **6**, 29122 (2016).

- 926 16. Gafni, O. *et al.* Derivation of novel human ground state naive pluripotent stem cells. *Nature*  
927 **504**, 282–286 (2013).
- 928 17. Guo, G. *et al.* Naive pluripotent stem cells derived directly from isolated cells of the human  
929 inner cell mass. *Stem Cell Rep.* **6**, 437–446 (2016).
- 930 18. Ware, C. B. *et al.* Derivation of naive human embryonic stem cells. *Proc. Natl. Acad. Sci.*  
931 *U. S. A.* **111**, 4484–4489 (2014).
- 932 19. Takashima, Y. *et al.* Resetting transcription factor control circuitry toward ground-state  
933 pluripotency in human. *Cell* **158**, 1254–1269 (2014).
- 934 20. Theunissen, T. W. *et al.* Systematic identification of culture conditions for induction and  
935 maintenance of naive human pluripotency. *Cell Stem Cell* **15**, 471–487 (2014).
- 936 21. Weeratunga, P., Shahsavari, A., Ovchinnikov, D. A., Wolvetang, E. J. & Whitworth, D. J.  
937 Induced pluripotent stem cells from a marsupial, the tasmanian devil (*Sarcophilus harrisii*):  
938 insight into the evolution of mammalian pluripotency. *Stem Cells Dev.* **27**, 112–122 (2018).
- 939 22. Whitworth, D. J. *et al.* Platypus induced pluripotent stem cells: the unique pluripotency  
940 signature of a monotreme. *Stem Cells Dev.* **28**, 151–164 (2019).
- 941 23. Mak, S.-S. *et al.* Characterization of the finch embryo supports evolutionary conservation  
942 of the naive stage of development in amniotes. *eLife* **4**, e07178 (2015).
- 943 24. Frankenberg, S. & Renfree, M. B. On the origin of POU5F1. *BMC Biol.* **11**, 56 (2013).
- 944 25. Frankenberg, S. R. *et al.* The POU-er of gene nomenclature. *Development* **141**, 2921 (2014).
- 945 26. Mulas, C. *et al.* Oct4 regulates the embryonic axis and coordinates exit from pluripotency  
946 and germ layer specification in the mouse embryo. *Dev. Camb. Engl.* **145**, dev159103 (2018).
- 947 27. Niwa, H., Miyazaki, J. & Smith, A. G. Quantitative expression of Oct-3/4 defines  
948 differentiation, dedifferentiation or self-renewal of ES cells. *Nat. Genet.* **24**, 372–376 (2000).
- 949 28. Osorno, R. *et al.* The developmental dismantling of pluripotency is reversed by ectopic Oct4  
950 expression. *Dev. Camb. Engl.* **139**, 2288–2298 (2012).
- 951 29. Radzishheuskaya, A. *et al.* A defined Oct4 level governs cell state transitions of pluripotency  
952 entry and differentiation into all embryonic lineages. *Nat. Cell Biol.* **15**, 579–590 (2013).
- 953 30. Frum, T. *et al.* Oct4 cell-autonomously promotes primitive endoderm development in the  
954 mouse blastocyst. *Dev. Cell* **25**, 610–622 (2013).
- 955 31. Le Bin, G. C. *et al.* Oct4 is required for lineage priming in the developing inner cell mass  
956 of the mouse blastocyst. *Dev. Camb. Engl.* **141**, 1001–1010 (2014).
- 957 32. Nichols, J. *et al.* Formation of pluripotent stem cells in the mammalian embryo depends on  
958 the POU transcription factor Oct4. *Cell* **95**, 379–391 (1998).



- 959 33. DeVeale, B. *et al.* Oct4 is required ~E7.5 for proliferation in the primitive streak. *PLoS*  
960 *Genet.* **9**, e1003957–e1003957 (2013).
- 961 34. Kehler, J. *et al.* Oct4 is required for primordial germ cell survival. *EMBO Rep.* **5**, 1078–  
962 1083 (2004).
- 963 35. Livigni, A. *et al.* A conserved Oct4/POUV-dependent network links adhesion and migration  
964 to progenitor maintenance. *Curr. Biol. CB* **23**, 2233–2244 (2013).
- 965 36. Lavial, F. *et al.* The Oct4 homologue PouV and Nanog regulate pluripotency in chicken  
966 embryonic stem cells. *Dev. Camb. Engl.* **134**, 3549–3563 (2007).
- 967 37. Liu, R. *et al.* Medaka Oct4 is essential for pluripotency in blastula formation and ES cell  
968 derivation. *Stem Cell Rev. Rep.* **11**, 11–23 (2015).
- 969 38. Morrison, G. M. & Brickman, J. M. Conserved roles for Oct4 homologues in maintaining  
970 multipotency during early vertebrate development. *Dev. Camb. Engl.* **133**, 2011–2022 (2006).
- 971 39. Reim, G. & Brand, M. Maternal control of vertebrate dorsoventral axis formation and  
972 epiboly by the POU domain protein Spg/Pou2/Oct4. *Development* **133**, 2757 (2006).
- 973 40. Sun, B., Gui, L., Liu, R., Hong, Y. & Li, M. Medaka oct4 is essential for gastrulation, central  
974 nervous system development and angiogenesis. *Gene* **733**, 144270 (2020).
- 975 41. Tapia, N. *et al.* Reprogramming to pluripotency is an ancient trait of vertebrate Oct4 and  
976 Pou2 proteins. *Nat. Commun.* **3**, 1279 (2012).
- 977 42. Lachnit, M., Kur, E. & Driever, W. Alterations of the cytoskeleton in all three embryonic  
978 lineages contribute to the epiboly defect of Pou5f1/Oct4 deficient MZspg zebrafish embryos.  
979 *Dev. Biol.* **315**, 1–17 (2008).
- 980 43. Niwa, H., Masui, S., Chambers, I., Smith, A. G. & Miyazaki, J. Phenotypic  
981 complementation establishes requirements for specific POU domain and generic transactivation  
982 function of Oct-3/4 in embryonic stem cells. *Mol. Cell. Biol.* **22**, 1526–1536 (2002).
- 983 44. Gold, D. A., Gates, R. D. & Jacobs, D. K. The early expansion and evolutionary dynamics  
984 of POU class genes. *Mol. Biol. Evol.* **31**, 3136–3147 (2014).
- 985 45. Jaillon, O. *et al.* Genome duplication in the teleost fish *Tetraodon nigroviridis* reveals the  
986 early vertebrate proto-karyotype. *Nature* **431**, 946–957 (2004).
- 987 46. Venkatarama, T. *et al.* Repression of zygotic gene expression in the *Xenopus* germline.  
988 *Dev. Camb. Engl.* **137**, 651–660 (2010).
- 989 47. Hayashi, K., Ohta, H., Kurimoto, K., Aramaki, S. & Saitou, M. Reconstitution of the mouse  
990 germ cell specification pathway in culture by pluripotent stem cells. *Cell* **146**, 519–532 (2011).
- 991 48. Jumper, J. *et al.* Highly accurate protein structure prediction with AlphaFold. *Nature* **596**,  
992 583–589 (2021).



- 993 49. Esch, D. *et al.* A unique Oct4 interface is crucial for reprogramming to pluripotency. *Nat.*  
994 *Cell Biol.* **15**, 295–301 (2013).
- 995 50. Jin, W. *et al.* Critical POU domain residues confer Oct4 uniqueness in somatic cell  
996 reprogramming. *Scientific Reports* **6**, 20818 (2016).
- 997 51. Nishimoto, M. *et al.* Oct-3/4 maintains the proliferative embryonic stem cell state via  
998 specific binding to a variant octamer sequence in the regulatory region of the UTF1 locus. *Mol*  
999 *Cell Biol* **25**, 5084–5094 (2005).
- 1000 52. Reményi, A. *et al.* Crystal structure of a POU/HMG/DNA ternary complex suggests  
1001 differential assembly of Oct4 and Sox2 on two enhancers. *Genes Dev* **17**, 2048–2059 (2003).
- 1002 53. Jerabek, S. *et al.* Changing POU dimerization preferences converts Oct6 into a pluripotency  
1003 inducer. *EMBO reports* **18**, 319–333 (2017).
- 1004 54. Dong *et al.* A balanced Oct4 interactome is crucial for maintaining pluripotency. *Science*  
1005 *Advances* **8**, eabe4375 (2022).
- 1006 55. Heimberg, A. M., Cowper-Sal-lari, R., Semon, M., Donoghue, P. C. J. & Peterson, K. J.  
1007 microRNAs reveal the interrelationships of hagfish, lampreys, and gnathostomes and the nature  
1008 of the ancestral vertebrate. *Proc. Natl. Acad. Sci. U. S. A.* **107**, 19379–19383 (2010).
- 1009 56. Dehal, P. & Boore, J. L. Two rounds of whole genome duplication in the ancestral  
1010 vertebrate. *PLOS Biol.* **3**, e314 (2005).
- 1011 57. Putnam, N. H. *et al.* The amphioxus genome and the evolution of the chordate karyotype.  
1012 *Nature* **453**, 1064–1071 (2008).
- 1013 58. Simakov, O. *et al.* Deeply conserved synteny resolves early events in vertebrate evolution.  
1014 *Nat. Ecol. Evol.* **4**, 820–830 (2020).
- 1015 59. Conant, G. C. & Wolfe, K. H. Turning a hobby into a job: how duplicated genes find new  
1016 functions. *Nat. Rev. Genet.* **9**, 938–950 (2008).
- 1017 60. Belting, H. G. *et al.* spiel ohne grenzen/pou2 is required during establishment of the  
1018 zebrafish midbrain-hindbrain boundary organizer. *Dev. Camb. Engl.* **128**, 4165–4176 (2001).
- 1019 61. Burgess, S., Reim, G., Chen, W., Hopkins, N. & Brand, M. The zebrafish spiel-ohne-  
1020 grenzen (spg) gene encodes the POU domain protein Pou2 related to mammalian Oct4 and is  
1021 essential for formation of the midbrain and hindbrain, and for pre-gastrula morphogenesis.  
1022 *Development* **129**, 905 (2002).
- 1023 62. Palmieri, S. L., Peter, W., Hess, H. & Scholer, H. R. Oct-4 transcription factor is  
1024 differentially expressed in the mouse embryo during establishment of the first two  
1025 extraembryonic cell lineages involved in implantation. *Dev. Biol.* **166**, 259–267 (1994).

- 1026 63. Extavour, C. G. & Akam, M. Mechanisms of germ cell specification across the metazoans:  
1027 epigenesis and preformation. *Dev. Camb. Engl.* **130**, 5869–5884 (2003).
- 1028 64. Bertocchini, F. & Chuva de Sousa Lopes, S. M. Germline development in amniotes: A  
1029 paradigm shift in primordial germ cell specification. *BioEssays News Rev. Mol. Cell. Dev. Biol.*  
1030 **38**, 791–800 (2016).
- 1031 65. Bachvarova, R. F. *et al.* Expression of Dazl and Vasa in turtle embryos and ovaries:  
1032 evidence for inductive specification of germ cells. *Evol. Dev.* **11**, 525–534 (2009).
- 1033 66. Bachvarova, R. F., Crother, B. I. & Johnson, A. D. Evolution of germ cell development in  
1034 tetrapods: comparison of urodeles and amniotes. *Evol. Dev.* **11**, 603–609 (2009).
- 1035 67. Niwa, H., Yamamura, K. & Miyazaki, J. Efficient selection for high-expression  
1036 transfectants with a novel eukaryotic vector. *Gene* **108**, 193–199 (1991).
- 1037 68. Schindelin, J. *et al.* Fiji: an open-source platform for biological-image analysis. *Nat.*  
1038 *Methods* **9**, 676–682 (2012).
- 1039 69. Stirling, D. R., Carpenter, A. E. & Cimini, B. A. CellProfiler Analyst 3.0: accessible data  
1040 exploration and machine learning for image analysis. *Bioinformatics* **37**, 3992–3994 (2021).
- 1041 70. Sharov, A. A., Dudekula, D. B. & Ko, M. S. H. A web-based tool for principal component  
1042 and significance analysis of microarray data. *Bioinforma. Oxf. Engl.* **21**, 2548–2549 (2005).
- 1043 71. Ge, S. X., Jung, D. & Yao, R. ShinyGO: a graphical gene-set enrichment tool for animals  
1044 and plants. *Bioinformatics* (2019) doi:10.1093/bioinformatics/btz931.
- 1045 72. Coolen, M. *et al.* Evolution of axis specification mechanisms in jawed vertebrates: insights  
1046 from a chondrichthyan. *PLOS ONE* **2**, e374 (2007).
- 1047 73. The PyMOL Molecular Graphics System, Version 2.0 Schrödinger, LLC.
- 1048 74. Liebschner, D. *et al.* Macromolecular structure determination using X-rays, neutrons and  
1049 electrons: recent developments in Phenix. *Acta Crystallogr D Struct Biol* **75**, 861–877 (2019).
- 1050 75. Williams, C. J. *et al.* MolProbity: More and better reference data for improved all-atom  
1051 structure validation. *Protein Sci* **27**, 293–315 (2018).
- 1052 76. Pettersen, E. F. *et al.* UCSF ChimeraX: Structure visualization for researchers, educators,  
1053 and developers. *Protein Sci* **30**, 70–82 (2021).
- 1054 77. Waterhouse, A. M., Procter, J. B., Martin, D. M. A., Clamp, M. & Barton, G. J. Jalview  
1055 Version 2—a multiple sequence alignment editor and analysis workbench. *Bioinformatics* **25**,  
1056 1189–1191 (2009).
- 1057 78. Li, S. *et al.* Disruption of OCT4 Ubiquitination Increases OCT4 Protein Stability and  
1058 ASH2L-B-Mediated H3K4 Methylation Promoting Pluripotency Acquisition. *Stem Cell*  
1059 *Reports* **11**, 973–987 (2018).

- 1060 79. Hornbeck, P. V. *et al.* PhosphoSitePlus, 2014: mutations, PTMs and recalibrations. *Nucleic*  
1061 *Acids Research* **43**, D512–D520 (2015).
- 1062 80. Morpheus, <https://software.broadinstitute.org/morpheus>
- 1063 81. Marra, N. J. *et al.* White shark genome reveals ancient elasmobranch adaptations associated  
1064 with wound healing and the maintenance of genome stability. *Proc. Natl. Acad. Sci.* **116**, 4446  
1065 (2019).
- 1066 82. Hara, Y. *et al.* Shark genomes provide insights into elasmobranch evolution and the origin  
1067 of vertebrates. *Nat. Ecol. Evol.* **2**, 1761–1771 (2018).
- 1068 83. Wang, Q. *et al.* Community annotation and bioinformatics workforce development in  
1069 concert-Little Skate Genome Annotation Workshops and Jamborees. *Database J. Biol.*  
1070 *Databases Curation* 2012, bar064–bar064 (2012).
- 1071 84. Wyffels, J. *et al.* SkateBase, an elasmobranch genome project and collection of molecular  
1072 resources for chondrichthyan fishes. *FI000Research* **3**, 191 (2014).
- 1073 85. Takahashi, K., & Yamanaka, S. Induction of pluripotent stem cells from mouse embryonic  
1074 and adult fibroblast cultures by defined factors. *Cell* **126**, 663–676 (2006)
- 1075 86. Suchard, M. A. *et al.* Bayesian phylogenetic and phylodynamic data integration using  
1076 BEAST 1.10. *Virus Evol.* **4**, (2018).
- 1077 87. Huelsenbeck, J. P. & Ronquist, F. MRBAYES: Bayesian inference of phylogenetic trees.  
1078 *Bioinformatics* **17**, 754–755 (2001).
- 1079 88. Meredith, R. W. *et al.* Impacts of the Cretaceous Terrestrial Revolution and KPg extinction  
1080 on mammal diversification. *Science* **334**, 521–524 (2011).
- 1081 89. Betancur-R, R. *et al.* The tree of life and a new classification of bony fishes. *PLoS Curr.* **5**,  
1082 ecurrents.tol.53ba26640df0ccaee75bb165c8c26288 (2013).
- 1083 90. Godard, B. G. *et al.* Mechanisms of endoderm formation in a cartilaginous fish reveal  
1084 ancestral and homoplastic traits in jawed vertebrates. *Biol. Open* **3**, 1098–1107 (2014).
- 1085

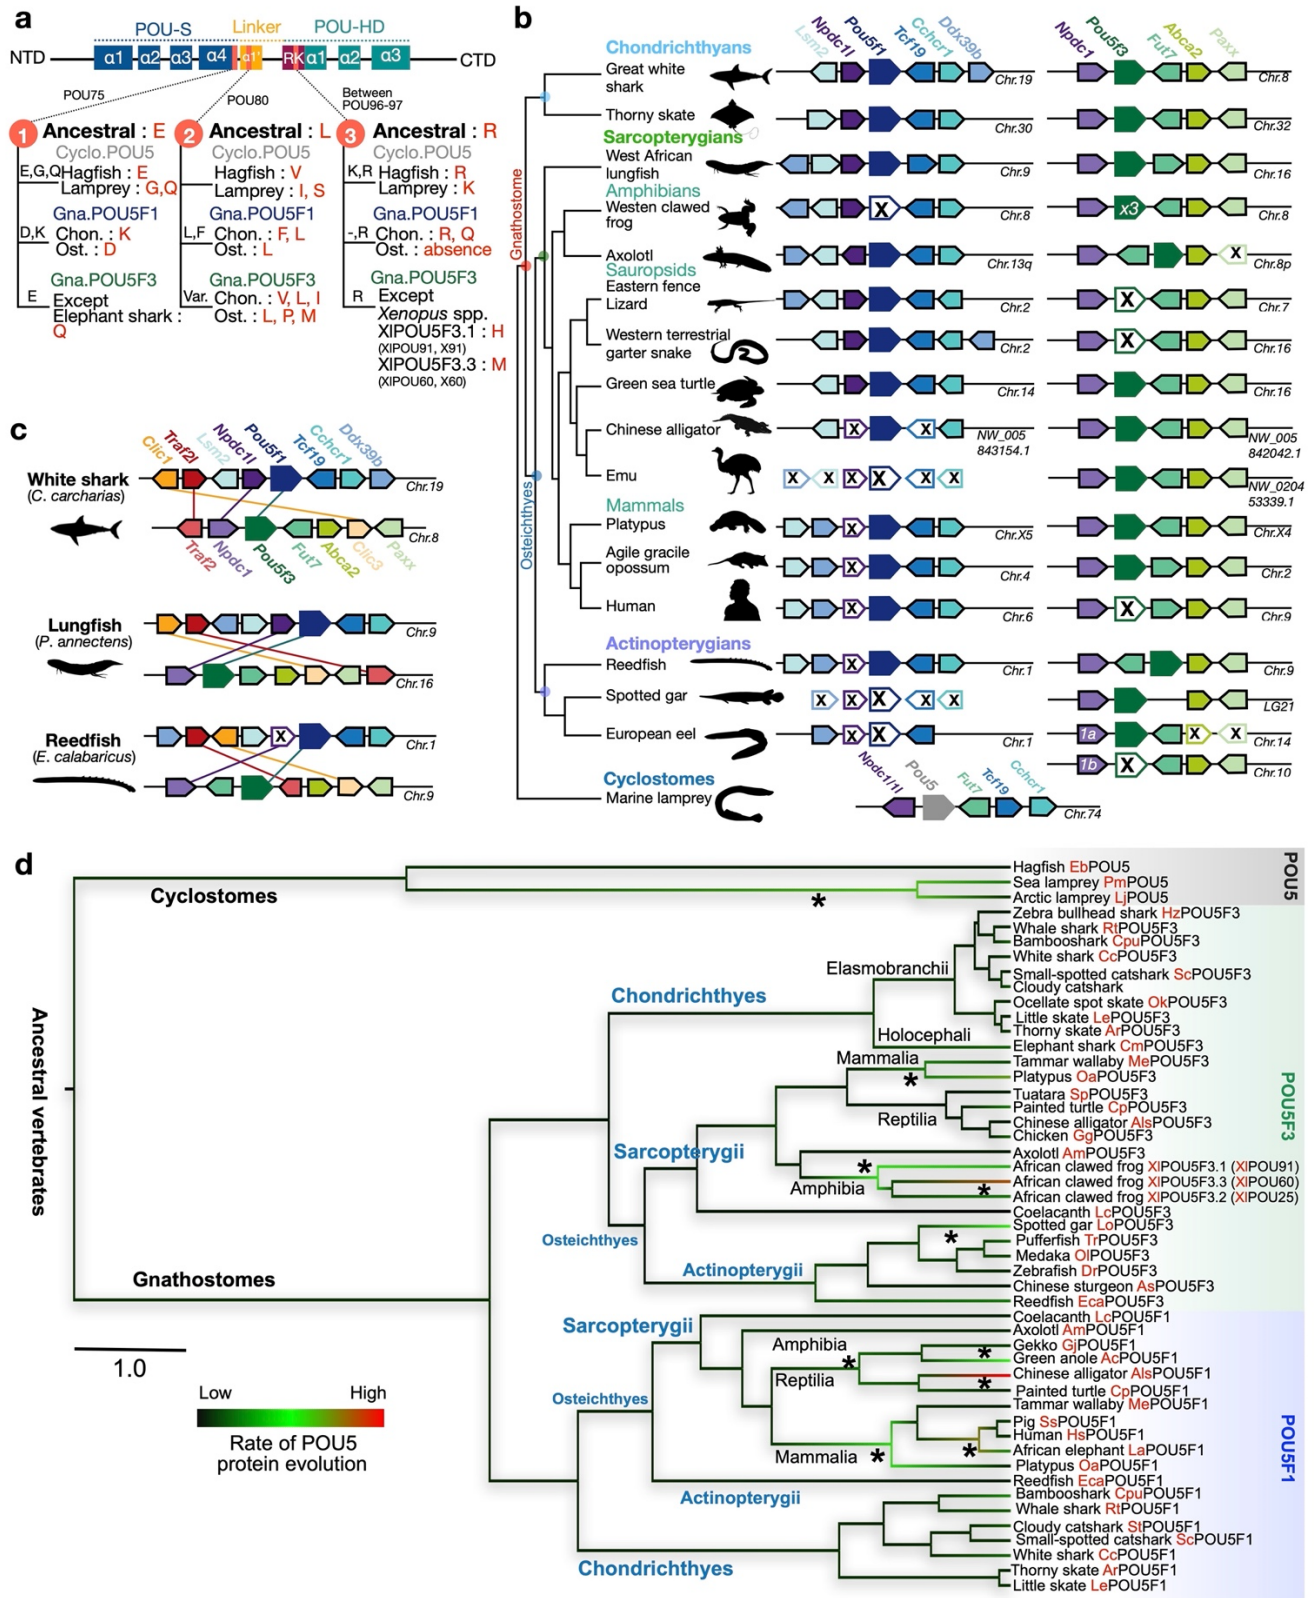

1086

1087



1088 **Fig. 1 Evolution of the POU5 family in vertebrates**

1089 **a**, Differences between gnathostome POU5F1 and POU5F3 proteins in the POU-S-Linker-  
1090 POU-HD. Ancestral residues prior to the duplication generating the gnathostome paralogues  
1091 are shown in bold characters for positions POU75, POU80 and POU96/97 of POU5F1  
1092 (Gna.POU5F1, blue) and POU5F3 (Gna.POU5F3, green). Residues found in cyclostomes  
1093 (Cyclo.POU5, grey) at these positions are also shown. NTD and CTD stand for N-terminal and  
1094 C-terminal domains, respectively. **b**, Synteny conservations in the vicinity of *Pou5* genes across  
1095 vertebrates. *Pou5* genes are depicted by coloured arrows, with a single arrow for the three *X.*  
1096 *laevis Pou5f3* replicates and two arrows representing the combinations of exons found in  
1097 inverted order in hagfish *E. burgeri* (see Results and Supplementary Information 1). Black  
1098 crosses indicate a missing gene in the genomic data analysed. In gnathostomes, genes showing  
1099 conserved synteny with *Pou5f1* (in blue) and *Pou5f3* (in green) are respectively shown in left  
1100 and right panels. In lampreys, the single homologue found for *Pou5* is shown in teal below its  
1101 gnathostome counterparts. It shares conserved synteny both with gnathostome *Pou5f1* (*Tcf19*,  
1102 *Chcr1*) and *Pou5f3* (*Fut7*) loci. Species names are as follows: great white shark, *Carcharodon*  
1103 *carcharias*; thorny skate, *Amblyraja radiata*; African lungfish, *Protopterus annectens*; African  
1104 clawed frog, *Xenopus laevis*; Eastern fence lizard, *Sceloporus undulatus*; Western terrestrial  
1105 garter snake, *Thamnophis elegans*; green sea turtle, *Chelonia mydas*; Chinese alligator,  
1106 *Alligator sinensis*; Emu, *Dromaius novaehollandia*; Platypus, *Ornithorhynchus anatinus*; agile  
1107 opossum, *Gracilinanus agilis*; human, *Homo sapiens*; reedfish, *Erpetoichthys calabaricus*;  
1108 spotted gar, *Lepisosteus oculatus*; European eel, *Anguilla anguilla* **c**, Conserved synteny  
1109 between pairs of paralogous genes (*Clic1/Clic3*, *Traf2/Traf2* and *Npdc1/Npdc1l* respectively in  
1110 yellow, red and purple arrows) found in the vicinity of gnathostome *Pou5f1* and *Pou5f3* genes in  
1111 the great white shark, lungfish and reedfish. These synteny are broadly conserved in  
1112 chondrichthyans, sarcopterygians and actinopterygians (see Supplementary Information 1). **d**,  
1113 Phylogenetic tree showing the evolutionary rates of cyclostome POU5, gnathostome POU5F1  
1114 and POU5F3 sequences in different vertebrate lineages. Evolutionary rates were calculated  
1115 from the alignment of POU specific domain, linker and homeodomain (as shown in the  
1116 Supplementary Dataset 1) using BEAST, by imposing the monophyly of gnathostome POU5F1  
1117 and POU5F3 and the species phylogeny within these groups. They are represented along tree  
1118 branches in black, green to red from low, moderate to high. Asterisks show branches in which  
1119 accelerations of evolutionary rates have taken place. The scale bar corresponds to the average  
1120 number of amino acid changes per site. Species name abbreviations are listed in Supplementary  
1121 Information 1.

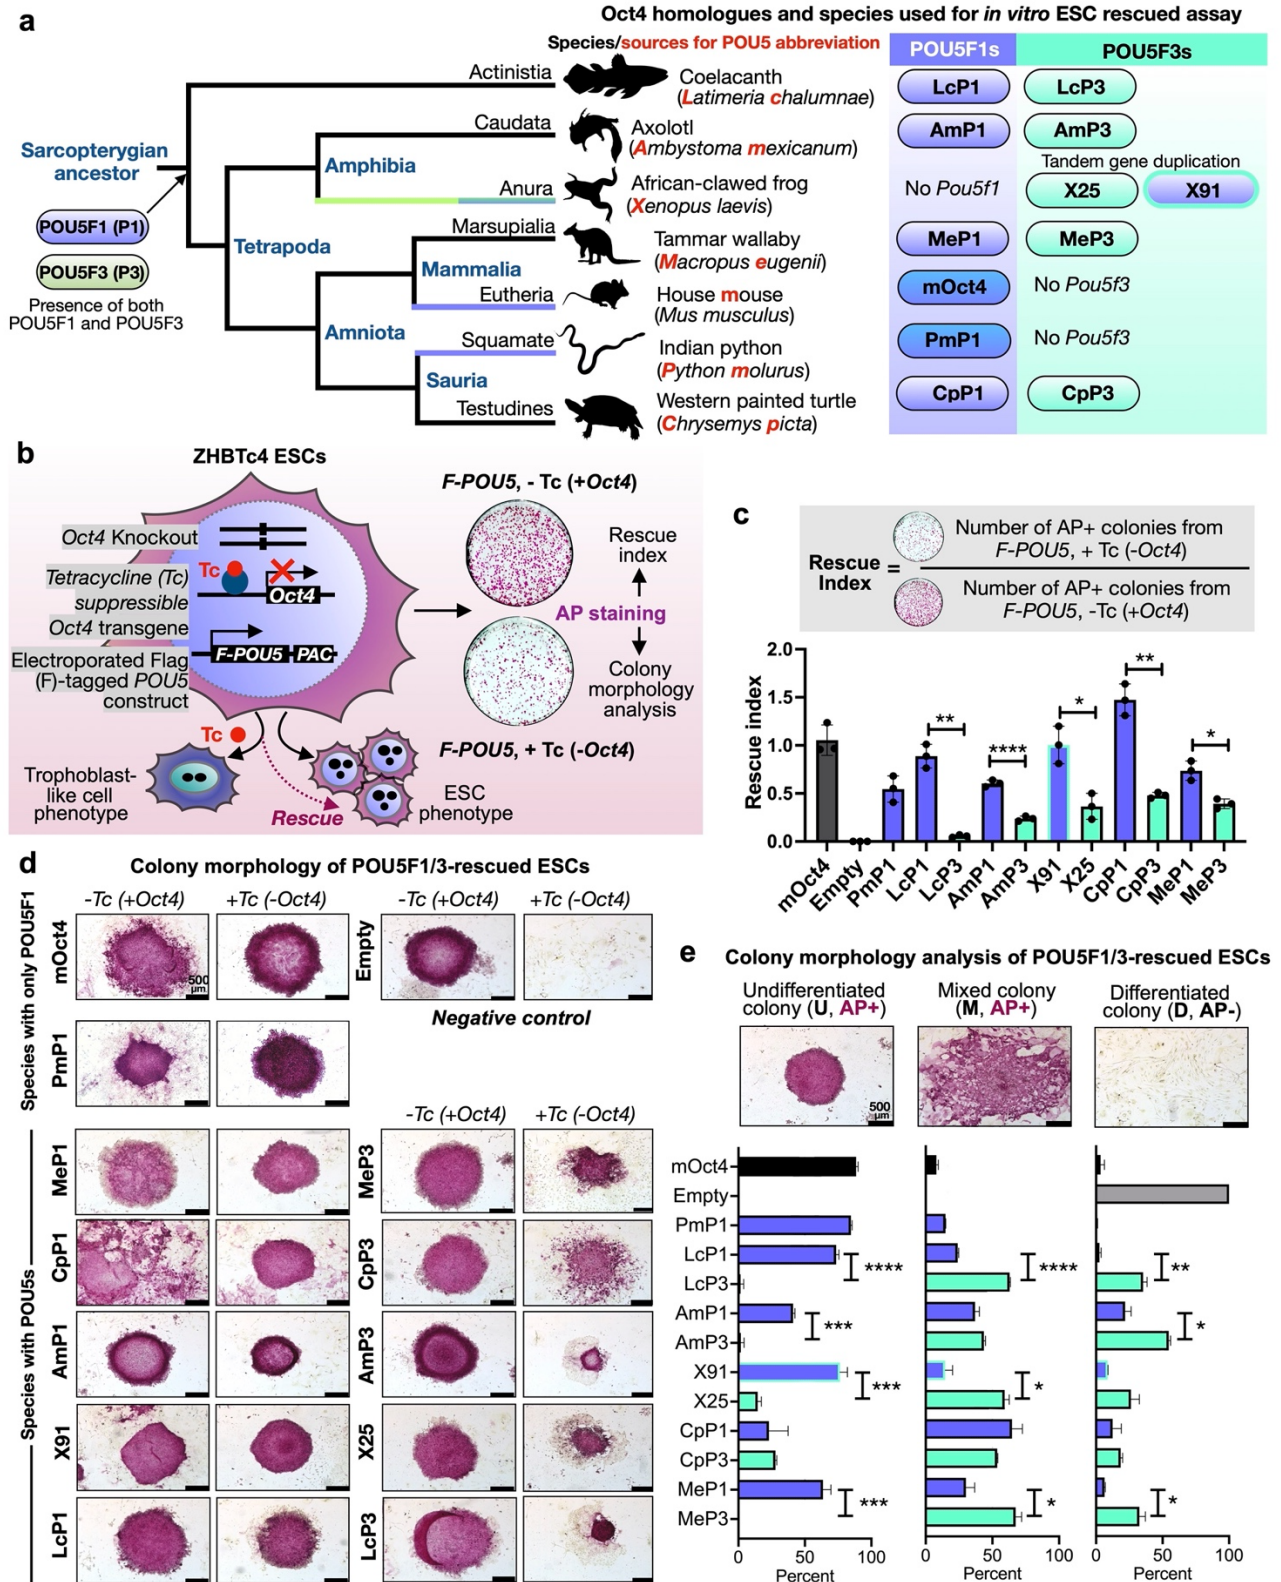

1122

1123



1124 **Fig. 2 Sarcopterygian POU5F1 proteins have greater capacity to rescue mouse**  
1125 **OCT4-null ESC cells than their POU5F3 paralogues**

1126 **a**, Schematic illustration showing simplified phylogenetic tree of Sarcopterygian species used  
1127 for testing POU5 protein activities and introduction of POU5 abbreviations used in this study  
1128 (letters in red). **b**, Experimental strategy (rescue assay) used to test the capacity of exogenous  
1129 POU5 proteins (from different vertebrate species) to rescued ZHBTc4 ESCs pluripotency and  
1130 self-renewal capacity, upon the addition of Tetracycline (Tc). **c**, Rescue indices indicating the  
1131 capacity of different POU5 homologues to support ESC self-renewal. **d**, Colony phenotypes  
1132 obtained from POU5-transfected OCT4-null ESC cells grown in the presence or absence of  
1133 mouse Oct4 (-/+ Tc) at clonal density and stained for Alkaline Phosphatase (AP) activity  
1134 (purple). **e**, Classification and quantification of ESC colony phenotypes from rescue assay.  
1135 Colonies were scored as undifferentiated (U), mixed (M), differentiated (D) and AP  
1136 positive/negative (+/-) colonies. Statistical analyses (Unpaired t-Test) were performed on n=3  
1137 biological replicates (3 independent experiments). Error bars indicate standard deviation.

1138

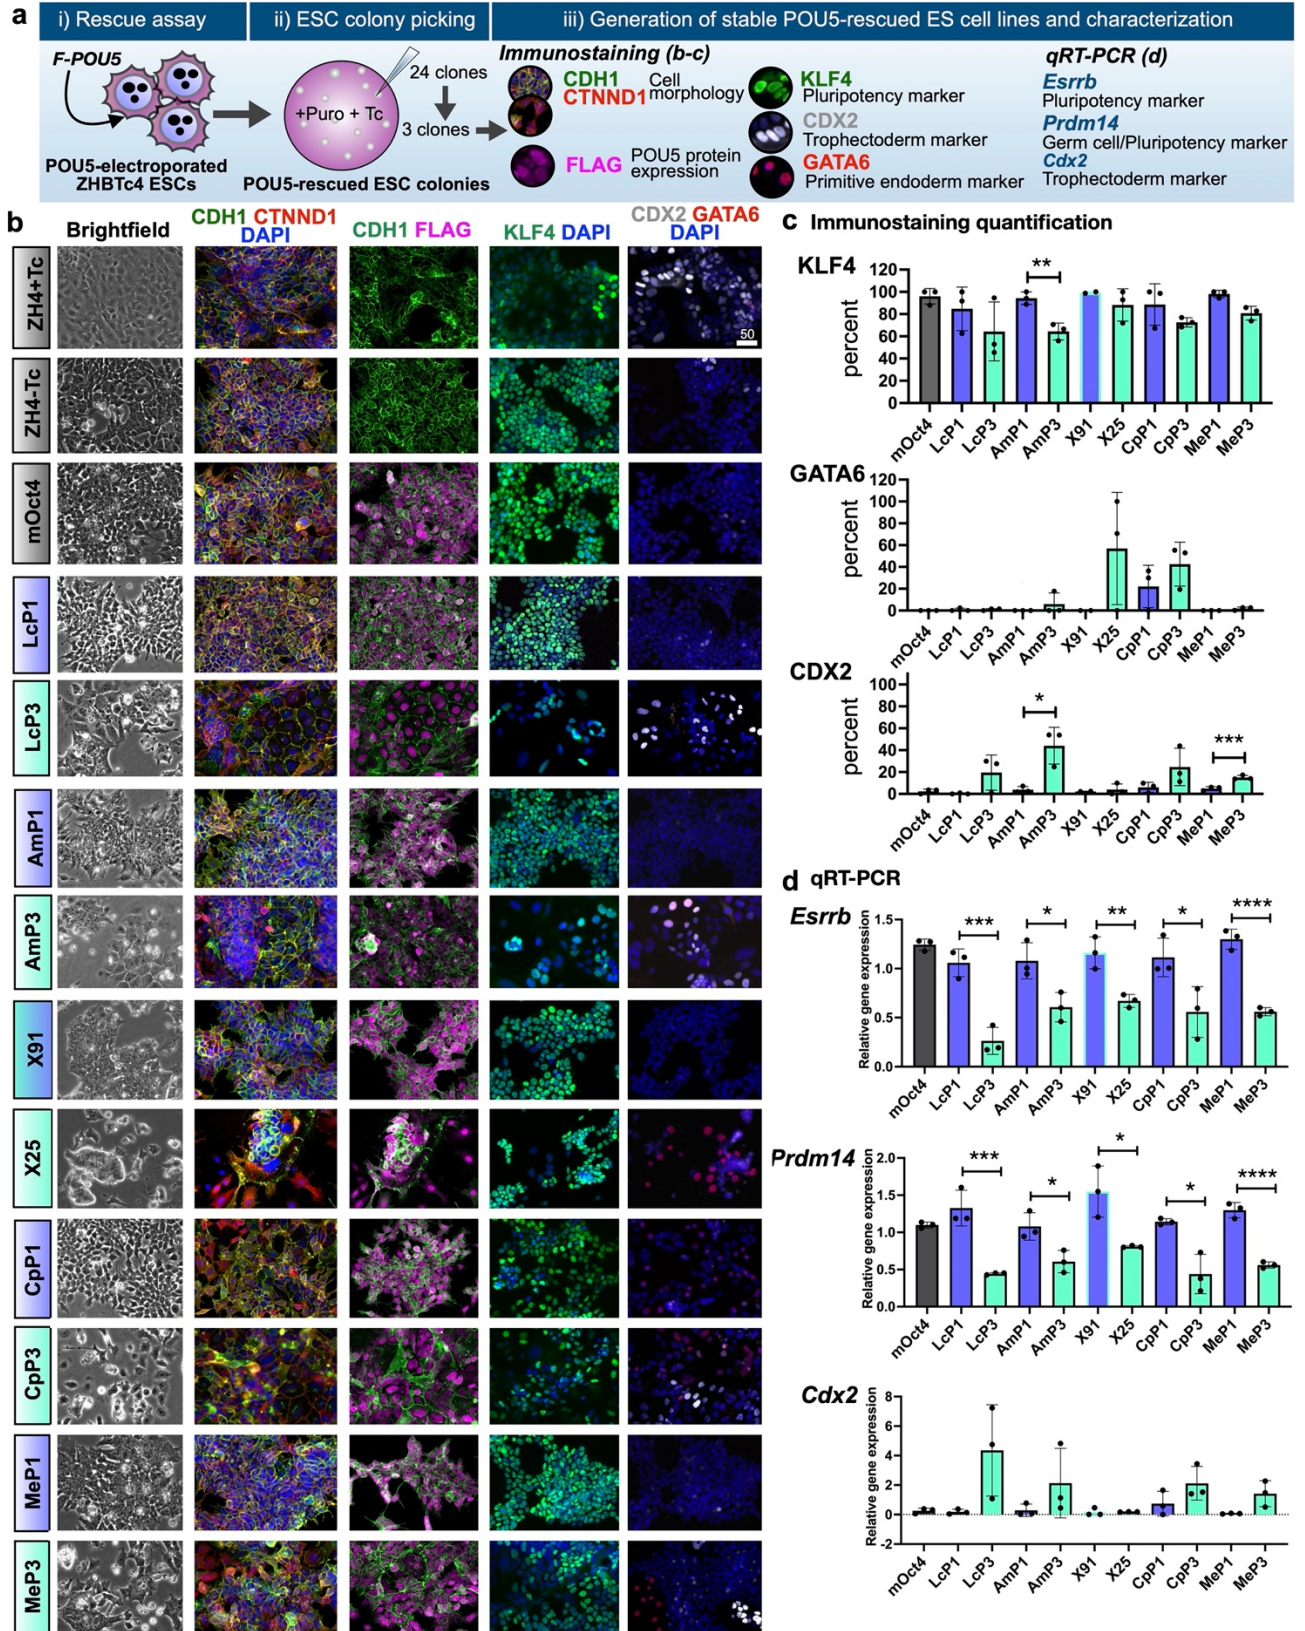

1139  
1140

1141 **Fig. 3 Phenotypes of ESC lines supported by sarcopterygian POU5 proteins**

1142 **a**, Experimental strategy used to derive stable ZHBTc4 cell lines rescued by either POU5F1 or  
1143 POU5F3. **b**, Representative immunofluorescence staining of ZHBTc4-rescued cell lines. Anti-  
1144 FLAG antibodies were used to detect and localize FLAG-tagged POU5 proteins, anti-KLF4 to  
1145 assess pluripotency, anti-CDX2 and anti-GATA6 to assess differentiation and anti-CDH1 and  
1146 anti-CTNND1 to assess cell morphology. **c**, Quantification of biological replicates from  
1147 immunofluorescence images showing the percentage of KLF4, CDX2 and GATA6 positive  
1148 cells compared to DAPI (total nuclei). **d**, Relative expression of pluripotency markers (*Esrrb*  
1149 and *Prdm14*) and differentiation marker (*Cdx2*) in the rescued cell lines quantified by qRT-  
1150 PCR. The abbreviations for POU5 proteins are the same as in Fig. 2a. Statistical analyses  
1151 (Unpaired *t*-Test) were performed on n=3 biological replicates (stable clones expanded from  
1152 the same POU5 rescue experiment).

1153



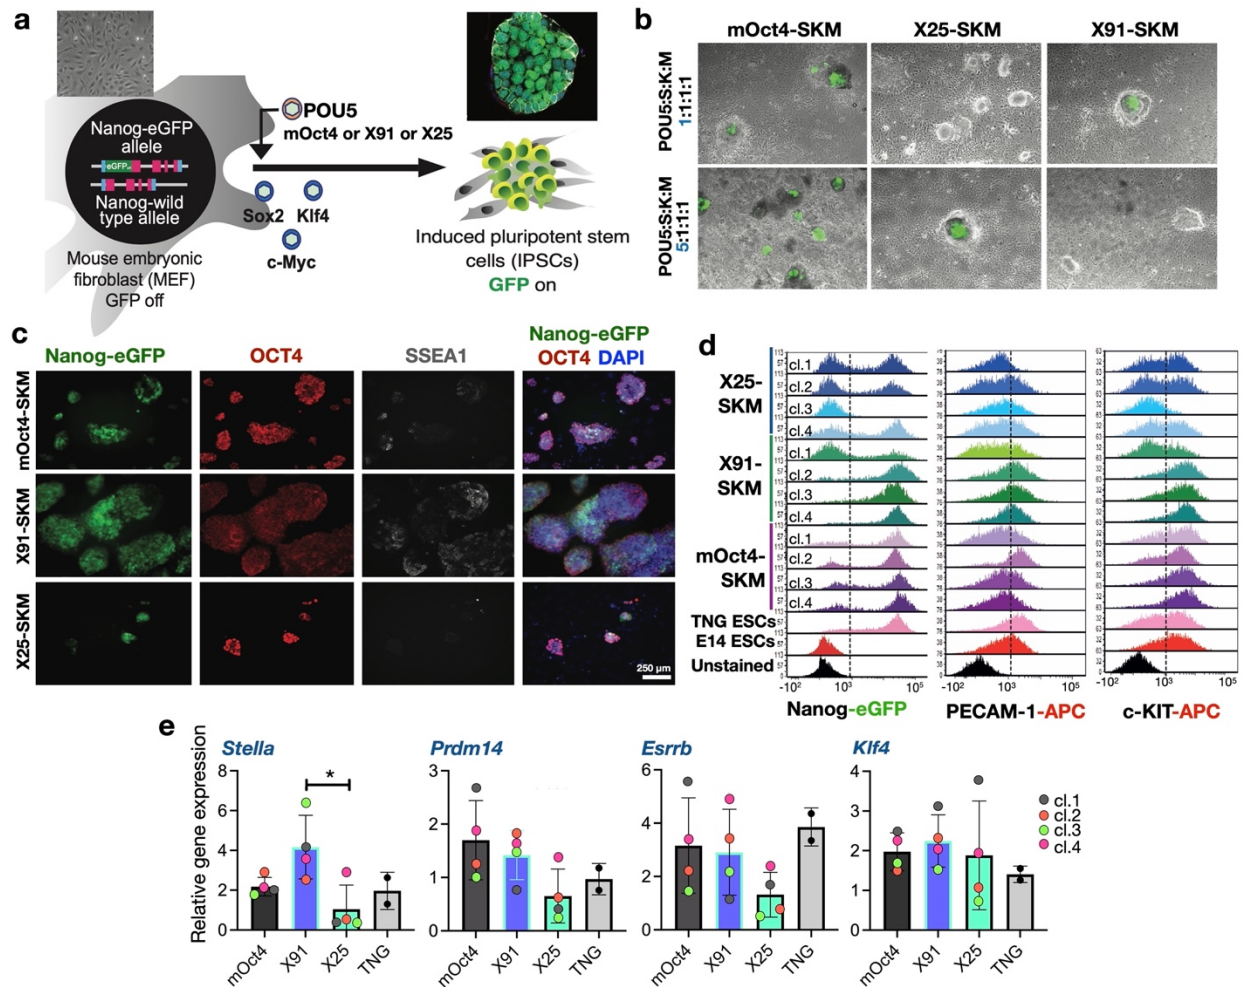

1154

1155 **Fig. 4 Duplicate POU5 homologues from frog display segregated functions in**  
 1156 **pluripotency establishment**

1157 **a**, Experimental strategy used for murine iPSC generation by retrovirus-based approach.  
 1158 Nanog-GFP mouse fibroblasts were used as a source of somatic cells to monitor the emergence  
 1159 of pluripotency (Nanog positive/green). *Oct4* in OSKM cocktail was replaced with either frog  
 1160 X25 or X91 and either low or high titre of viral infection (for *Oct4* homologues). **b**, Merged  
 1161 images of brightfield and Nanog-GFP represent iPSC colonies at day 24 post-infection. **c**,  
 1162 Characterisation of *Xenopus* POU5s and mOct4-derived iPSC clonal lines by  
 1163 immunofluorescence. Anti-Oct4 and anti-SSEA1 antibodies were used to detect a pluripotency  
 1164 and a germ cell marker, respectively. **d**, Flow Cytometry histograms representing Nanog-GFP,  
 1165 PECAM-1 and c-KIT profiles of mOct4/X91/X25 SKM iPSC clonal lines. **e**, Relative gene  
 1166 expression of germ cells (*Stella* and *Prdm14*) and naïve pluripotency (*Esrrb* and *Klf4*) markers  
 1167 was analysed by qRT-PCR. Data points of each clone (cl.) are also shown. Statistical analyses  
 1168 (Unpaired t-Test) were performed on n=4 biological replicates (from 3 independent  
 1169 experiments).

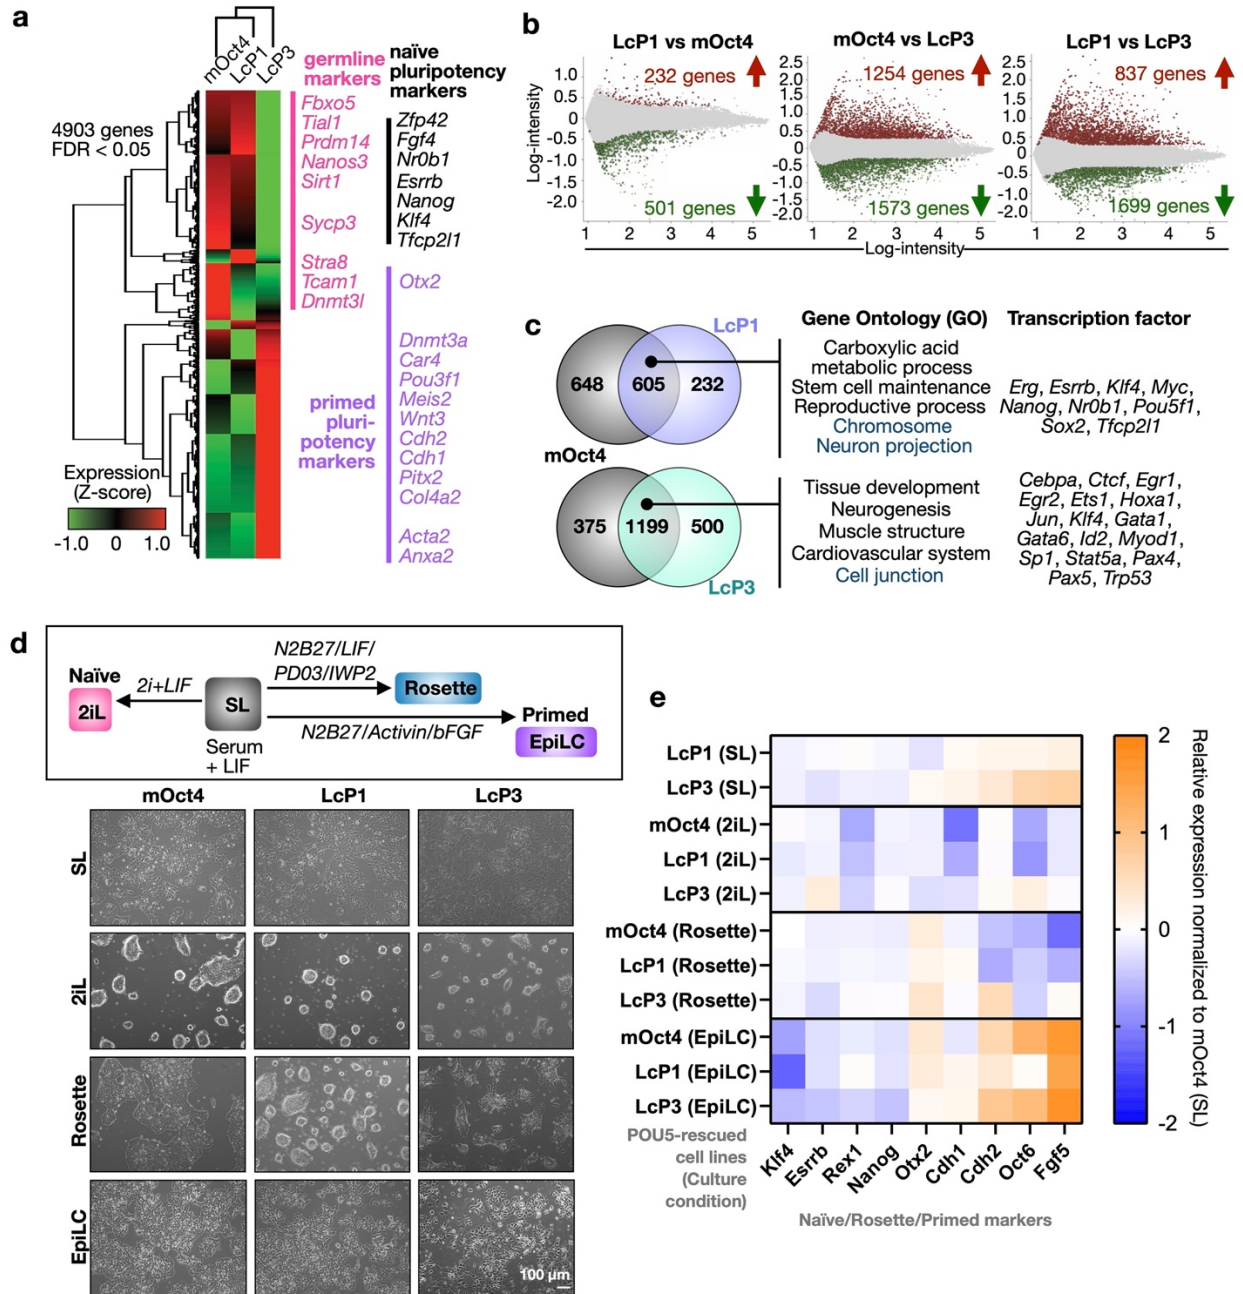

1170

1171

1172 **Fig. 5 Distinct naïve-primed pluripotency phenotypes are supported by**  
1173 **sarcopterygian POU5F1 and POU5F3 proteins**

1174 **a**, Heatmap illustrating hierarchical clustering of 4903 differentially expressed genes between  
1175 the mOct4, LcP1, LcP3-rescued ESC cell lines (fold-change threshold  $\geq 2$  and FDR  $\leq 0.05$ ).  
1176 The normalised expression level (z-score) of each gene is shown in three-colour format where  
1177 red, black, green indicate high, medium and low gene expression levels, respectively. **b**, Log-  
1178 ratio plots showing significantly over-expressed (red) and under-expressed (green) probes,  
1179 based on the indicated pairwise comparisons (FDR  $\leq 0.05$ ). These gene lists were further  
1180 filtered based on probes corresponding to uniquely annotated genes and with an absolute fold-  
1181 change cut-off of 2. **c**, Venn diagrams show a common signature in LcP1, LcP3 and mOct4  
1182 supported cells. In particular, we find a set of 605 over-expressed genes (a significant majority  
1183 of both comparisons) and 1199 under-expressed genes common to both LcP1 and mOct4  
1184 supported cells, compared to cells supported by LcP3. GO-term analysis (ShinyGO v0.66:  
1185 Biological Process and Cellular Component, FDR  $\leq 0.05$ ) and transcription factor targets  
1186 (ShinyGO v0.66: TF.Target.RegNetwork, FDR  $\leq 0.05$ ) of these gene lists is shown on the right  
1187 side of the Venn diagram. Full gene list is shown in Supplementary Table 2. **d-e**, Naïve-primed  
1188 conversion of coelacanth LcP1 and LcP3 rescued ESCs. Cell morphology of the LcP1, LcP3  
1189 and mOct4-rescued cells in naïve-primed conversion is shown in bright-field images in panel  
1190 **d**. The rescued ESC lines, originally cultured in ESC medium (serum + LIF, SL), were driven  
1191 toward either naïve or primed states: (1) 2i + LIF (2iL) medium, representing the naïve state;  
1192 (2) Rosette-like stem cells medium, representing the intermediate state between naïve and  
1193 primed; (3) Epiblast-stem-Cell-Like cells (EpiLC) medium, representing primed state. **e**,  
1194 Heatmap representing relative gene expression profiles of naïve, rosette and primed  
1195 pluripotency markers as well as cell adhesion markers. Three clones of LcP1 and LcP3 cell  
1196 lines into SL/Rosette/EpiLC conditions, alongside with ZHBTc4 control, were analysed by  
1197 qRT-PCR.

1198  
1199



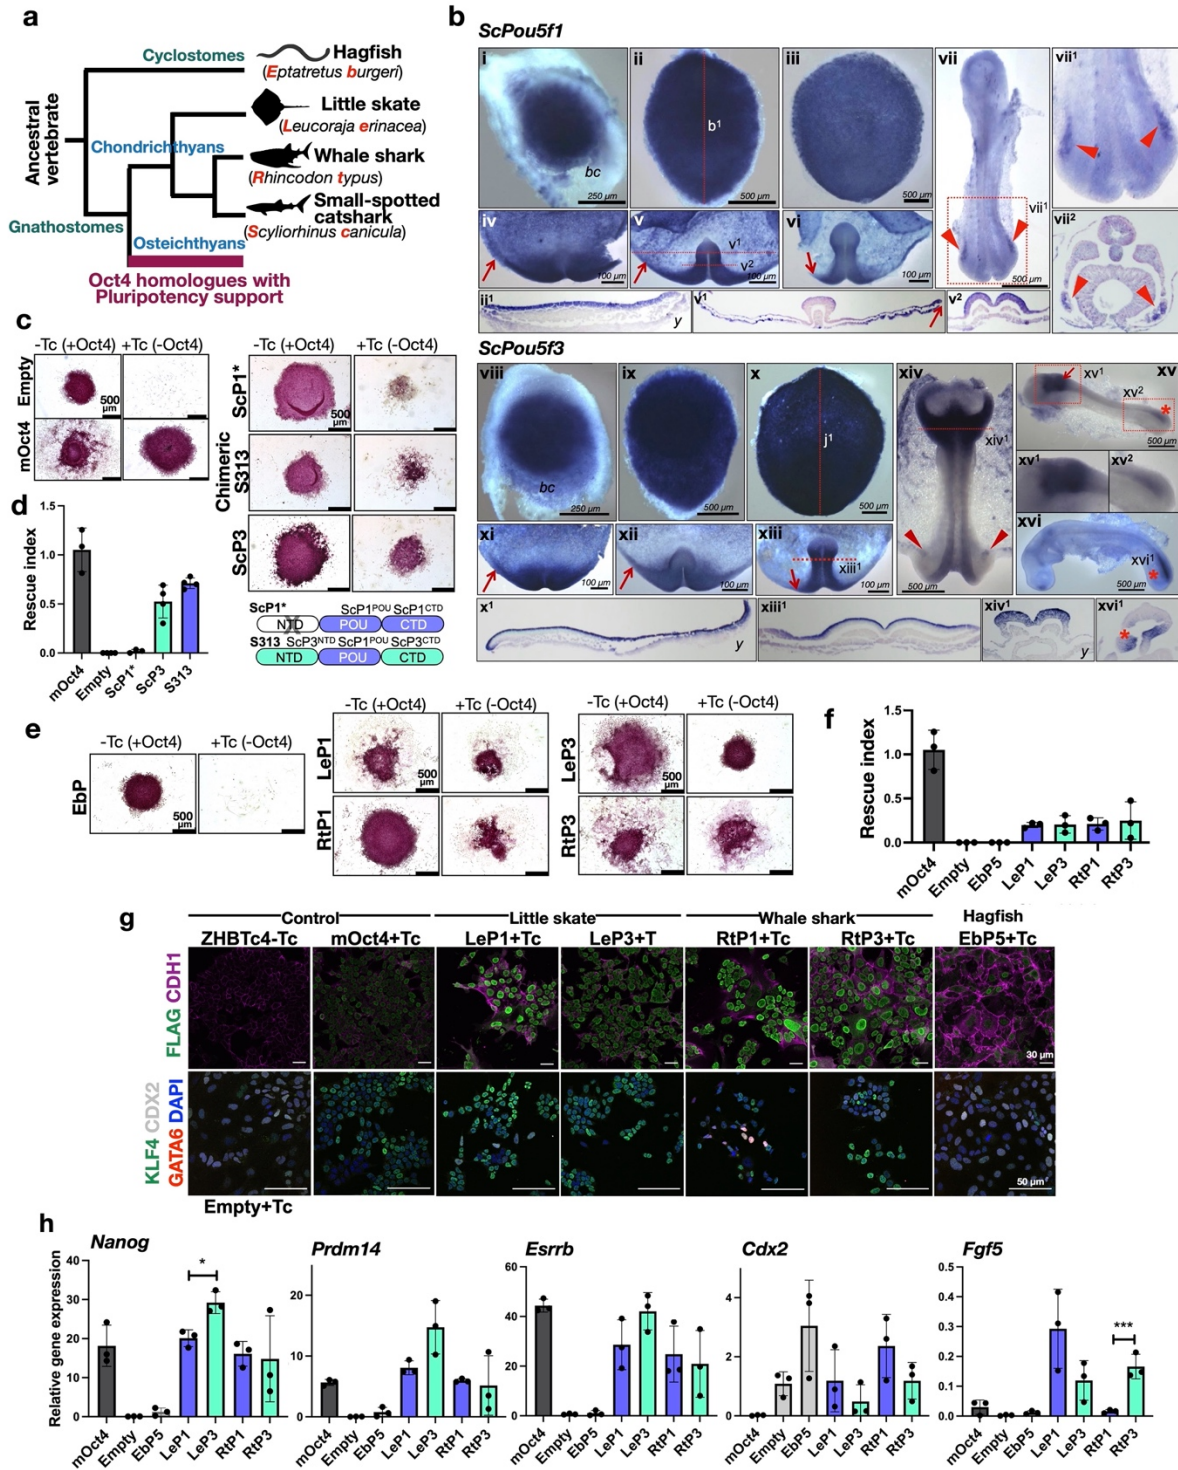

1200  
1201

1202 **Fig. 6 Chondrichthyan but not cyclostome POU5 proteins have the capacity to**  
1203 **support pluripotency**

1204 **a**, Schematic illustration showing simplified phylogenetic tree of cyclostome and  
1205 Chondrichthyan species used for testing POU5 protein activities. Abbreviation used in this  
1206 study are shown in red. **b**, Whole-mount views of catshark embryos following *in situ*  
1207 hybridisations with probes for *Pou5f1* (*ScP1*) (**i-vii**) or *Pou5f3* (*ScP3*) (**viii-xvi**). Description of  
1208 each panel is noted in Supplementary Information 3. **c**, AP staining of ZHBTc4 ESC colonies  
1209 supported by ScP1 and ScP3, cultured in the presence or absence of mOct4 (-/+ Tc). Due to  
1210 missing N-terminal domain sequence data of ScP1 (ScP1\*), a chimeric form of the protein  
1211 (named S313) was also tested and a cartoon of the swapping construct is shown on the bottom-  
1212 right. **d**, Rescue indices indicating the capacity of catshark ScP1 and ScP3 to support ESC self-  
1213 renewal. **e**, AP staining of ZHBTc4 ESC colonies supported by different POU5 proteins  
1214 including whale shark (Rt), little skate (Le) from chondrichthyans and hagfish (Eb) from  
1215 cyclostomes. **f**, Rescue indices indicating the capacity of different POU5s to support ESC self-  
1216 renewal. **g-h**, Phenotypes of rescued ESC lines supported by chondrichthyan POU5 proteins  
1217 compared to non-rescued cells supported by cyclostome POU5 protein. As Hagfish POU5  
1218 (EbP5) cannot rescue, EbP5 expressing colonies were picked and expanded in the absence of  
1219 Tc, then treated with Tc for four days to remove mOct4 prior to further analysis. **g**,  
1220 Immunofluorescence staining of POU5 rescued cells using antibodies directed against FLAG-  
1221 tagged POU5 and CDH1 (E-cadherin) (top panel) and ESC (KLF4)/differentiation (GATA6  
1222 and CDX2) markers with DAPI stained nuclei (bottom panel). **h**, Relative expression of naïve  
1223 pluripotency (*Nanog*, *Prdm14* and *Esrrb*), primed pluripotency (*Fgf5*) and trophectoderm  
1224 markers (*Cdx2*) in POU5-rescued cells, quantified by qRT-PCR. Statistical analyses (Unpaired  
1225 *t*-Test) were performed on n=4 biological replicates (4 independent experiments for rescue  
1226 index) and n=3 biological replicates (stable clones expanded from the same POU5 rescue  
1227 experiment).

1228



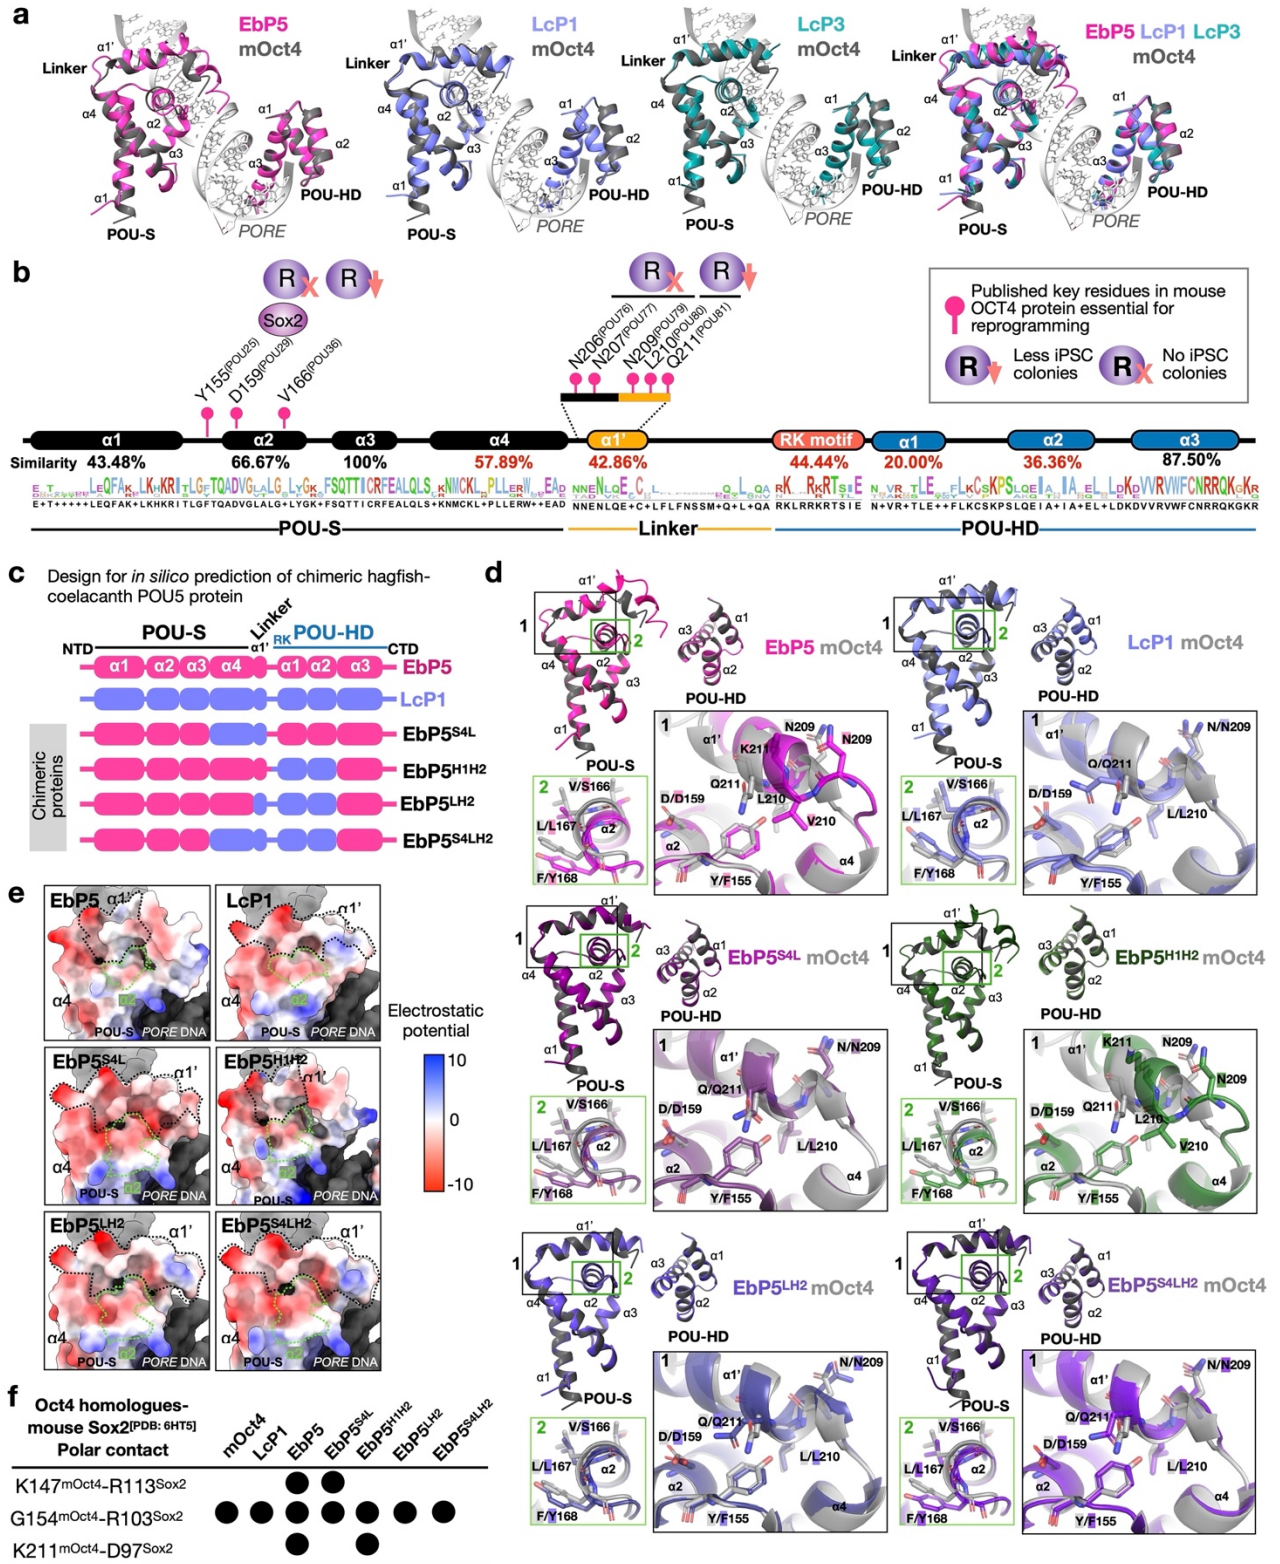

1229  
1230

1231 **Fig. 7 AlphaFold2-based structural models of POU5 homologues predict**  
1232 **unique orientations for specific  $\alpha$ -helices**

1233 **a**, AlphaFold2-based structural prediction models for ordered regions (POU-S-L $\alpha$ 1' and POU-  
1234 HD) of coelacanth and hagfish POU5 proteins visualized by ChimeraX with superimposition  
1235 to mOct4 (grey) on the *PORE* DNA element (PDB ID: 3L1P). **b**, Degree of conservation from  
1236 the alignment of EbP5, LcP1 and mOct4 protein sequences and key residues of mOct4 (see  
1237 Supplementary Figure 7 for more details). **c**, Design of EbP5-LcP1 chimeric proteins. We  
1238 replaced different combinations of un-conserved regions of hagfish EbP5 (pink) with  
1239 coelacanth LcP1 (lilac). **d**, AlphaFold2-based structural prediction models of chimeric hagfish-  
1240 coelacanth (Eb-Lc) POU5 proteins, with insets highlighting  $\alpha$ 2 from POU-S domain (S $\alpha$ 2) and  
1241  $\alpha$ 1' from Linker (L $\alpha$ 1'). Residues are also marked according to mOct4 numbering in  
1242 Supplementary Fig. 6. **e**, Predicted electrostatic surface potentials for chimeric proteins with  
1243 focus on the POU-S-Linker region. Surface charges were determined by ChimeraX, with  
1244 negatively charged areas shown in red and positively charged in blue. **f**, table summarizing  
1245 prediction of polar contact interactions between POU5 homologues/chimeric Eb-Lc POU5s and  
1246 mouse Sox2 using PyMol. Structural models of Eb-Lc chimeric POU5s were generated by  
1247 AlphaFold2 and the structure of Sox2 was retrieved from 6HT5  
1248 (<https://www.rcsb.org/structure/6ht5>). Number of specific residues indicated in the table are  
1249 related to mouse Oct4 (as shown in Supplementary Fig. 6) and mouse Sox2. Black dots  
1250 represent the presence of polar contact interactions.

1251  
1252

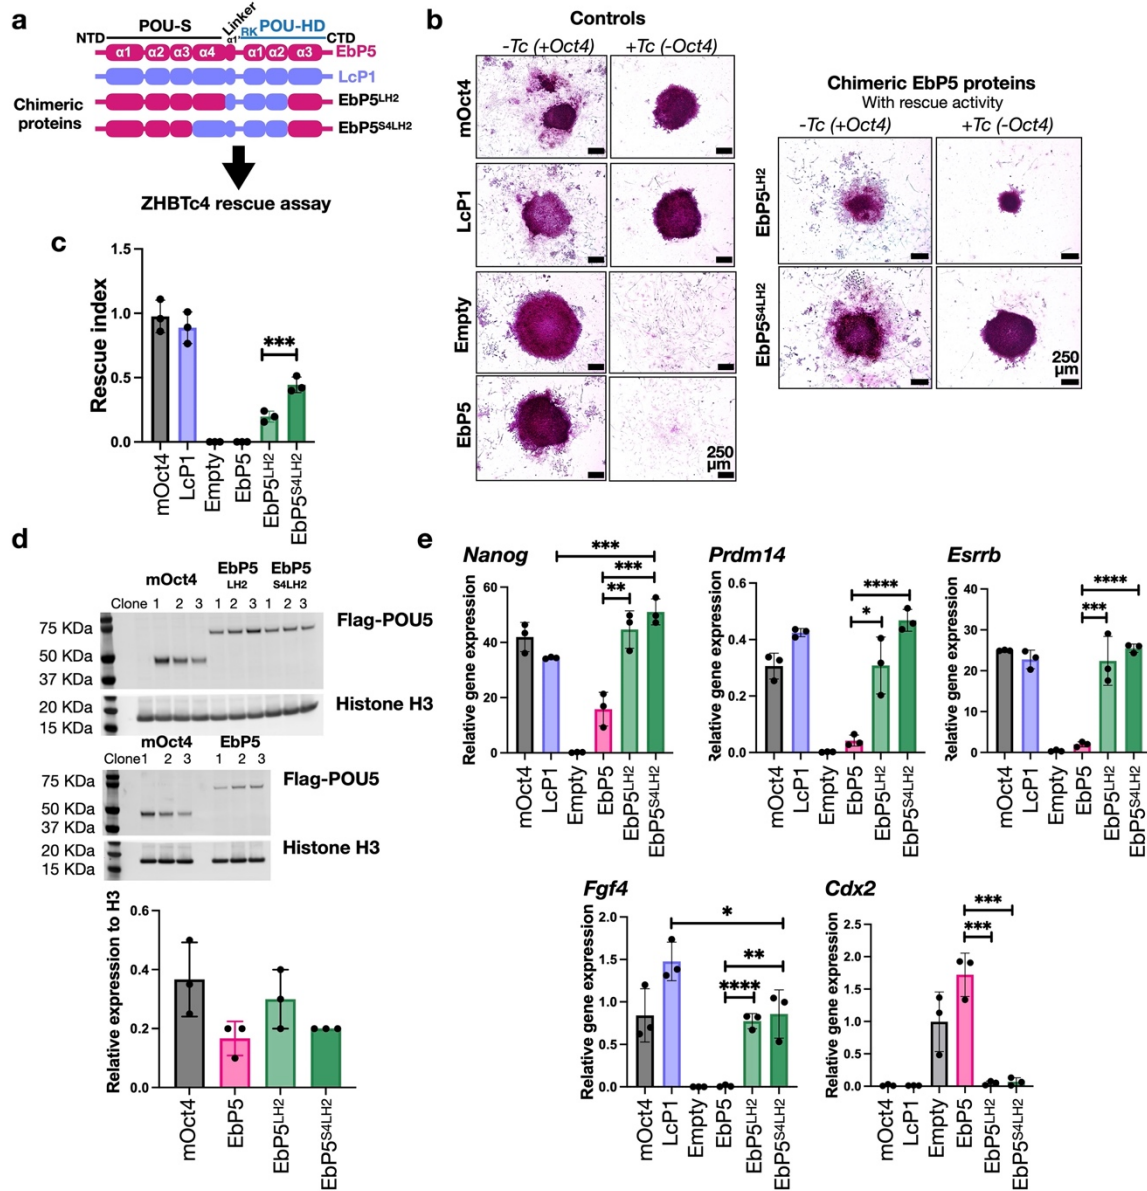

1253  
1254

1255 **Fig. 8 Replacing specific regions of hagfish POU5 with their coelacanth**  
1256 **POU5F1 counterparts is sufficient to rescue pluripotency in OCT4-null mouse**  
1257 **ESCs.**

1258 **a**, Design of the EbP5-LcP1 chimeras used to test rescue capacity in OCT4-null mouse ESCs

1259 **b**, Colony phenotypes of ZHBTc4 cells transfected with different chimeric POU5 proteins  
1260 grown in the presence or absence of mouse Oct4 (-/+ Tc) and stained for alkaline phosphatase

1261 (AP) activity (purple). **c**, Rescue index of OCT4-null ESCs rescued by chimeric hagfish POU5

1262 proteins. **d**, Western blot showing protein expression of 3xflag-tagged chimeric Eb-Lc POU5

1263 proteins from three rescued clones per species, with quantification below. **e**, Relative expression

1264 of naïve pluripotency (*Nanog*, *Prdm14*, *Esrrb* and *Fgf4*) and trophoctoderm markers (*Cdx2*) in

1265 chimeric hagfish POU5-rescued ESC clonal cell lines, quantified by qRT-PCR. Statistical

1266 analyses (Unpaired *t*-Test) were performed on n=3 biological replicates (stable clones expanded

1267 from the same POU5 rescue experiment).

1268



## Evolution of POU5 activities

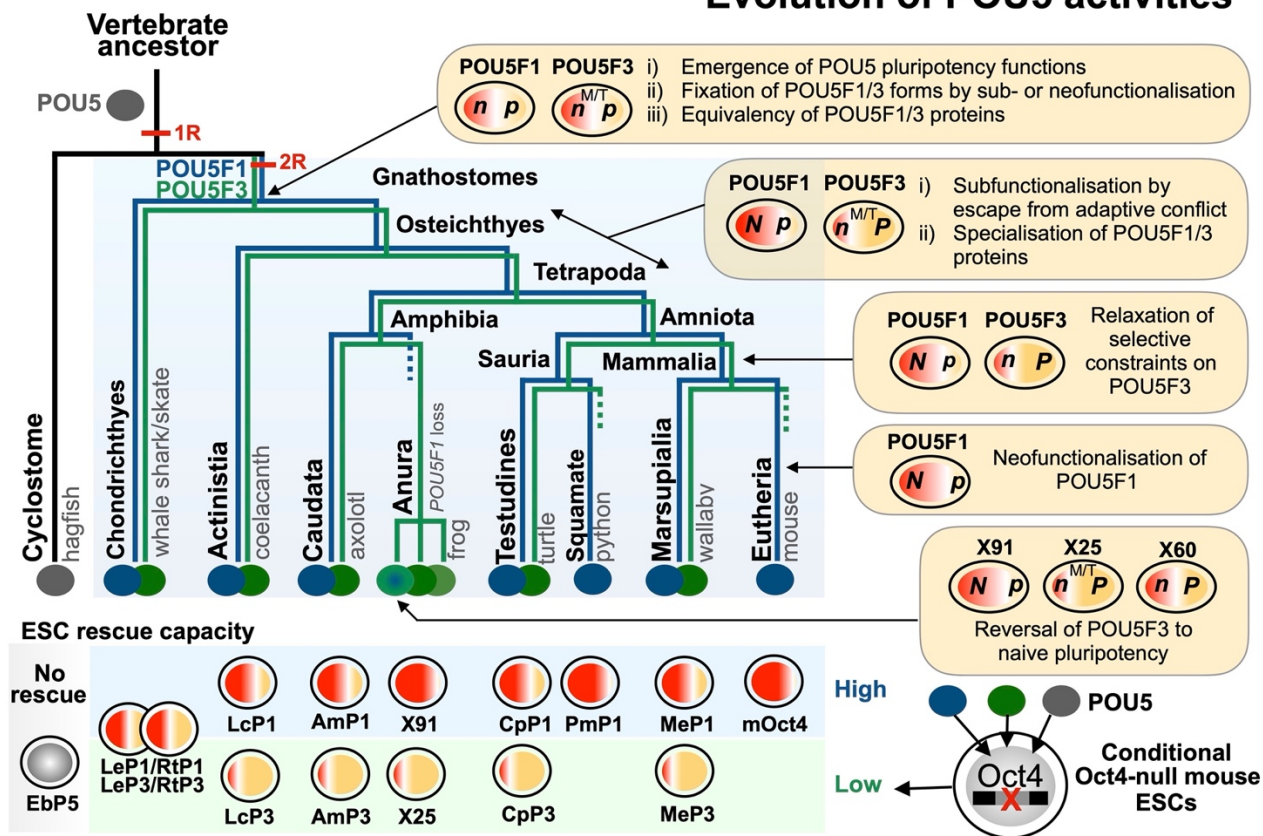

1269

1270

1271 **Fig. 9 Summary of the evolution of POU5 activities in vertebrates.**

1272 A simplified phylogenetic tree summarises the evolution of the *Pou5* gene family in vertebrates  
1273 as inferred from genomic searches and sequence analysis. Most salient events were (1) the  
1274 emergence of the family in the vertebrate lineage (black branch), (2) the maintenance of one  
1275 copy in cyclostomes (grey branch) and (3) a duplication giving rise to the two gnathostome  
1276 *Pou5f1* and *Pou5f3* paralogues (blue and green branches respectively), which may have been  
1277 part of the 1R/2R whole genome duplications that took place in vertebrates. Dotted lines  
1278 indicate lineages in which one paralogue was lost. Right panels point at key nodes of the tree  
1279 and indicate major milestones in the functional evolution of the gene family, as inferred from  
1280 expression and functional analyses of POU5F1 and POU5F3 proteins from selected species  
1281 (box at the bottom of the figure shows a summary of the activities observed in the Oct4 rescue  
1282 assay). These include (1) the emergence of the capacity of POU5 proteins to support  
1283 pluripotency, which predated the duplication generating the *Pou5f1* and *Pou5f3* genes, but is  
1284 not shared by cyclostome POU5 proteins, (2) the preservation of both gnathostome paralogues  
1285 possibly related to expression specificities, fixed for each form prior to the gnathostome  
1286 radiation, (3) functional specialisations of paralogous proteins that took place early in the  
1287 sarcopterygian lineage and could have paved the way to elaborations of naïve and primed  
1288 pluripotency states of eutherians. Additional evolutionary changes, including reversals or  
1289 innovations, have paralleled losses of one paralogue in anurans and in eutherians (*Pou5f1* and  
1290 *Pou5f3* respectively). N/n and P/p refers to the capacity of POU5 paralogous proteins to support  
1291 naïve and primed pluripotency in OCT4 rescue assays (“N” and “P” refer to a strong activity,  
1292 “n” and “p” to a low one). M/T refers to specific expression traits of *Pou5f3* at the neural tube,  
1293 anterior hindbrain and tailbud, conserved across gnathostomes, including chondrichthyans,  
1294 which may have contributed to the preservation of this paralogue following the *Pou5f1/Pou5f3*  
1295 gene duplication.

1296

1297 **Supplementary Information**

1298

**Painted turtle : Reptile retaining both POU5F1 and POU5F3**

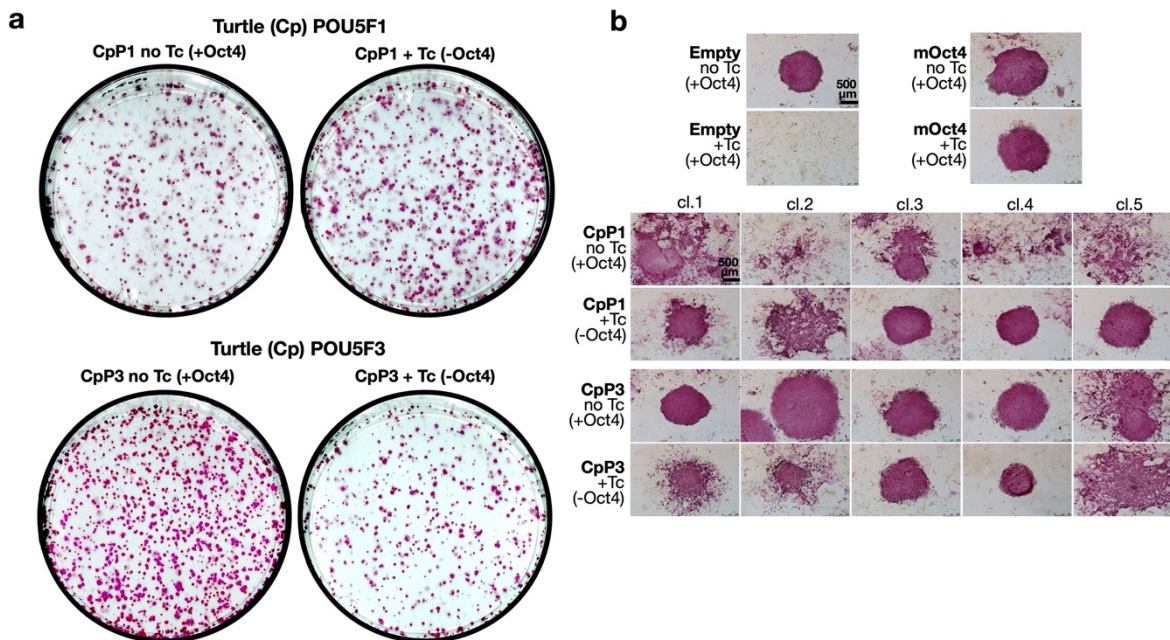

**Python (Squamate) : Reptile retaining only POU5F1**

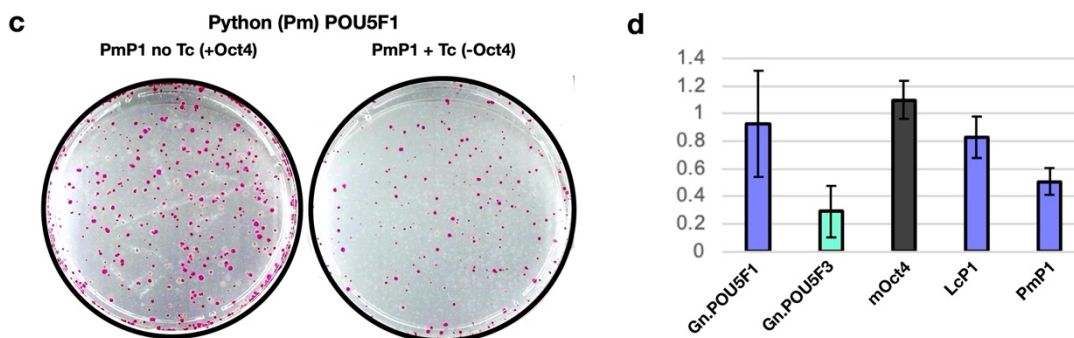

1299

1300 **Supplementary Fig. 1, related to Fig. 2 ESC colony morphology of reptilian**

1301 **POU5-rescued Oct4-null ESC cell lines.**

1302 **a-c**, Alkaline Phosphatase (AP) stainings. **a**, Overview of AP stained colonies (grown in 10cm  
1303 dishes) of ZHBTc4 cells +tc rescued with painted turtle (*Chrysemys picta*, Cp) POU5F1 and  
1304 POU5F3. ZHBTc4 cells were electroporated with POU5 vectors and cultured in the absence or  
1305 presence of tetracycline (= presence of Oct4 expression/absence of Oct4 expression). **b**, Colony  
1306 morphologies of Cp POU5-rescued ESC colonies. **c**, Overview of AP stained colonies (grown  
1307 in 10cm dishes) of OCT4-null ESCs rescued with python (*Python molurus*, Pm) POU5F1  
1308 (PmP1). **d**, Rescue index of OCT4-null ESCs rescued with PmP1 compared to coelacanth and  
1309 mouse POU5F1s and average of gnathostome POU5F1s and POU5F3s. Abbreviations: Tc,  
1310 Tetracycline.

1311



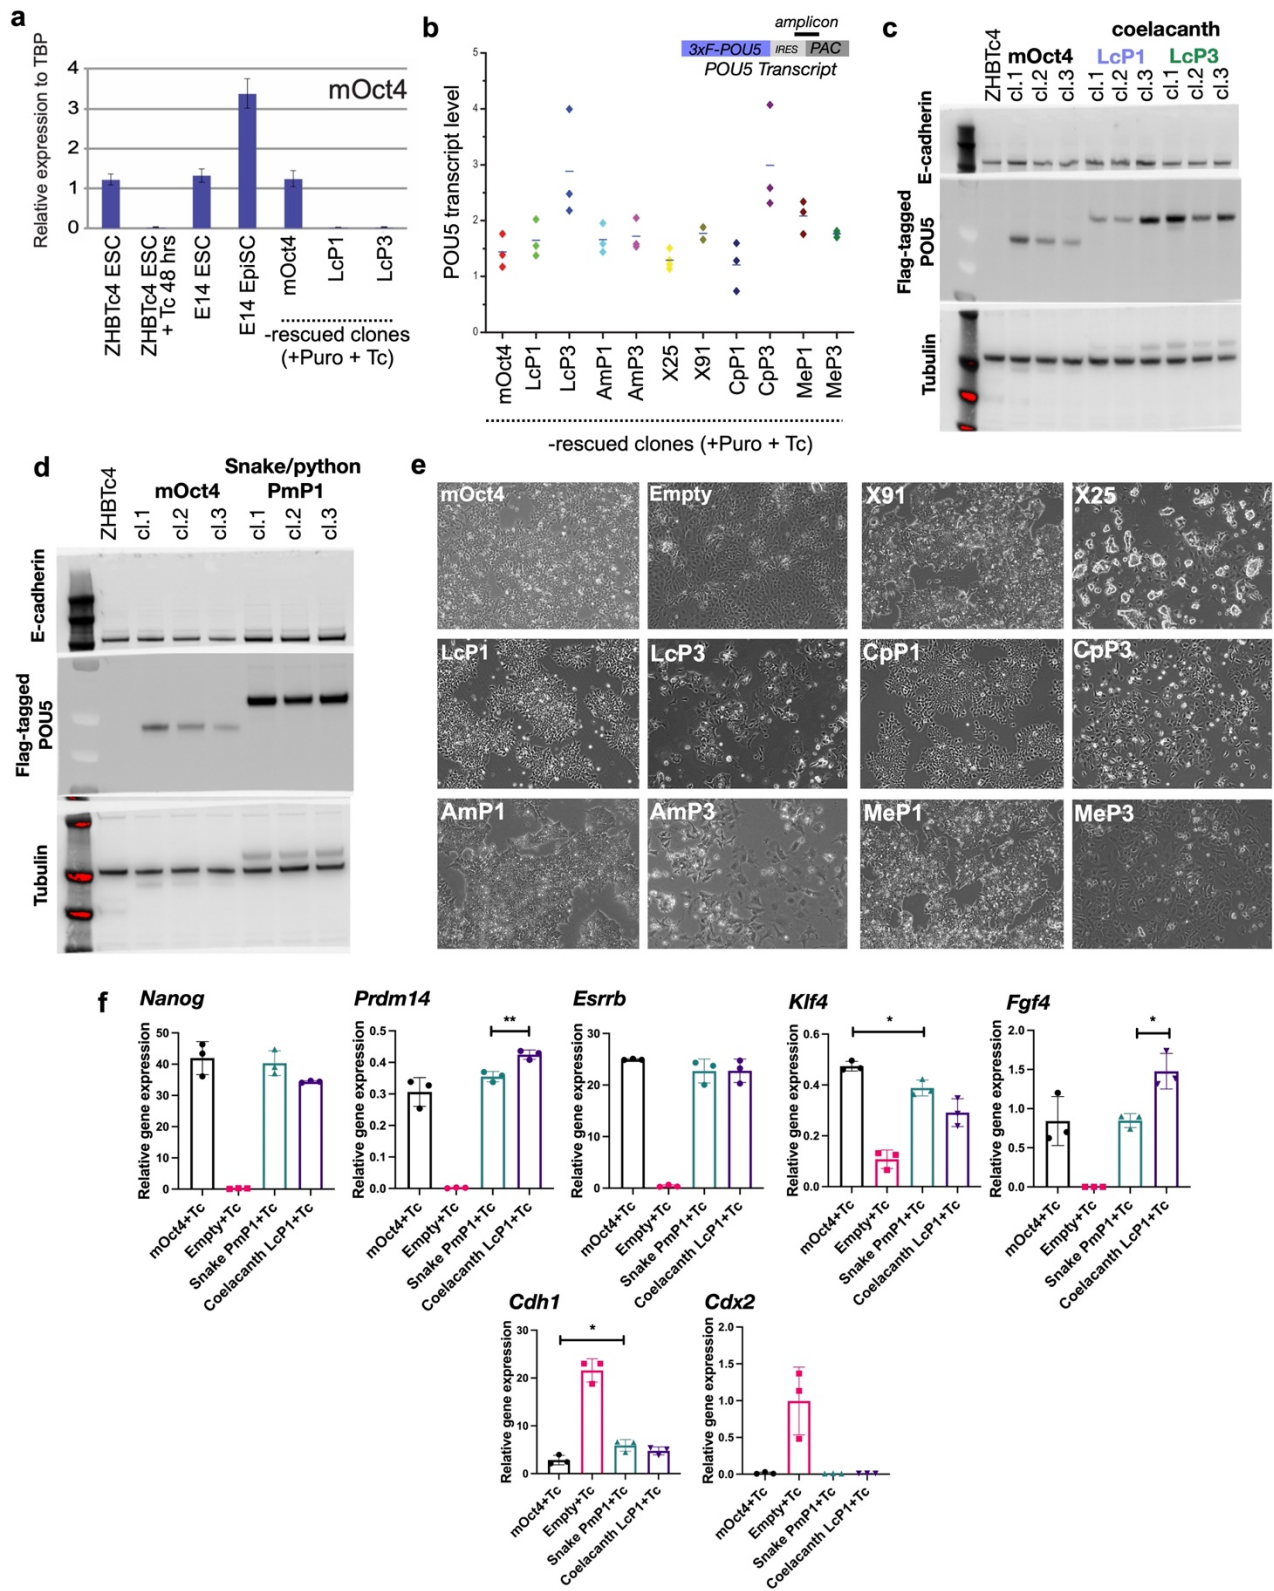

1312

1313

1314 **Supplementary Fig. 2, related to Fig. 3 Additional phenotypes of POU5-rescued**  
1315 **OCT4-null ESC cell lines.**

1316 **a**, Relative expression of mouse *Oct4* mRNA, measured by qRT-PCR, to confirm that POU5-  
1317 rescued ESC clonal lines were maintained solely by transfected POU5 constructs. **b**, qRT-PCR  
1318 showing expression of the puromycin-resistance gene used to indirectly measure POU5  
1319 transcript levels among different POU5-rescued clonal ESC lines. Data represented in the plot  
1320 show average values of three independent clonal lines with the horizontal bars between  
1321 diamond symbols representing the mean of these values. **c**, Western blot showing expression  
1322 of flag-tagged POU5 proteins. **d**, Bright-field images of OCT4-null ESC clonal lines rescued  
1323 by different POU5 proteins. Colonies from POU5-rescued ESCs were picked and expanded in  
1324 ESC culture containing tetracycline (Tc) for 6 passages before further cell analysis using  
1325 immunofluorescence and qRT-PCR (as shown in Fig. 3). OCT4-null cells don't grow in normal  
1326 ESC medium because POU5 activity is required for colonies expansion, therefore no rescued  
1327 colony could be picked from empty vector controls. To obtain ESCs without OCT4 expression,  
1328 used as control for immunofluorescence and qRT-PCR in Fig. 3, ZHBTc4 cells were  
1329 electroporated with the empty vector and cultured in the absence of Tc (presence of Oct4  
1330 expression). *Oct4* was later removed by addition of tetracycline for four days, to generate  
1331 differentiated control cultures. **e-f**, additional phenotypes of python POU5F1-rescued cell lines.  
1332 **e**, Western blot showing expression of flag-tagged PmP1 proteins. **f**, qRT-PCR, of OCT4-null  
1333 ESCs rescued with PmP1, for pluripotency markers (*Nanog*, *Prdm14*, *Esrrb*, *Klf4* and *Fgf4*),  
1334 cell adhesion (*Cdh1*) and differentiation markers (*Cdx2*). Abbreviations: Empty: empty vector;  
1335 Puro, Puromycin; abbreviations for POU5 proteins are the same as in Fig. 2. Statistical analyses  
1336 (Unpaired *t*-Test) were performed on n=3 biological replicates (stable clones expanded from  
1337 the same POU5 rescue experiment).

1338



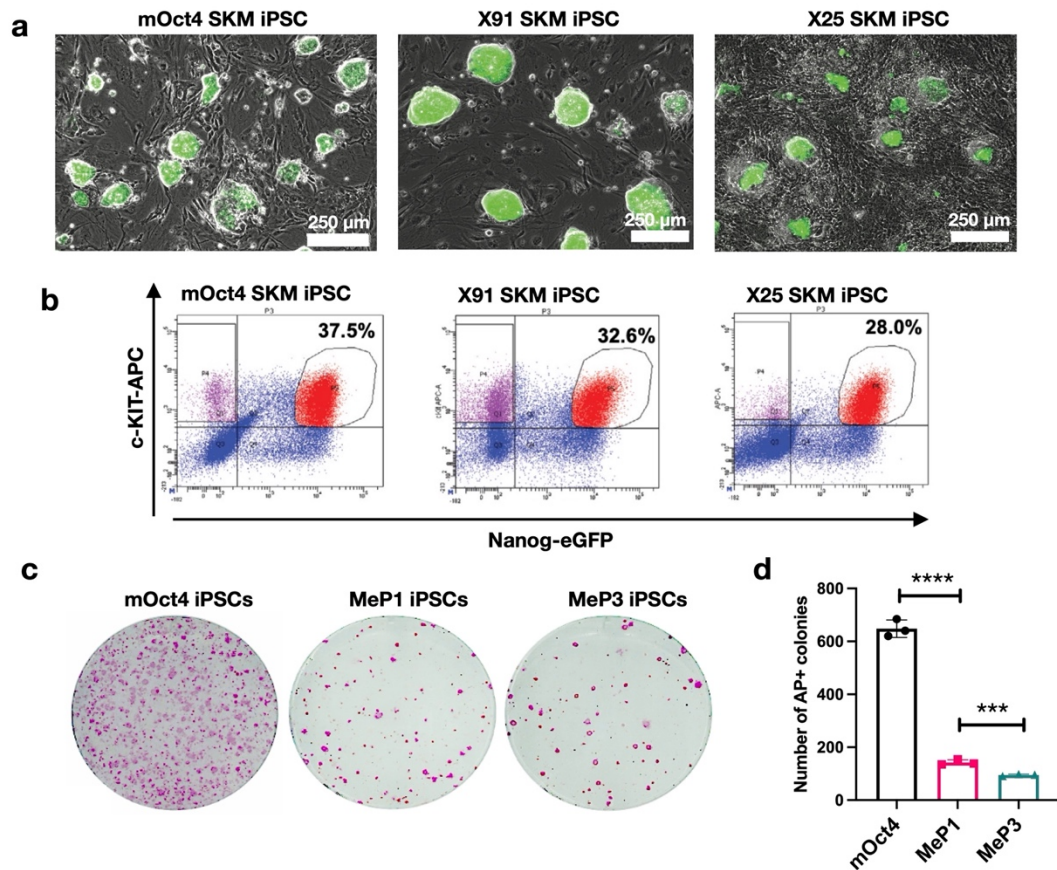

1339

1340 **Supplementary Fig. 3, related to Fig. 4 Additional phenotypes of mouse iPSCs**  
1341 **generated by different POU5s.**

1342 **a**, Merged brightfield and Nanog-eGFP (green) expression of iPSCs generated with different  
1343 POU5 proteins: mOct4, X91 or X25 together with Sox2, Klf4 and c-Myc (SKM). **b**, Nanog-  
1344 eGFP and a cell surface marker c-KIT profile for assessing naïve pluripotency of iPSCs  
1345 generated from X91, X25 or mOct4 were analysed by flow cytometry and showed as dot plots.  
1346 **c**, Overview of AP stainings (purple) of iPSCs generated by tammar wallaby Pou5f1 (MeP1)  
1347 and Pou5f3 (MeP3) together with mSox2, mKlf4 and mc-Myc. **d**, Reprogramming efficiency  
1348 of iPSCs generation comparing tammar wallaby POU5F1/3 (MeP1 and MeP3) to mouse Oct4.  
1349 Statistical analyses (Unpaired *t*-Test) were performed on n=3 biological replicates (3 times of  
1350 infection (the same batch for virus production) and in 3 different seeding onto irradiated MEF).

1351

1352

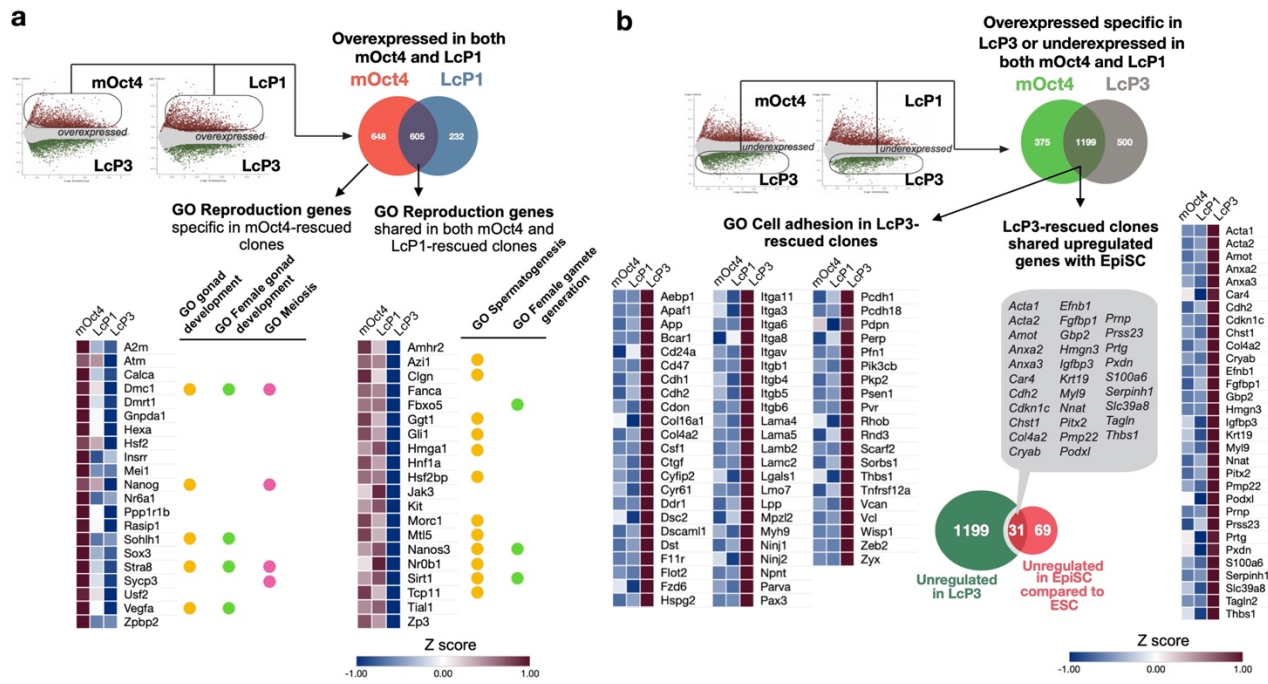

1353  
1354

1355 **Supplementary Fig. 4, related to Fig. 5 Difference in the gene expression**

1356 **profiles of OCT4-null ESCs supported by LcPOU5F1, mOct4 and LcPOU5F3.**

1357 **a-b**, Log-ratio plots showing significantly over-expressed (in red) and under-expressed (in  
1358 green) probes, based on indicated pairwise comparisons ( $FDR \leq 0.05$ ). These gene lists were  
1359 further filtered based on probes corresponding to uniquely annotated genes and with an absolute  
1360 fold-change cut-off of 2. Differentially expressed genes from both comparisons were used to  
1361 produce Venn diagrams to further identify common genes expressed in both mOct4 and LcP1-  
1362 supported ESCs or specific to LcP3-supported ESCs. **a**, Over-expressed genes (605 genes) in  
1363 common to mOct4 and LcP1-supported cells and over-expressed genes (648 genes) specific to  
1364 mOct4-supported cells were analysed by the GO term analysis tool ShinyGO ( $FDR \leq 0.05$  and  
1365 GO terms with more the 5 genes are shown). Expression of genes in the ‘Reproduction’ GO  
1366 term were enriched in both mOct4- and LcP1-rescued clones were shown as heatmaps. **b**, Over-  
1367 expressed genes (1199) in LcP3-supported cells, but down-regulated in both mOct4- and LcP1-  
1368 supported cell lines were analysed by GO term analysis (Left panel). Heatmaps of genes from  
1369 the ‘biological adhesion’ GO term were enriched in the LcP3-rescued clones (Right panel). The  
1370 set of genes specifically up-regulated in LcP3-supported ESCs (1199 genes) were compared to  
1371 top 100 most significant genes up-regulated in EpiSC when compared to naïve ESCs<sup>47</sup>. List of  
1372 genes shared in both EpiSC and LcPOU5F3-rescued clones were used to construct a heatmap  
1373 to visualise their expression. **c**, Relative gene expression of naïve, rosette and primed  
1374 pluripotency markers and cell adhesion markers of mOct4, LcP1 or LcP3-rescued cells under  
1375 SL/Rosette/EpiLC culture conditions were analysed by qRT-PCR, as shown in Fig. 5e.  
1376 Statistical analyses (Unpaired *t*-Test) were performed on  $n=3$  biological replicates (stable  
1377 clones expanded from the same POU5 rescue experiment).

1378



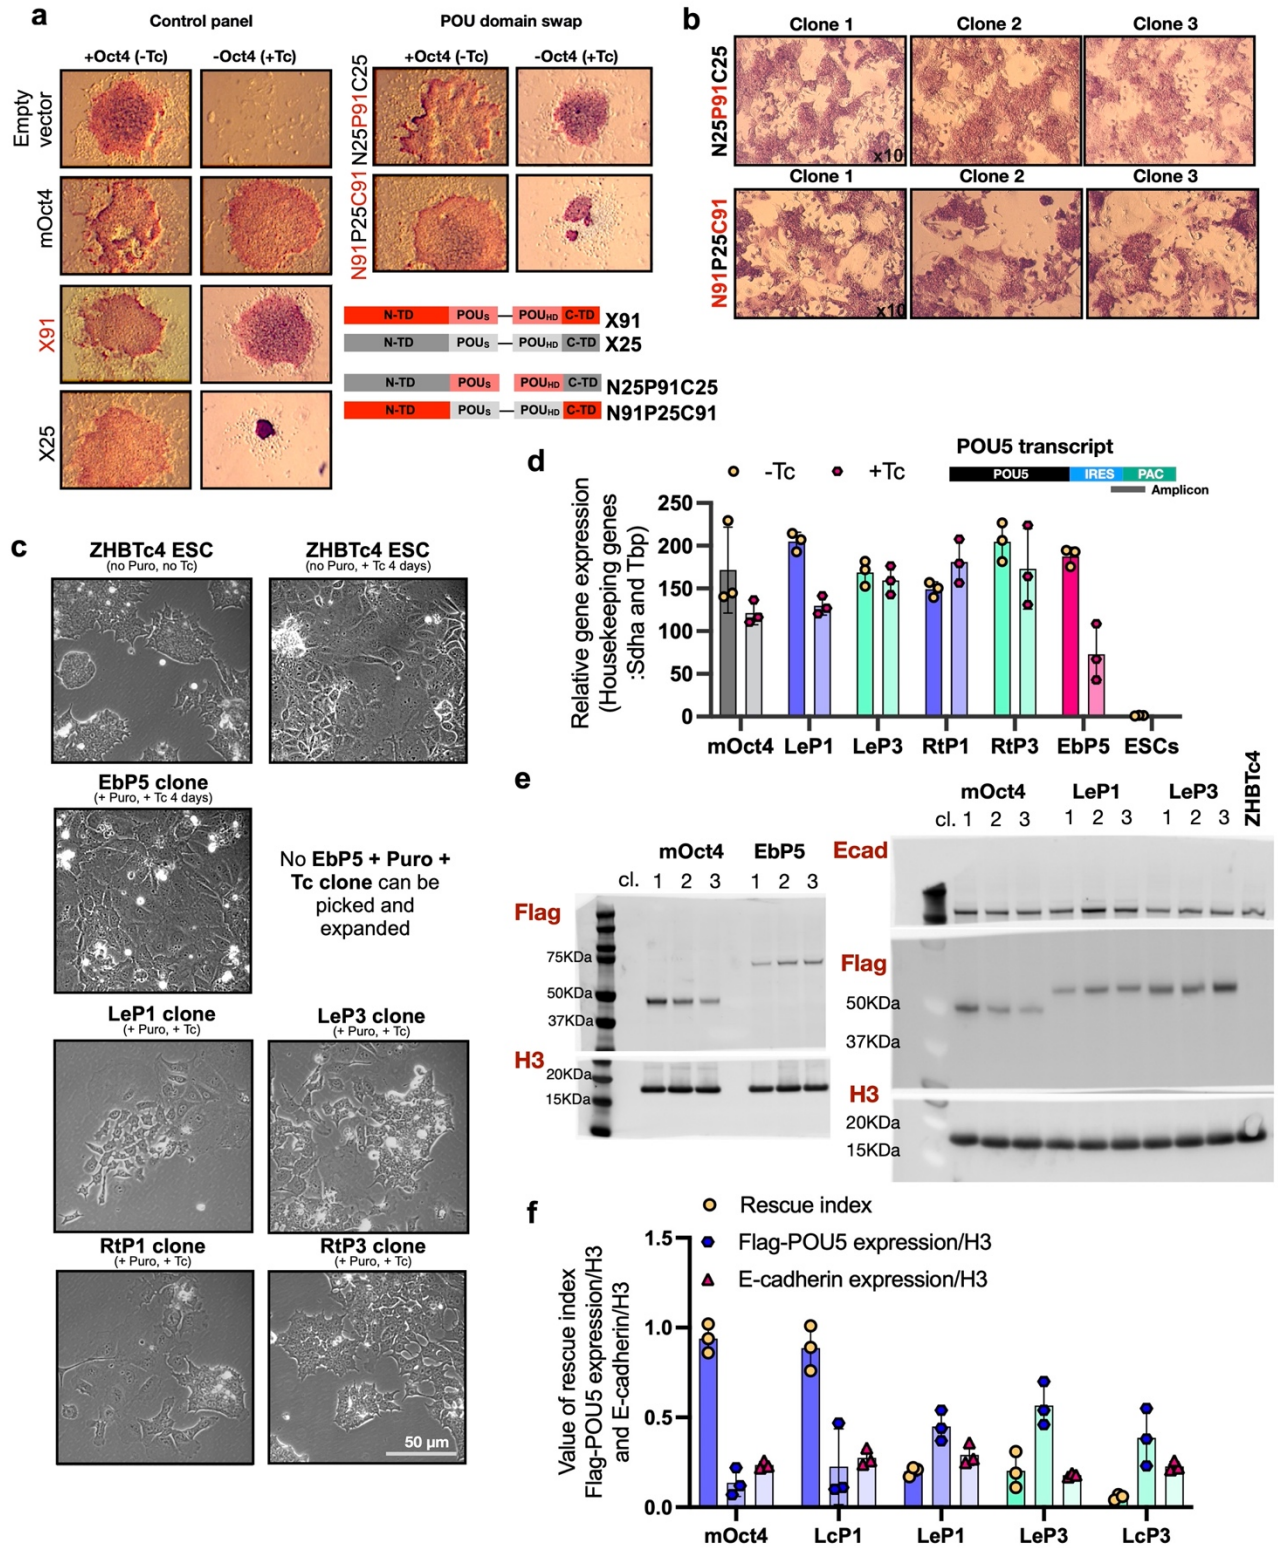

1379

1380

1381 **Supplementary Fig. 5, related to Fig. 6 Chondrichthyans POU5 rescue activity**  
1382 **and functional domains.**

1383 **Mapping the functional domains of POU5 proteins responsible for rescue of**  
1384 **OCT4-null ESCs.**

1385 As *Xenopus* proteins have a similar coding sequence, but differ dramatically in their rescue  
1386 activity, we used these proteins to initially map the functional domains responsible for rescue.  
1387 **a**, Morphology of chimeric POU5-rescued ESC colonies stained for alkaline phosphatase (AP,  
1388 purple) activity. OCT4-null ESCs were rescued by X91-X25 chimeric proteins and data for the  
1389 POU domain swap is shown. X91 is as effective as mOct4 at supporting ESC self-renewal.  
1390 Swapping POU domain of X91 into X25 improved rescue activity of X25 while replacement  
1391 of POU domain in X91 from X25 diminished the capacity of X91 to support ESCs. **b**, Stable  
1392 OCT4-null ESCs cultures rescued with X91-X25 chimeric proteins were also stained for AP  
1393 activity.

1394 **Chondrichthyan, but not cyclostome POU5 proteins rescue Oct4 phenotypes.**

1395 **c-f**, Analysis of expanded, stable OCT4-null ESC clonal lines rescued by Chondrichthyan  
1396 POU5 proteins. As Hagfish POU5 (EbP5) cannot rescue, EbP5 expressing colonies were picked  
1397 and expanded in the absence of Tc, then treated with Tc for four days to remove OCT4 before  
1398 imaging. **c**, Bright-field images of expanded colonies. **d**, Expression of the puromycin-resistant  
1399 gene used to indirectly measure POU5 transcript levels between different POU5-rescued clonal  
1400 lines, measured by qRT-PCR. **e**, Western blots showing levels of FLAG tagged proteins,  
1401 representing levels of POU5 and E-cadherin (Ecad), in three clones per rescued line with H3 as  
1402 a loading control. **f**, Bar chart showing the comparison between the rescue index for each  
1403 species and the relative POU5 and E-cadherin protein levels from stable rescued lines (see  
1404 Supplementary fig. 2). Individual data points in the bar graphs represent values from three  
1405 independent clonal lines.

1406



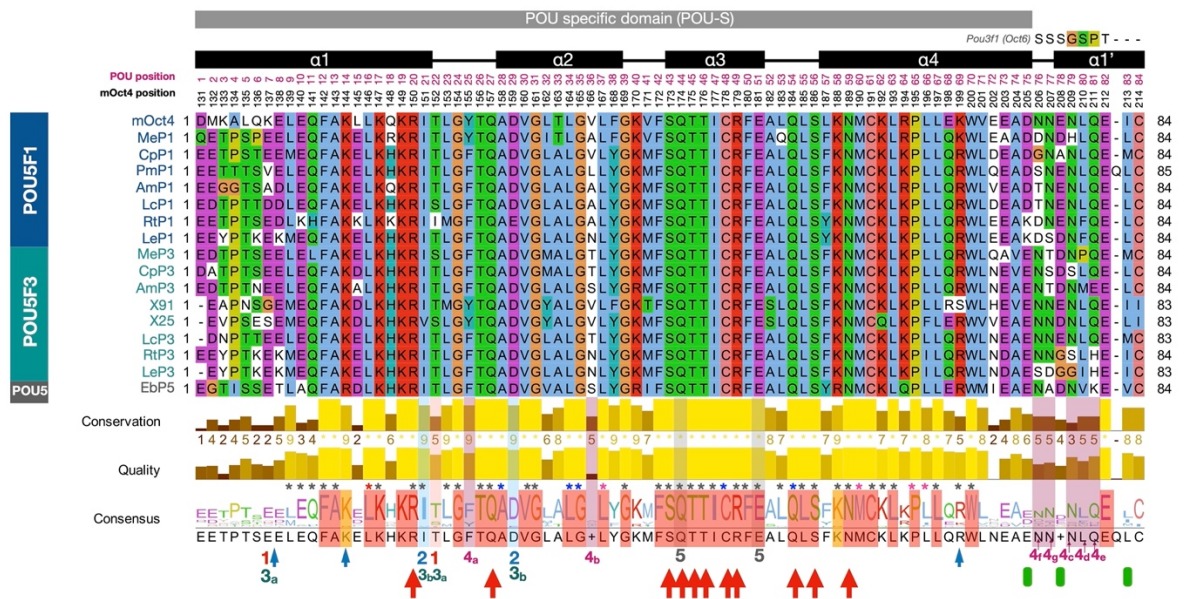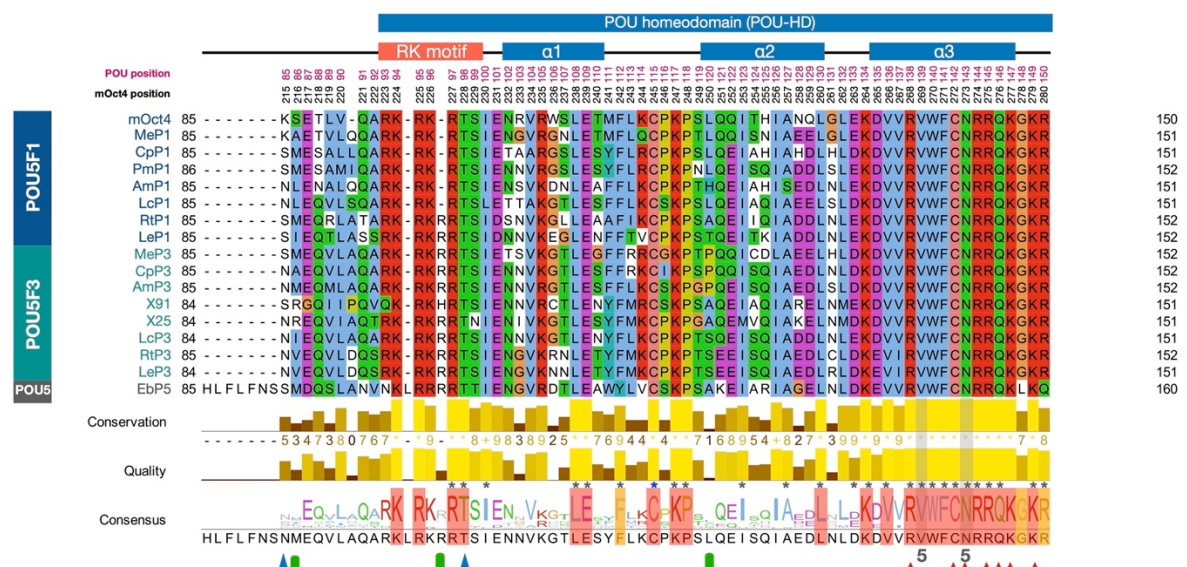

| Abbr.             | Details                                                                                                                                                                                                                                                                                                                                          | Ref.                       | Abbr.    | Details                                                                                                                                                                                                                                                                                                                                                                                                                                                                                                                                                                                                                                                                                                                                                                                                                                                                                                                                                                                                                                                                                                                                                                            | Ref.                                                                                  |
|-------------------|--------------------------------------------------------------------------------------------------------------------------------------------------------------------------------------------------------------------------------------------------------------------------------------------------------------------------------------------------|----------------------------|----------|------------------------------------------------------------------------------------------------------------------------------------------------------------------------------------------------------------------------------------------------------------------------------------------------------------------------------------------------------------------------------------------------------------------------------------------------------------------------------------------------------------------------------------------------------------------------------------------------------------------------------------------------------------------------------------------------------------------------------------------------------------------------------------------------------------------------------------------------------------------------------------------------------------------------------------------------------------------------------------------------------------------------------------------------------------------------------------------------------------------------------------------------------------------------------------|---------------------------------------------------------------------------------------|
| <b>Red box</b>    | Conserved residues in all POU5s from both cyclotome and gnathostomes                                                                                                                                                                                                                                                                             | In this study              | <b>1</b> | Residues required for maintenance of pluripotency                                                                                                                                                                                                                                                                                                                                                                                                                                                                                                                                                                                                                                                                                                                                                                                                                                                                                                                                                                                                                                                                                                                                  | Nishimoto et al., 2005                                                                |
| <b>Orange box</b> | Conserved residues in all POU5s from gnathostomes but not in cyclotomes                                                                                                                                                                                                                                                                          | In this study              | <b>2</b> | Residues required for Oct4-Sox2 interaction on canonical SoxOct elements                                                                                                                                                                                                                                                                                                                                                                                                                                                                                                                                                                                                                                                                                                                                                                                                                                                                                                                                                                                                                                                                                                           | Remenyi et al., 2003                                                                  |
| <b>*</b>          | (Grey) Conserved residues found in Pit1, Oct1, Oct2, Oct6 and Oct4<br>(Red) Conserved residues found only in all Oct4 homologues, not in Pit1, Oct1, Oct2, Oct6<br>(Blue) Conserved residues found only in all Oct4 homologues and Oct6, not in Pit1, Oct1, Oct2<br>(Pink) Conserved residues found in Oct1, Oct2, Oct6 and Oct4 but not in Pit1 | Jin et al., 2016           | <b>3</b> | -3a - Mutation at these residues in mOct4 can still generate iPSCs (60% to WT)<br>-3b - Mutation at these residues in mOct4 can no longer generate iPSCs & Importance for Sox2-Oct4 heterodimerization.                                                                                                                                                                                                                                                                                                                                                                                                                                                                                                                                                                                                                                                                                                                                                                                                                                                                                                                                                                            | Jerabek et al., 2017                                                                  |
| <b>Red arrow</b>  | Residues interacting with DNA based on AlphaFold2-structural models in this study                                                                                                                                                                                                                                                                | In this study              | <b>4</b> | <b>Oct4 structure</b><br>-4a (Y155 <sup>POU29</sup> ) in mOct4 interacting with 4e (Q211 <sup>POU81</sup> ) in linker region of mOct4<br>-4b (V166 <sup>POU39</sup> ) in mOct4 interface with C-terminal part of the linker α1.<br>-4c and 4d (N209 <sup>POU79</sup> and L210 <sup>POU80</sup> ) in linker) exposed to surface of linker.<br><b>Oct4 in iPSC generation and ESCs</b><br>-Mutation in 4b, 4f, 4g, 4c (V166K <sup>POU39</sup> , N206A <sup>POU78</sup> , N207A <sup>POU77</sup> , N209A <sup>POU79</sup> ) in linker) - reduce iPSC Colonies<br>-Mutation in 4d, 4e (L210A <sup>POU80</sup> , Q211R <sup>POU81</sup> ) in linker) - no iPSCs<br>-Xenopus Xipou91 with residue "NLQ" in linker (4c,4d,4e) - produce iPSC colonies similar to mOct4.<br>-Zebrafish POU5F3 with residue "P" in linker (4d) - no iPSCs<br>-Replacing Oct4 linker with Oct6 linker - no iPSCs<br><b>In ZHBTc4 model</b><br>-Quadruple mutant (N206A <sup>POU78</sup> , N207A <sup>POU77</sup> , N209A <sup>POU79</sup> , L210A <sup>POU80</sup> ) - 4f, 4g, 4c, 4d) - no ESC rescue<br>-Mutation in 4d (L210A <sup>POU80</sup> ) - partial ESC rescue* ; impaired embryonic development** | Esch et al., 2013<br>*also in Dong et al., 2022<br>**New finding in Dong et al., 2022 |
| <b>Blue arrow</b> | <b>Protein modifications (based on mouse Oct4)</b><br>Abbr. Ub, Ubiquitylation; P, Phosphorylation<br>K137 <sup>POU7</sup> ; Ub; K144 <sup>POU14</sup> ; Ub; K199 <sup>POU88</sup> ; Ub; K215 <sup>POU88</sup> ; Ub; T229 <sup>POU88</sup> ; P                                                                                                   | PhosphoSitePlus (v6.6.0.2) | <b>5</b> | Mutation in these residue - no iPSCs                                                                                                                                                                                                                                                                                                                                                                                                                                                                                                                                                                                                                                                                                                                                                                                                                                                                                                                                                                                                                                                                                                                                               | Jin et al., 2016                                                                      |
| <b>Green box</b>  | Potential POU5F1 specific residues                                                                                                                                                                                                                                                                                                               | In this study              |          |                                                                                                                                                                                                                                                                                                                                                                                                                                                                                                                                                                                                                                                                                                                                                                                                                                                                                                                                                                                                                                                                                                                                                                                    |                                                                                       |

1407

1408

1409 **Supplementary Fig. 6, related to Fig. 7 Multiple sequence alignment of POU5**  
1410 **proteins used in Oct4 rescue assays.**

1411 Protein sequences from POU5s were aligned using MUSCLE and visualized in Jalview<sup>77</sup>.  
1412 Consensus logo indicating conservation level is shown below the alignment. The uniqueness of  
1413 each residue among POU5 proteins was identified based on literature review and AlphaFold2-  
1414 based protein-DNA interaction in this study. Residue conservation among POU proteins (PIT1,  
1415 OCT1, OCT2, OCT4 and OCT6) is marked with coloured asterisks on the top of consensus  
1416 logo and level of conservation is shown with coloured boxes over the consensus sequence,  
1417 explanation below the alignment (lower left). POU domain-DNA interactions from  
1418 AlphaFold2-based mOct4 structural models using ChimeraX are noted with red arrows and  
1419 residues with reported post-translational modifications are noted with blue arrows. Literature  
1420 references for functional analysis of residues are noted under the consensus logo as a table (1-  
1421 5<sup>49-54,78,79</sup>), with the role of the residue detailed below the alignment (lower right).

1422



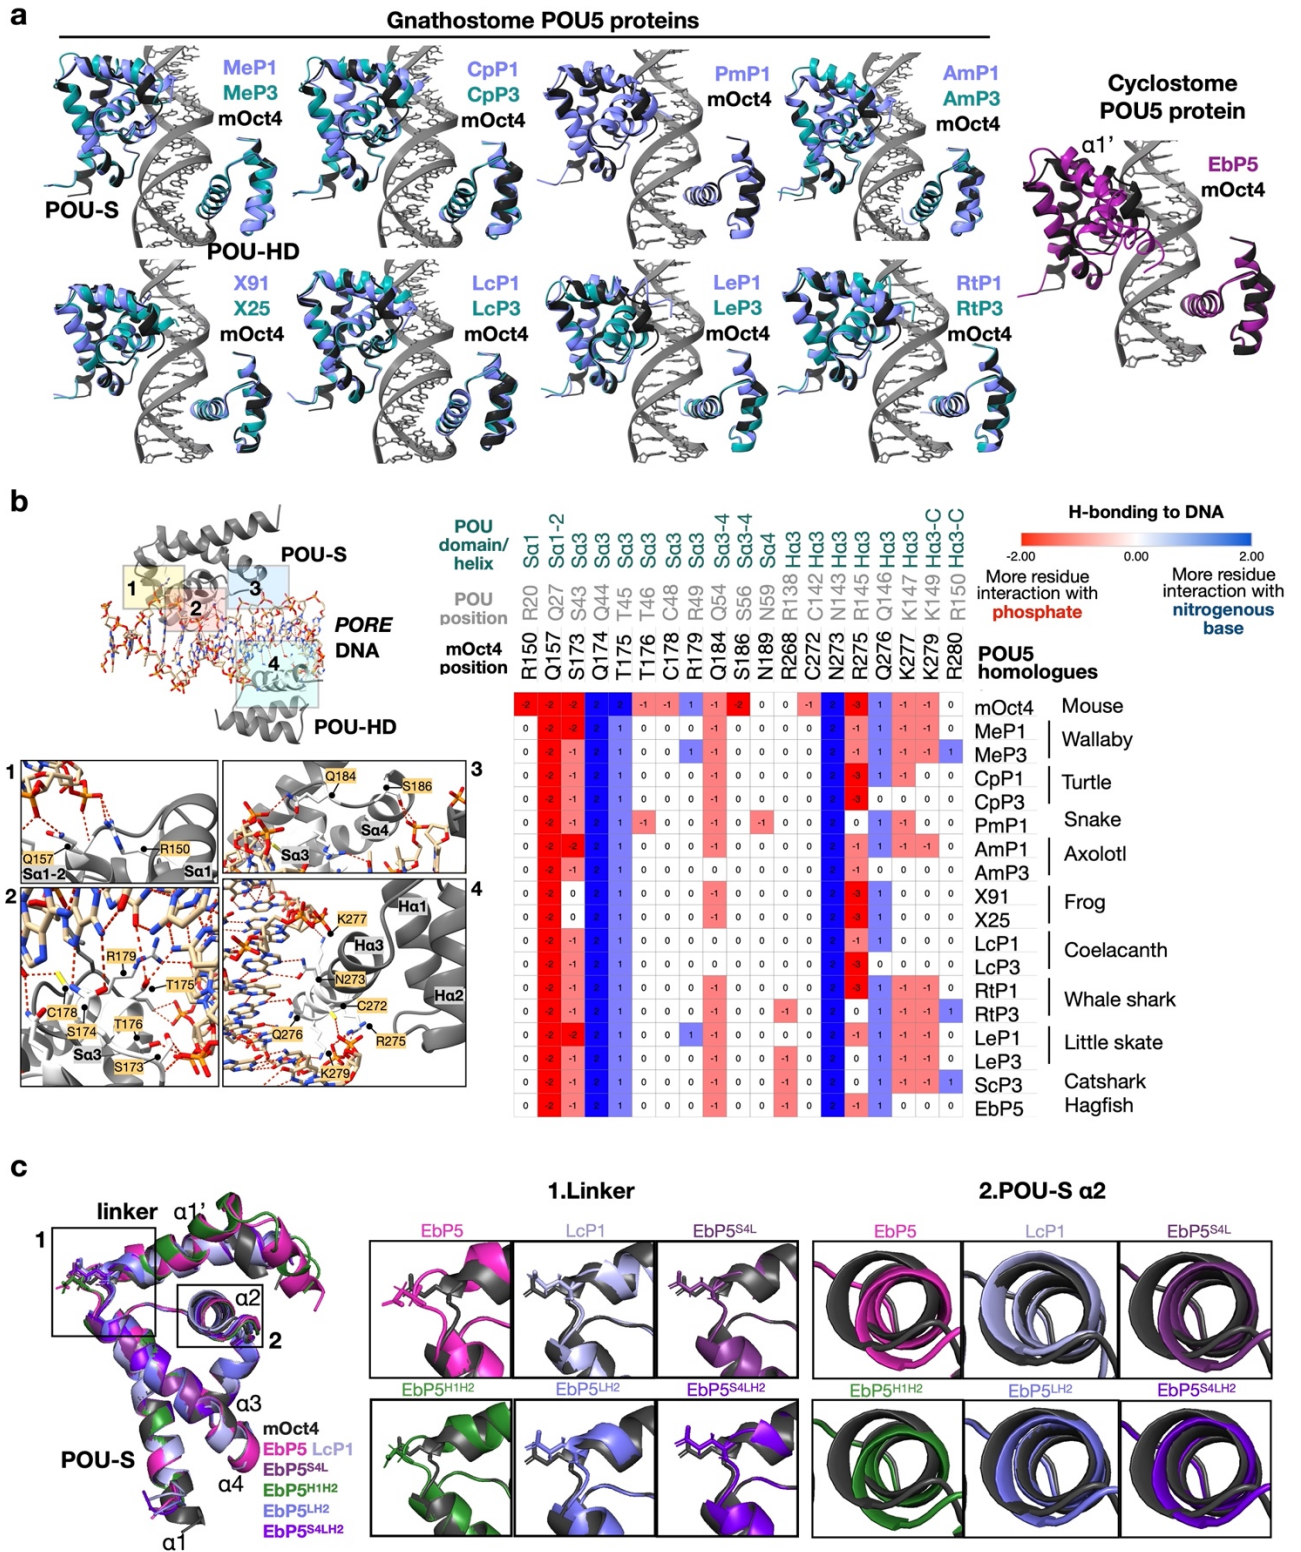

1423

1424

1425 **Supplementary Fig. 7, related to Fig. 7 AlphaFold2-based structural models for**  
1426 **POU5 proteins used in Oct4 rescue assays.**

1427 **a**, Predicted structures for all gnathostome and cyclostome POU5 homologues analysed for  
1428 rescue potential in OCT4-null ESCs (Figures 2 and 6) using AlphaFold2. The POU-S domain  
1429 together with the linker helix (POU-S-L) and the POU-HD of each pair of POU5 homologues  
1430 are shown in superimposition to mOct4 (black) on the *PORE* DNA element (PDB ID: 3L1P)  
1431 and visualized by ChimeraX. **b**, POU-DNA H-bond interactions were predicted by ChimeraX.  
1432 The number of H-bonds from each residue interacting with nitrogenous base (blue, positive  
1433 value) and/or phosphate (red, negative value) of the DNA are shown as a heatmap, produced  
1434 by Morpheus<sup>80</sup>. Zoom-ins on the mOct4-*PORE* interaction regions to visualize specific residues  
1435 (boxes 1-4). **c**, AlphaFold2 predicted structures for chimeric proteins. Superimposition of POU-  
1436 S domains from mOct4, LcP1, EbP5 and the four chimeras (left side), with zoom-in 1 focusing  
1437 on the E208<sup>(POU78)</sup> residue found altered in the bend between the POU-S  $\alpha$ 4 and the Linker  $\alpha$ 1'  
1438 and the zoom-in 2 focusing on the positioning of POU-S  $\alpha$ 2, each structure is compared to  
1439 mOct4 (dark grey).

1440

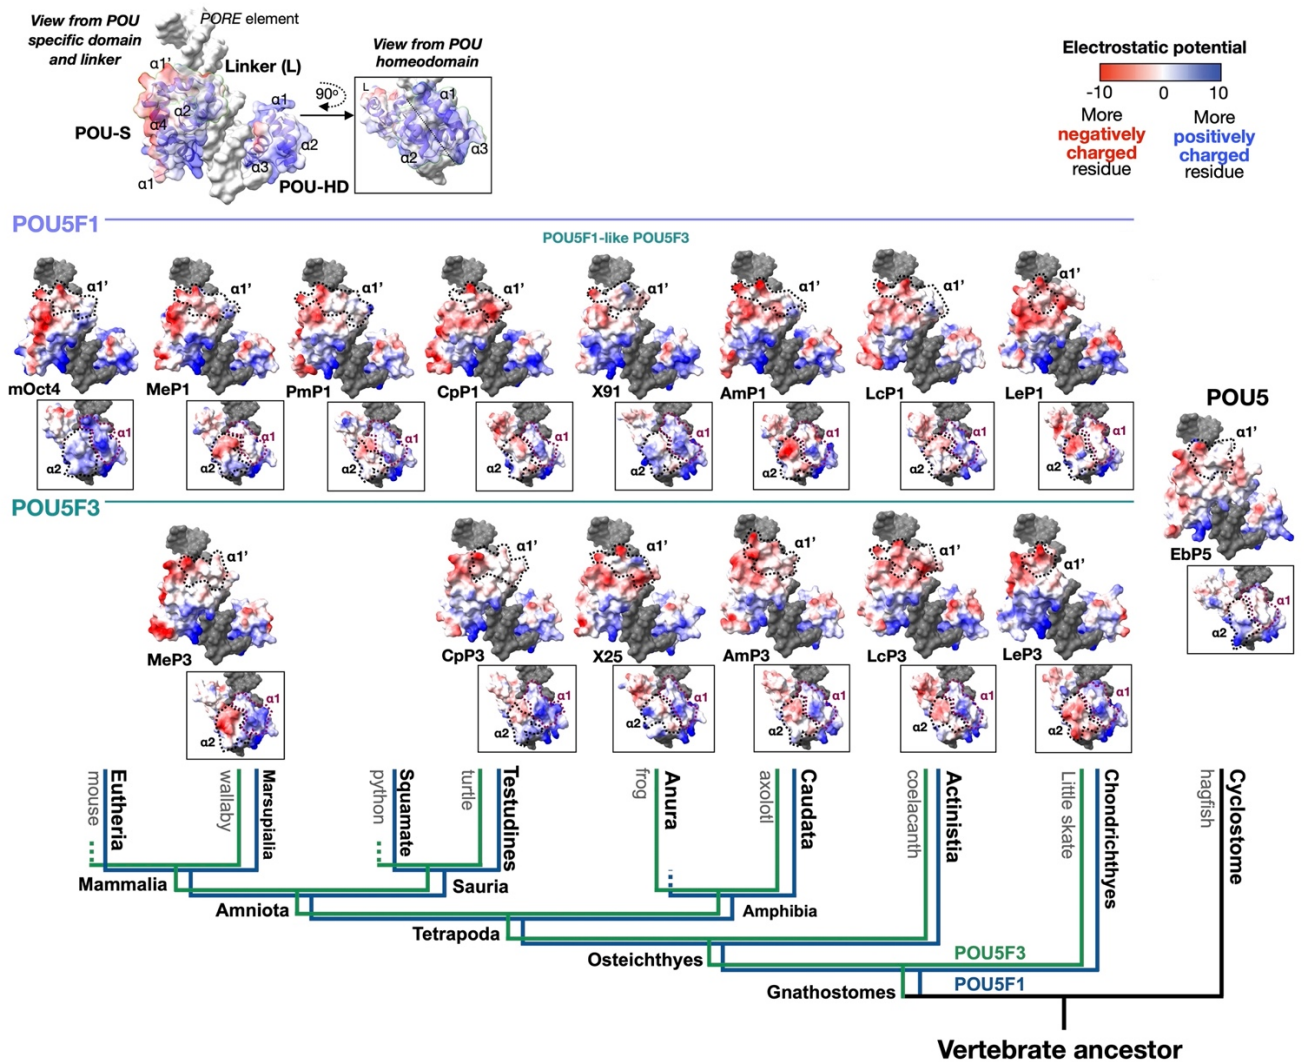

1441

1442 **Supplementary Fig. 8, related to Fig. 7 Electrostatic potential of all AlphaFold2-**  
 1443 **based POU5 structural models.**

1444 Predicted electrostatic surface potentials of POU5 domains on the *PORE* DNA element for all  
 1445 gnathostome and cyclostome POU5 homologues analysed. Surface charges, determined by  
 1446 ChimeraX, with negatively charged areas shown in red and positively charged in blue. Each  
 1447 POU5 protein has an orientation focusing on the POU-S-L (top) and the POU-HD (boxed  
 1448 below) with a description of the views above. The structures are organized based on the  
 1449 phylogeny tree shown at the bottom.

1450



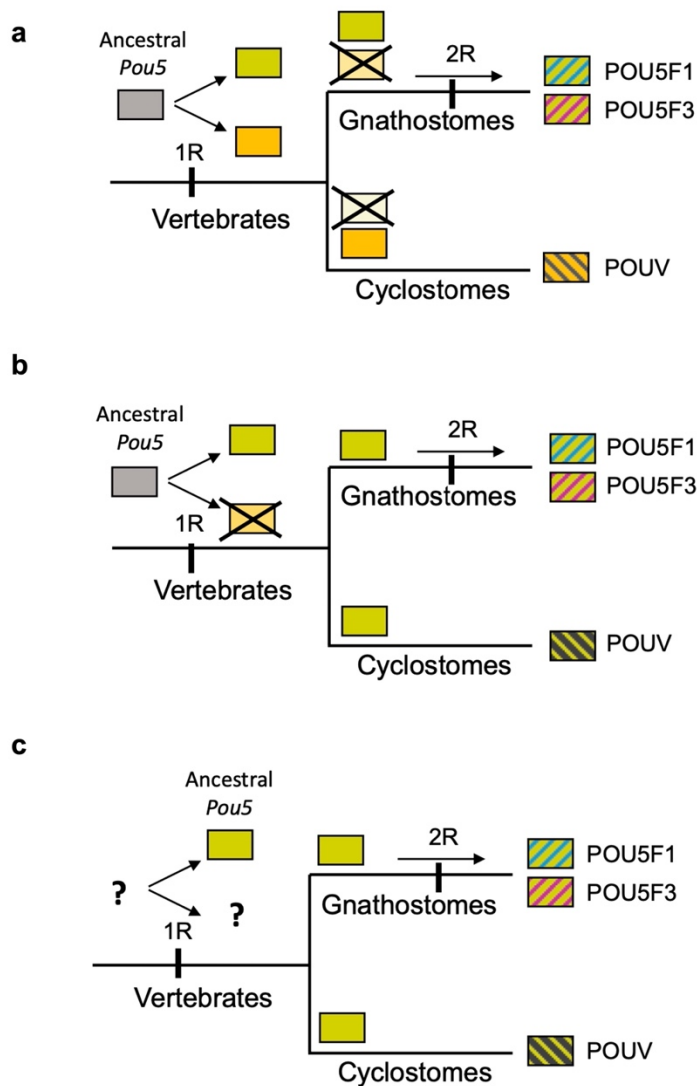

1451

1452 **Supplementary Fig. 9, related to Fig. 9 Evolution of the POU5 family prior to the**  
 1453 **gnathostome radiation.**

1454 Our data suggest that the *Pou5f1/Pou5f3* duplication was part of the second round of vertebrate  
 1455 WGD (whole genome duplications), recently proposed to have followed the split between  
 1456 gnathostomes and cyclostomes<sup>58</sup>. This hypothesis is consistent with both the detection of  
 1457 extensive syntenies found between the paralogous loci and the monophyly of gnathostome  
 1458 *Pou5* genes, POU5F1 and F3 proteins appearing more similar to each other than to their  
 1459 cyclostome counterparts. Different possibilities consistent with these observations are shown.

1460 **a-b**, Early rise of *Pou5* genes in the vertebrate lineage, prior to the first round of WGD (1R)  
 1461 with **(a)** differential losses of either one of 1R duplicates between gnathostomes and  
 1462 cyclostomes or **(b)** loss of one 1R duplicate prior to the gnathostome-cyclostome split. **c**,  
 1463 variation of **b**, with the rise of *Pou5* genes following the 1R WGD.

1464

1465 **Supplementary Table 1, related to Fig. 1 Accession numbers of the sequences**  
1466 **used in synteny and phylogenetic analyses and predictions of *POU5* coding**  
1467 **sequences from genomic databases.**

1468

1469 **Supplementary Table 2, related to Fig. 5 Gene Expression Data and Gene**  
1470 **Ontology Analysis based on the transcriptomic comparisons of coelacanth (Lc)**  
1471 ***POU5*-rescued and mOct4-rescued ESC lines.**

1472

1473 **Supplementary Table 3. Resources used in and generated by this study.**

1474 Reagents, plasmids, cell lines, antibodies, software and deposited data are listed, together with  
1475 the places they can be obtained from. For all antibodies, the dilution used is indicated.  
1476 Catalogue numbers are listed where relevant.

1477

1478 **Supplementary Dataset 1, related to Fig. 1 Alignment *POU5\_Ali.fst*.**

1479 Alignment of the POU specific domain ( $POU_S$ ), Linker domain and POU homeodomain  
1480 ( $POU_{HD}$ ) of *POU5* proteins used to generate the consensus sequence of *POU5* protein (Fig. 1a)  
1481 and the phylogenetic tree showing the evolutionary rates of vertebrate *POU5* proteins (Fig. 1c).

1482

1483 **Supplementary Information 1 Syntenic analysis, phylogenetic analysis and the**  
1484 **estimation of rate of *POU5* protein evolution.**

1485

1486 **Supplementary Information 2 Additional information for figures.**

1487

1488 **Supplementary Information 3 Structural models of *POU5* homologues from**  
1489 **AlphaFold2.**
